# Supplementary material for: RNA-sequencing Oryza sativa transcriptome in response to herbicide isoprotruon and characterization of genes involved in IPU detoxification
Source: Royal Society of Chemistry journal article supplement (doi:10.1039/c5ra25986j), 2016-01-01
Supplement: c5ra25986j1.pdf [file c5ra25986j1.pdf]

### Electronic Supplementary Information†

**Title:** RNA-sequencing *Oryza sativa* transcriptome in response to herbicide isoproturon and characterization of genes involved in IPU detoxification

**Name of authors:** Yi Chen Lu<sup>a,b</sup>, Jing Jing Zhang<sup>a,b</sup>, Fang Luo<sup>a</sup>, Meng Tian Huang<sup>a</sup>, Hong Yang<sup>a\*</sup>

**Institute:** <sup>a</sup>Jiangsu Key Laboratory of Pesticide Science, College of Sciences, Nanjing Agricultural University, Nanjing 210095, China; <sup>b</sup>State & Local Joint Engineering Research Center of Green Pesticide Invention and Application, Nanjing Agricultural University, Nanjing 210095, China

\***Corresponding author E-mail:** hongyang@njau.edu.cn

#### Table of content:

EIC Figs. S1–7 (Pages 2–11);

EIC Tables S1–11 (Pages 12–92);

EIC Data S1—Materials and methods (Pages 93–97);

EIC Data S2—Results and discussion (Pages 97–102).

† Electronic supplementary information (ESI) available. See online.

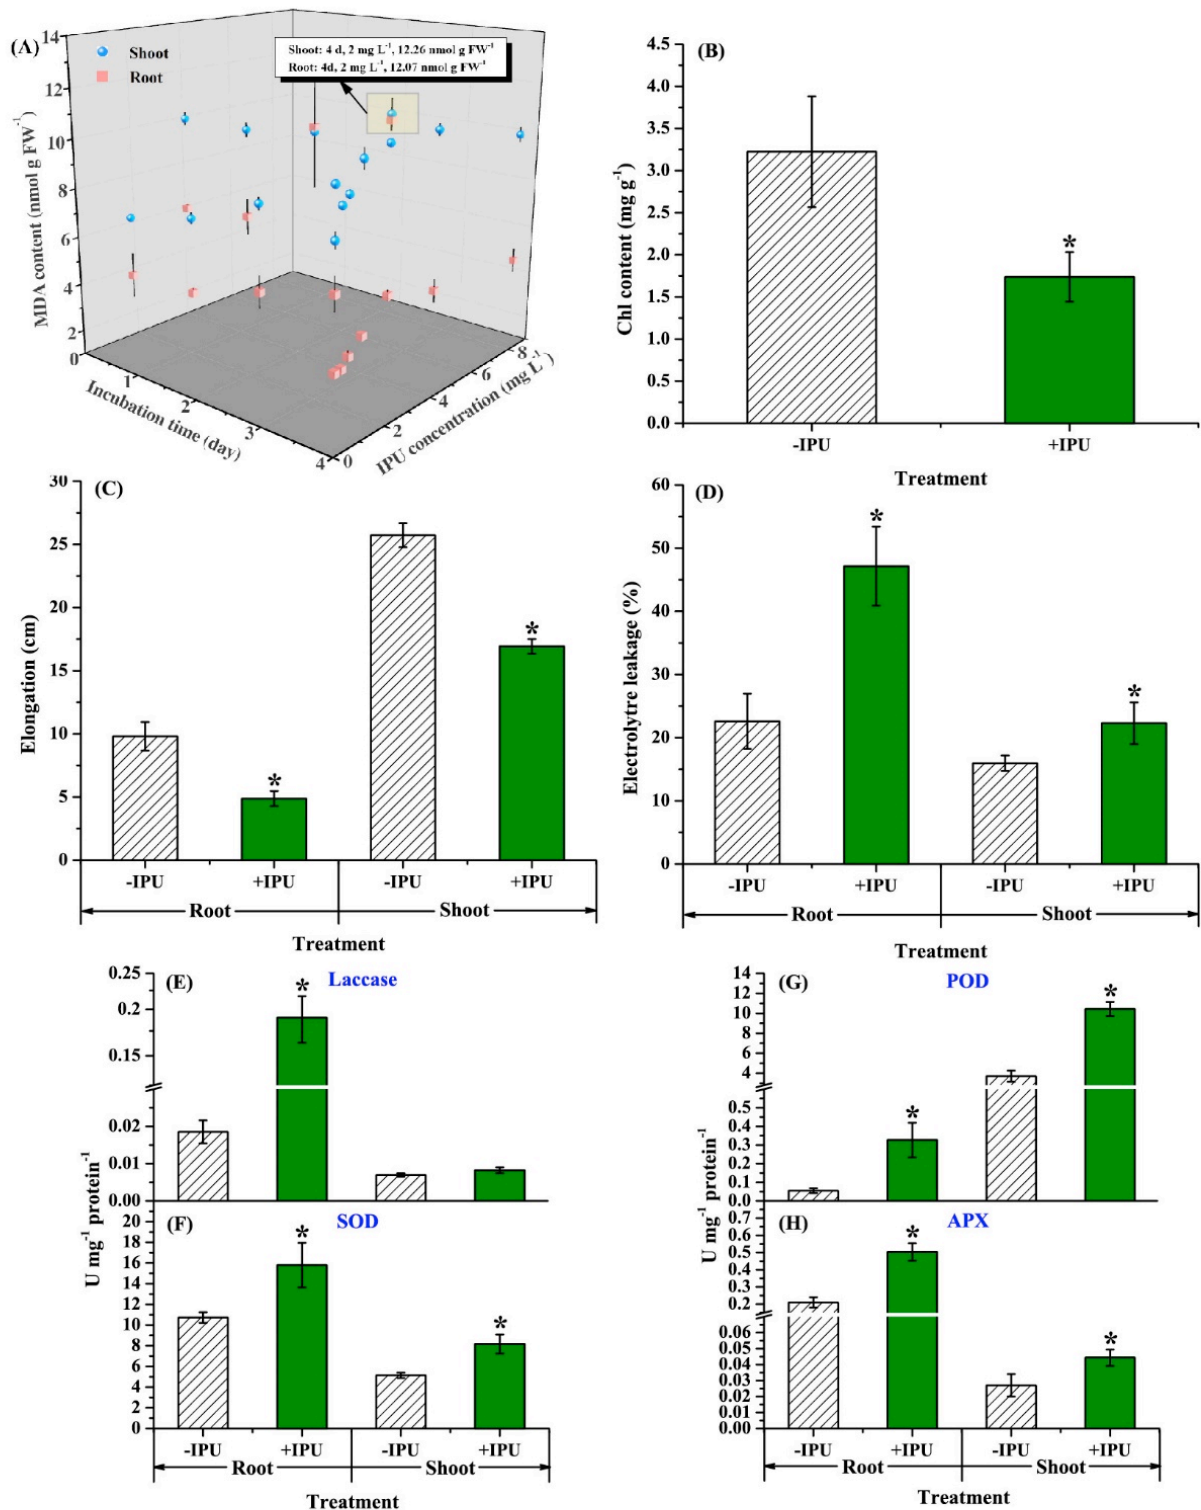

**ESI Fig. S1** Effect of isoproturon on the content of MDA (A) and chlorophyll (B), elongation (C), electrolyte leakage (D), and laccase (E), SOD (F), POD (G) and APX (H) activities of rice. Rice seedlings for MDA test were exposed to 0, 2, 4, 6, 8 mg L<sup>-1</sup> IPU for 1, 2, 3, 4 d. For

the rest experiments, rice seedlings were exposed to 0 and 2 mg L<sup>-1</sup> IPU for 4 d. Values are the means  $\pm$  SD ( $n=3$ ). Asterisks indicate significant differences between the treatments and the control ( $p < 0.05$ ).

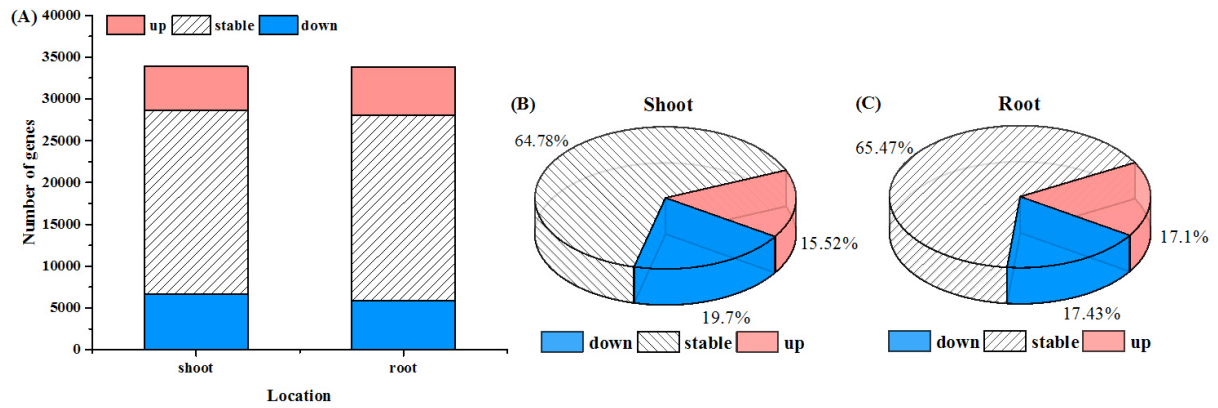

**ESI Fig. S2** Number and percentage of genes regulated or with a stable expression after IPU application compared to control. (A) Number of genes up-regulated, down-regulated or with a stable expression in shoot and root of IPU-treated rice seedlings compared to the control. (B, C) The percentage of genes up-regulated, down-regulated or with a stable expression in shoot and root of IPU-treated rice seedlings compared to the control.

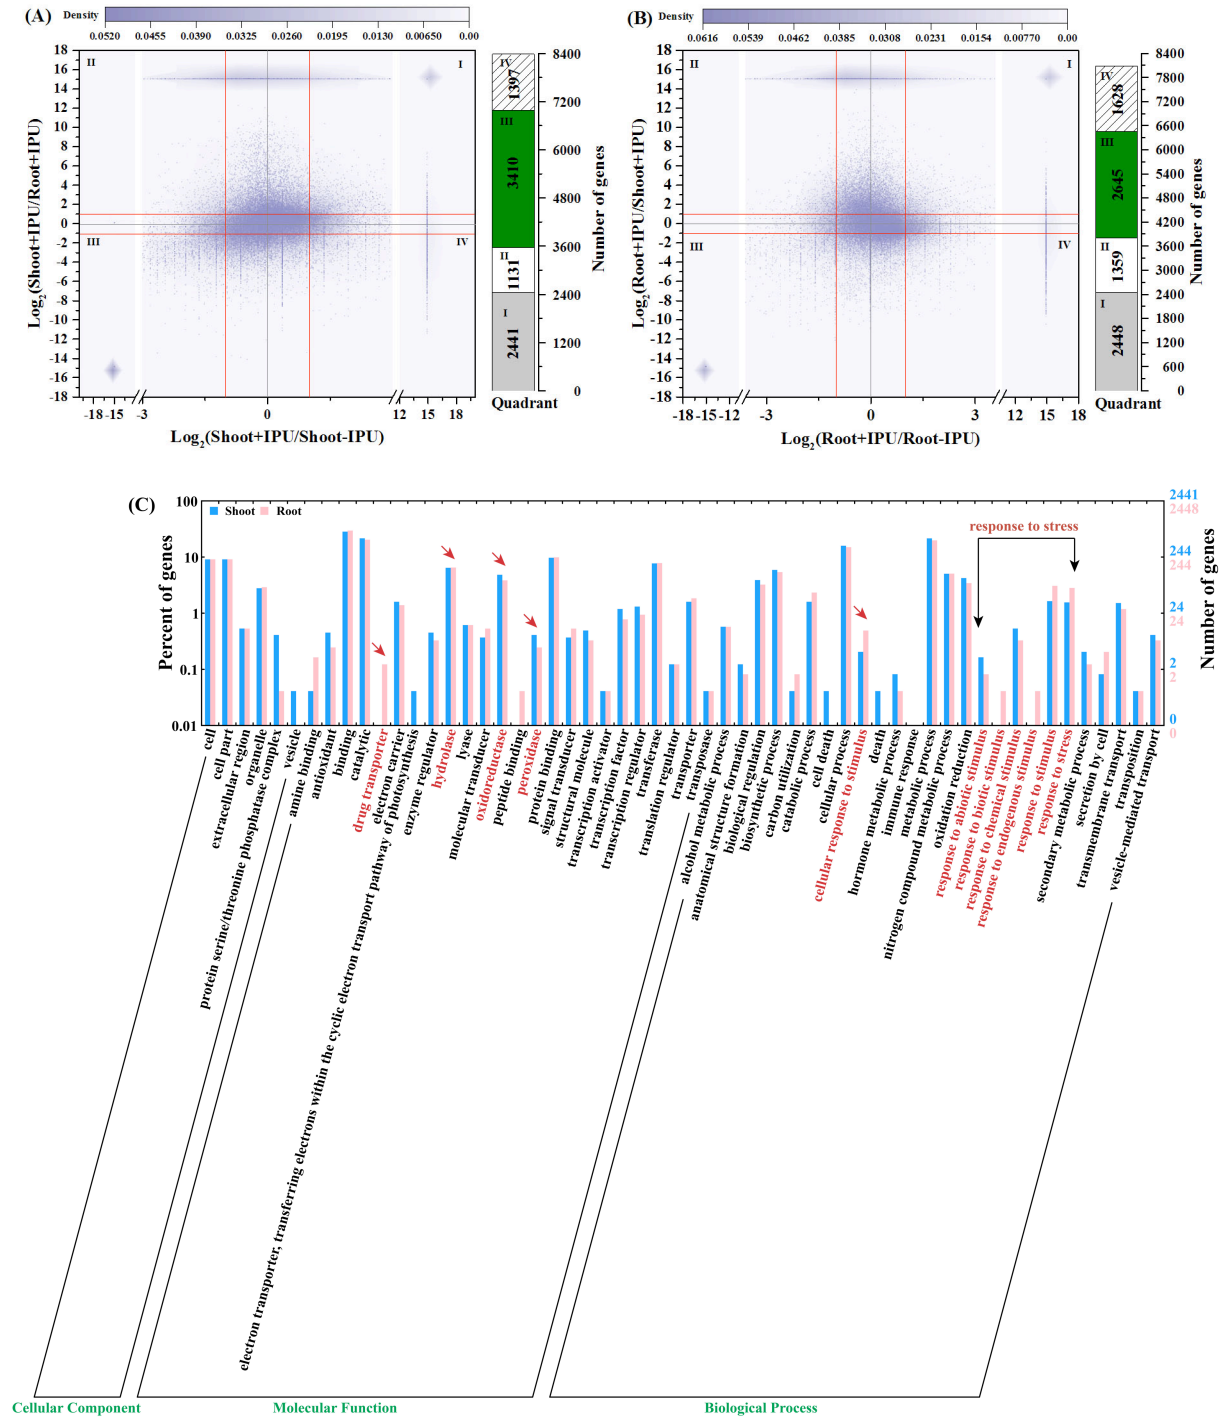

**ESI Fig. S3** 2D density plot of gene expression analysis and Gene Ontology (GO) term enrichment analyses of DEGs which are both induced by IPU and up-regulation in s in shoot and root of *Oryza sativa*. The gene-normalized signal intensities are shown in the density plot using a  $\text{Log}_2\text{Ratio}$ .

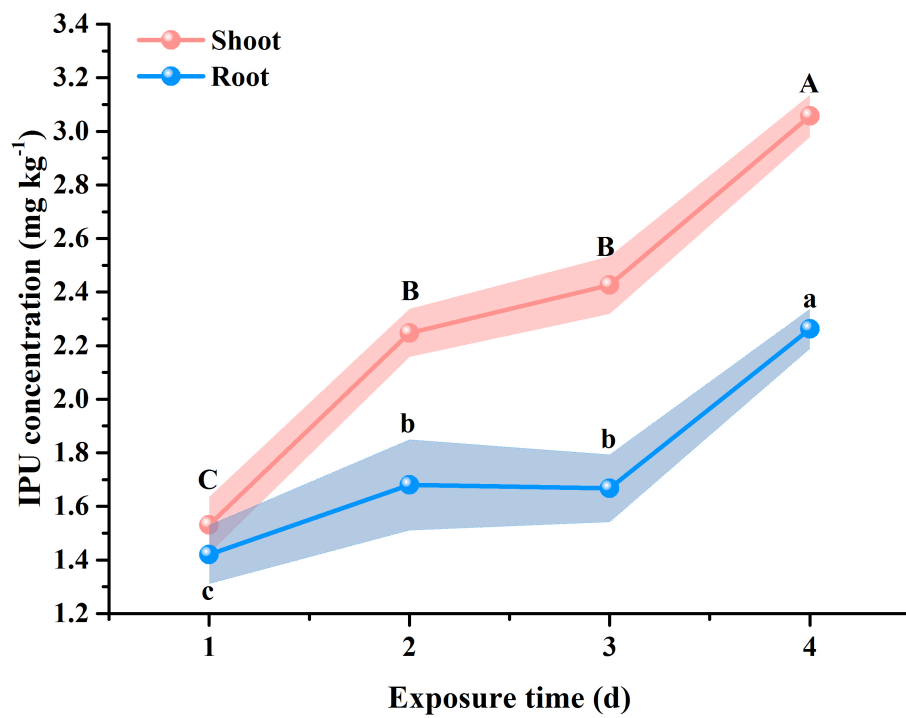

ESI Fig. S4 IPU content in shoot and root of rice exposed to 2 mg L<sup>-1</sup> for 1, 2, 3 and 4 d.

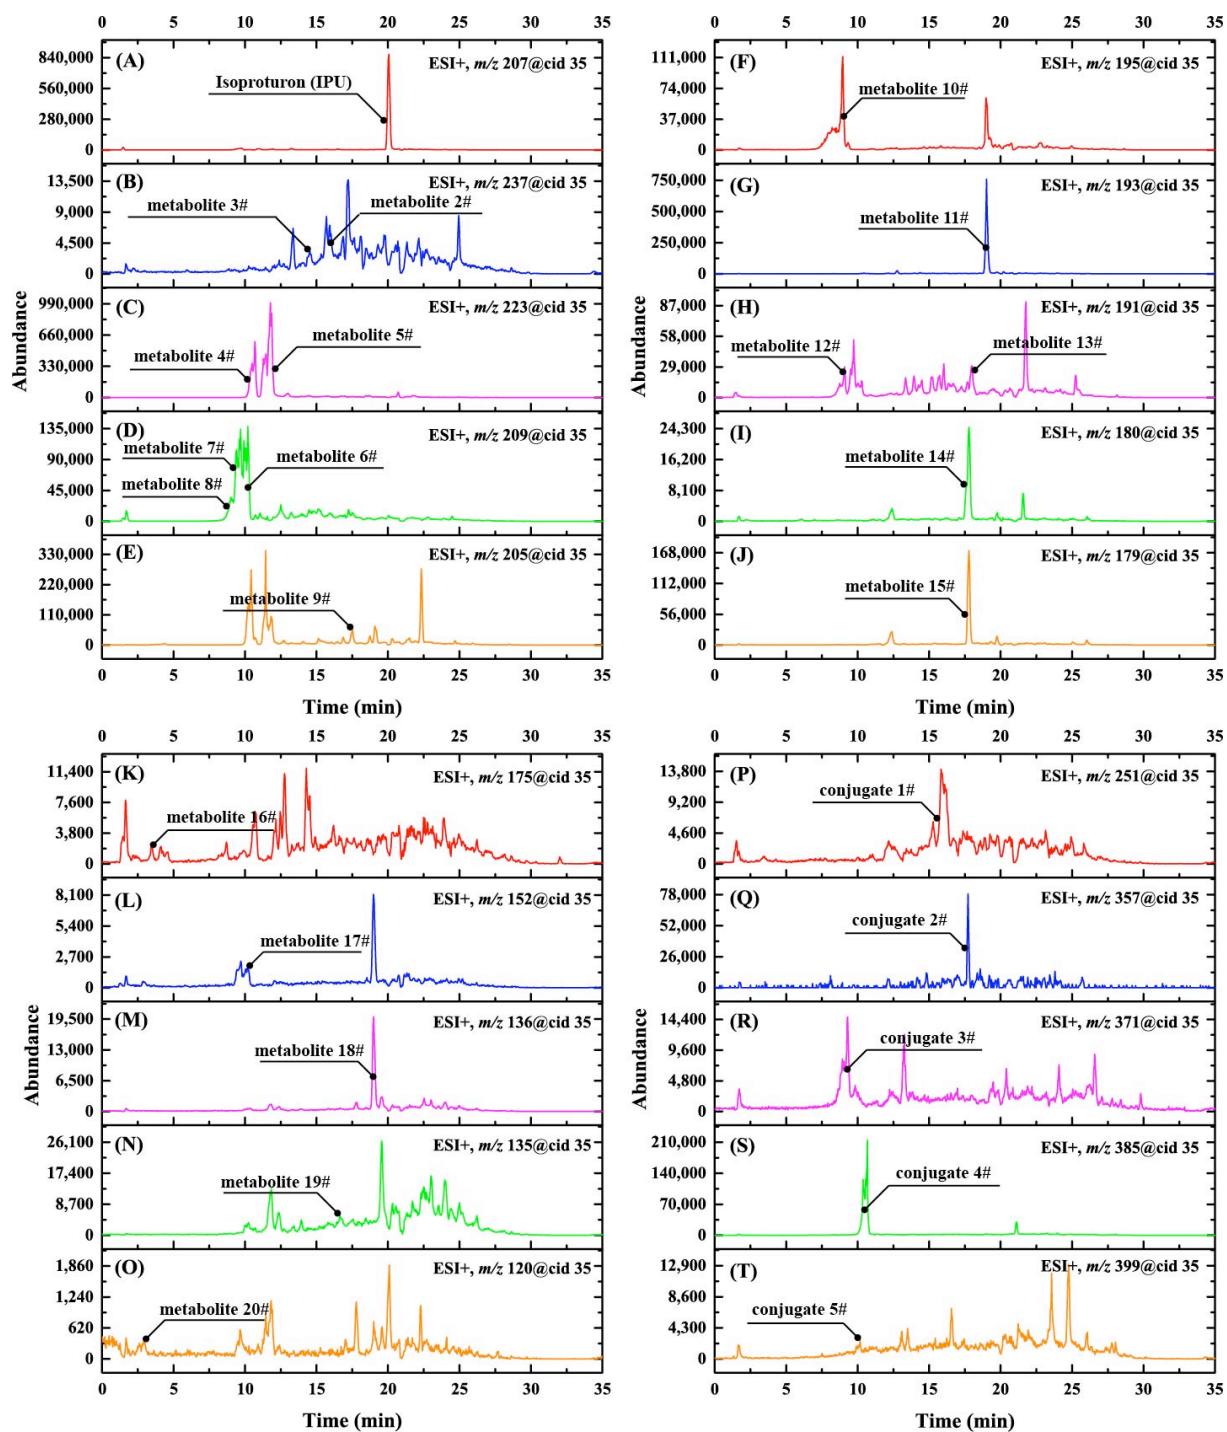

**ESI Fig. S5** Extracted ion chromatograms of isotreturon (IPU) and its metabolites and conjugates in rice from UHPLC LTQ Orbitrap XL analysis. (A) Extracted ion chromatogram of  $m/z$  207.1479 (IPU). The metabolites as follow: (B) the peak of metabolite 2# ( $m/z$  237.1575) at 15.71 min and metabolite 3# ( $m/z$  237.1212) at 14.49 min; (C) the peak of

metabolite 4# ( $m/z$  223.1423) at 10.66 min and metabolite 5# ( $m/z$  223.1423) at 11.69 min; (D) the peak of metabolite 6# ( $m/z$  209.1276) at 10.18 min, metabolite 7# ( $m/z$  209.1276) at 9.65 min and metabolite 8# ( $m/z$  209.1276) at 9.40 min; (E) the peak of metabolite 9# ( $m/z$  205.1323) at 17.35 min; (F) the peak of metabolite 10# ( $m/z$  195.1140) at 7.94 min; (G) the peak of metabolite 11# ( $m/z$  193.1335) at 18.96 min; (H) the peak of metabolite 12# ( $m/z$  191.1172) at 8.63 min and metabolite 13# ( $m/z$  191.1172) at 17.88 min; (I) the peak of metabolite 14# ( $m/z$  180.1371) at 17.59 min; (J) the peak of metabolite 15# ( $m/z$  179.1167) at 17.78 min; (K) the peak of metabolite 16# ( $m/z$  175.0856) at 3.15 min; (L) the peak of metabolite 17# ( $m/z$  152.1061) at 10.23 min; (M) the peak of metabolite 18# ( $m/z$  136.1111) at 18.84 min; (N) the peak of metabolite 19# ( $m/z$  135.0794) at 16.66 min; (O) the peak of metabolite 20# ( $m/z$  120.0802) at 2.74 min. The conjugates as follow: (P) the peak of conjugate 1# ( $m/z$  251.1369) at 15.97 min; (Q) the peak of conjugate 2# ( $m/z$  357.1643) at 15.97 min; (R) the peak of conjugate 3# ( $m/z$  371.1792) at 9.35 min; (S) the peak of conjugate 4# ( $m/z$  385.1943) at 10.69 min; (T) the peak of conjugate 5# ( $m/z$  399.1730) at 10.46 min.





**Supplementary Figure S6.** MS<sup>2</sup> spectra of IPU and its metabolites in rice from UHPLC LTQ Orbitrap XL analysis. The ion data were obtained from (A) IPU with precursor ion *m/z* 207.1479, (B) metabolite 2# with precursor ion *m/z* 237.1575, (C) metabolite 3# with precursor ion *m/z* 237.1212, (D) metabolite 4# with precursor ion *m/z* 223.1423, (E) metabolite 5# with precursor ion *m/z* 223.1423, (F) metabolite 6# with precursor ion *m/z* 209.1276, (G) metabolite 7# with precursor ion *m/z* 209.1276, (H) metabolite 8# with precursor ion *m/z* 209.1276, (I) metabolite 9# with precursor ion *m/z* 205.1323, (J) metabolite 10# with precursor ion *m/z* 195.1140, (K) metabolite 11# with precursor ion *m/z* 193.1326, (L) metabolite 12# with precursor ion *m/z* 191.1172, (M) metabolite 13# with precursor ion *m/z* 191.1172, (N) metabolite 14# with precursor ion *m/z* 180.1371, (O) metabolite 15# with precursor ion *m/z* 179.1167, (P) metabolite 11# with precursor ion *m/z* 175.0856, (Q) metabolite 17# with precursor ion *m/z* 152.1061, (R) metabolite 18# with precursor ion *m/z* 136.1111, (S) metabolite 19# with precursor ion *m/z* 135.0794, and (T) metabolite 20# with precursor ion *m/z* 120.0802 of degradation products.

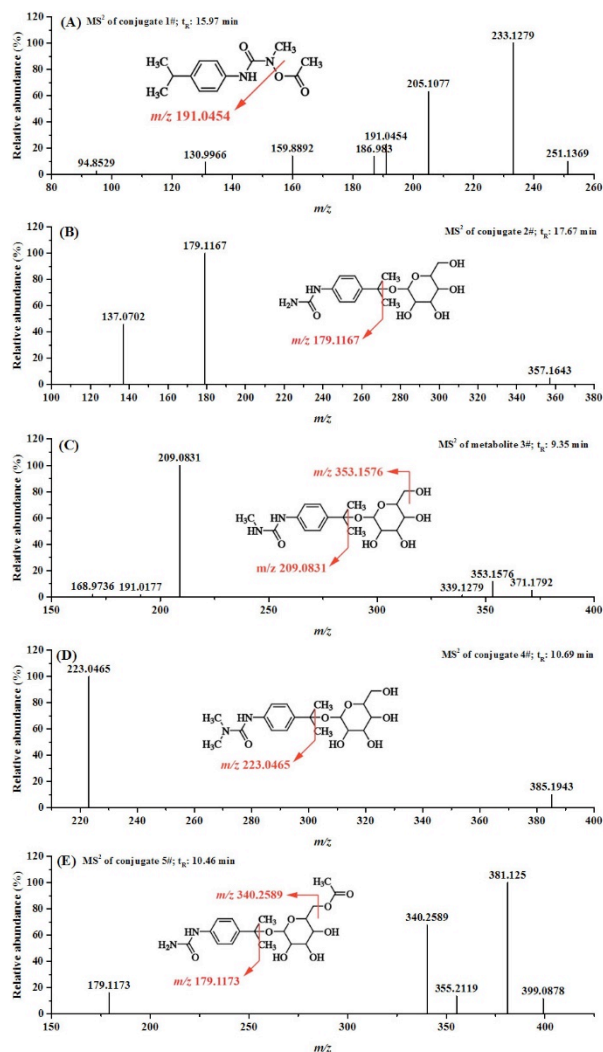

**Supplementary Figure S7.** MS<sup>2</sup> spectra of conjugates of IPU in rice from UHPLC LTQ Qorbitrap XL analysis. The ion data were obtained from (A) conjugate 1# with precursor ion  $m/z$  251.1369, (B) conjugate 2# with  $m/z$  precursor ion 357.1643, (C) conjugate 3# with precursor ion  $m/z$  371.1792, (D) conjugate 4# with precursor ion  $m/z$  385.1943, and (E) conjugate 5# with precursor ion  $m/z$  399.1730 of conjugates.

**ESI Table S1.**

Results from transcriptome analysis with reference genome of *Oryza sativa* cDNA using Solexa RNA paired-end sequencing

| Sample    | Raw Data |            | Valid Data |            |                   | Valid Ratio<br>(Base) |
|-----------|----------|------------|------------|------------|-------------------|-----------------------|
|           | Read     | Base       | Read       | Base       | Average<br>length |                       |
| Shoot+IPU | 26113896 | 2611389600 | 25735956   | 2562496108 | 99.56             | 98.12%                |
| Shoot-IPU | 29482952 | 2948295200 | 29038570   | 2891052202 | 99.55             | 98.05%                |
| Root+IPU  | 22209562 | 2220956200 | 21758504   | 2162612328 | 99.39             | 97.37%                |
| Root-IPU  | 24517652 | 2451765200 | 23983926   | 2380447568 | 99.25             | 97.09%                |

**ESI Table S2.**

Reads number based on the RNA-Seq data in four libraries of rice exposed to IPU.

| Libraries name | Clean reads <sup>a</sup> | Aligned ratio <sup>b</sup> |
|----------------|--------------------------|----------------------------|
| Shoot+IPU      | 12867978                 | 94.25%                     |
| Shoot-IPU      | 14519285                 | 94.45%                     |
| Root+IPU       | 10879252                 | 77.34%                     |
| Root-IPU       | 11991963                 | 72.36%                     |

<sup>a</sup>Clean reads which are filtered from dirty raw reads are mapped to reference sequences using soap2.21.

Mismatches no more than 2 bases are allowed in the alignment. Mapped reads are the sum of perfect match reads and less than 2 bp mismatch reads.

<sup>b</sup>Numbers enclosed in parenthesis represent the percent of reads in each library.

**ESI Table S3.**

Primer sequences used for real-time PCR analyses.

| Gene symbol  | Primer sequence |                         | Amplicon length<br>(bp) | E(%)  |
|--------------|-----------------|-------------------------|-------------------------|-------|
|              |                 | (5'-3')                 |                         |       |
| Os08t0547300 | S               | GTGATGTGGTCGGTGTTCCGG   | 20                      | 98.7  |
|              | A               | TCTTCTTGAGGTCAAAGGGTGC  | 22                      |       |
| Os08t0152400 | S               | TGACCGTGATGGAGCCGTTC    | 20                      | 101.3 |
|              | A               | GCTGAGGAAGTTGCCGAGGA    | 20                      |       |
| Os04t0206700 | S               | GCCGAAGGAGGCAGATTAC     | 19                      | 96.8  |
|              | A               | ACGCCAAGCAAGGTGAAGT     | 19                      |       |
| Os10t0555100 | S               | CCAGCCTTCTATGGATGTCTTC  | 22                      | 98.6  |
|              | A               | GCGATATGTCCCGTTGAGC     | 19                      |       |
| Os12t0123200 | S               | GGCTCCCTGTCGTATGTGATTC  | 22                      | 100.8 |
|              | A               | TGTCCAGAGGCAGCAGATGTT   | 21                      |       |
| Os07t0168300 | S               | AGTCCCAGGTCATCGTCCAGT   | 21                      | 91.7  |
|              | A               | CGCCGTGTAGAACGACCTGTT   | 21                      |       |
| Os09t0344500 | S               | GGCTCCCAGTAACAACAACATC  | 22                      | 94.3  |
|              | A               | TACCTTTCCTCCAGCATCCC    | 20                      |       |
| Os05t0102000 | S               | GTGGTTGAGCCTATGCTTGGAC  | 22                      | 99.7  |
|              | A               | GGTCGTTGTTGTGGCGGTAG    | 20                      |       |
| Os03t0273200 | S               | TGCCTCGCATTGCTTCTCC     | 19                      | 99.3  |
|              | A               | GTGCCAGTGGATGGTAATGTTG  | 22                      |       |
| Os01t0850700 | S               | AATGGTGGAGCCGGAATGT     | 19                      | 98.8  |
|              | A               | TGAAGAAGAGGTGCGTGTTGAGT | 23                      |       |
| Os01t0770500 | S               | GACCCATCGACTGGAAGAAC    | 20                      | 93.3  |
|              | A               | TCAAAGTGACCGAAGTAGCG    | 20                      |       |
| Os09t0472100 | S               | GCGTTGGCAGGAAGGTTAGG    | 20                      | 102.5 |
|              | A               | ACCGTCAGCGTGTTTCATCAG   | 20                      |       |

S and A represent sense and antisense;

E, amplification efficiency.

**ESI Table S4.**

Recoveries, RSD and detection limit of IPU in plant tissues.

| Sample | Added concentration<br>(mg kg <sup>-1</sup> ) | Recovery (%) |       |       | Average recovery<br>(%) | RSD (%) | IDL pg injected | MDL (mg kg <sup>-1</sup> ) | MQL (mg kg <sup>-1</sup> ) |
|--------|-----------------------------------------------|--------------|-------|-------|-------------------------|---------|-----------------|----------------------------|----------------------------|
|        |                                               | 1            | 2     | 3     |                         |         |                 |                            |                            |
| Shoot  | 0.5                                           | 95.7         | 101.3 | 92.2  | 96.4                    | 4.76    |                 |                            |                            |
|        | 1.0                                           | 107.7        | 104.5 | 108.2 | 106.8                   | 1.88    |                 | 0.0114                     | 0.0380                     |
|        | 5.0                                           | 106.9        | 105.7 | 101.4 | 104.7                   | 2.76    |                 |                            |                            |
| Root   | 0.5                                           | 104.3        | 91.0  | 96.5  | 97.3                    | 6.87    | 57.5            |                            |                            |
|        | 1.0                                           | 99.0         | 102.9 | 102.3 | 101.4                   | 2.07    |                 | 0.00371                    | 0.0124                     |
|        | 5.0                                           | 89.8         | 93.4  | 90.2  | 91.1                    | 2.17    |                 |                            |                            |

RSD, relative standard deviation;

IDL, instrumental detection limits;

MDL, method detection limits;

MQL, method quantification limits.

**ESI Table S5.** Top 200 annotated genes most up-regulation in shoots and roots in the presence of IPU and absence of IPU.

| Rank overall | Gene ID         | Shoot   |        |                        | R  | FDR      | Annotation                                                            |
|--------------|-----------------|---------|--------|------------------------|----|----------|-----------------------------------------------------------------------|
|              |                 | FPKM    |        | Log <sub>2</sub> Ratio |    |          |                                                                       |
|              |                 | Control | IPU    |                        |    |          |                                                                       |
| 1            | Os01t0729900-03 | 0.00    | 896.87 | Inf                    | up | 9.25E-14 | Conserved hypothetical protein.                                       |
| 2            | Os08t0473900-03 | 0.00    | 779.79 | Inf                    | up | 2.11E-13 | Similar to Alpha amylase isozyme 3D.                                  |
| 3            | Os01t0283100-02 | 0.00    | 475.15 | Inf                    | up | 2.83E-11 | Similar to Ferripyochelin-binding protein-like.                       |
| 4            | Os07t0179700-00 | 0.00    | 362.61 | Inf                    | up | 8.77E-10 | Hypothetical conserved gene.                                          |
| 5            | Os01t0186400-01 | 0.00    | 331.92 | Inf                    | up | 2.76E-09 | Hypothetical conserved gene.                                          |
| 6            | Os04t0488700-02 | 0.00    | 325.10 | Inf                    | up | 3.37E-09 | Similar to protein kinase KIPK.                                       |
| 7            | Os07t0204900-02 | 0.00    | 302.37 | Inf                    | up | 8.48E-09 | Similar to Zeta-carotene desaturase.                                  |
| 8            | Os04t0394200-03 | 0.00    | 251.22 | Inf                    | up | 6.89E-08 | Similar to 2-oxoglutarate dehydrogenase E2 subunit.                   |
| 9            | Os12t0504900-00 | 0.00    | 242.12 | Inf                    | up | 9.68E-08 | Glucoamylase, putative domain containing protein.                     |
| 10           | Os02t0775600-02 | 0.00    | 229.62 | Inf                    | up | 1.89E-07 | Zinc finger, C2H2-like domain containing protein.                     |
| 11           | Os11t0704600-02 | 0.00    | 214.84 | Inf                    | up | 4.05E-07 | Similar to Beta-1,3 glucanase precursor (EC 3.2.1.39).                |
| 12           | Os06t0129900-02 | 0.00    | 205.75 | Inf                    | up | 6.32E-07 | Similar to cytochrome P450.                                           |
| 13           | Os04t0440100-02 | 0.00    | 201.20 | Inf                    | up | 8.19E-07 | Similar to H0525C06.10 protein.                                       |
| 14           | Os02t0783700-01 | 0.00    | 178.47 | Inf                    | up | 2.81E-06 | Similar to Lysine ketoglutarate reductase/saccharopine dehydrogenase. |
| 15           | Os03t0729200-03 | 0.00    | 173.92 | Inf                    | up | 3.59E-06 | Similar to predicted protein.                                         |
| 16           | Os03t0165300-02 | 0.00    | 158.00 | Inf                    | up | 9.07E-06 | Homeobox domain containing protein.                                   |
| 17           | Os01t0621900-04 | 0.00    | 152.32 | Inf                    | up | 1.23E-05 | Hypothetical conserved gene.                                          |
| 18           | Os03t0758300-02 | 0.00    | 143.23 | Inf                    | up | 2.21E-05 | Similar to Cyclic nucleotide-gated ion channel 2 (Fragment).          |
| 19           | Os09t0323100-02 | 0.00    | 128.45 | Inf                    | up | 6.06E-05 | Zinc finger, RING/FYVE/PHD-type domain containing protein.            |
| 20           | Os03t0748000-02 | 0.00    | 125.04 | Inf                    | up | 7.48E-05 | Similar to YT521-B-like family protein, expressed.                    |
| 21           | Os06t0655500-02 | 0.00    | 125.04 | Inf                    | up | 7.48E-05 | Hypothetical conserved gene.                                          |
| 22           | Os05t0411300-02 | 0.00    | 123.90 | Inf                    | up | 8.08E-05 | Similar to DNA binding protein.                                       |
| 23           | Os06t0126000-05 | 0.00    | 118.22 | Inf                    | up | 1.29E-04 | Hypothetical conserved gene.                                          |



|    |                 |      |        |     |    |          |                                                                                                         |
|----|-----------------|------|--------|-----|----|----------|---------------------------------------------------------------------------------------------------------|
| 24 | Os10t0503700-02 | 0.00 | 115.95 | Inf | up | 1.49E-04 | Similar to ATP-dependent RNA helicase dhh1.                                                             |
| 25 | Os06t0663400-02 | 0.00 | 111.40 | Inf | up | 2.11E-04 | Serine/threonine protein kinase-like protein.                                                           |
| 26 | Os11t0113700-02 | 0.00 | 110.26 | Inf | up | 2.30E-04 | Serine/threonine protein kinase, Microbe-associated molecular pattern-induced defense signaling pathway |
| 27 | Os08t0473800-01 | 0.00 | 101.17 | Inf | up | 4.69E-04 | Similar to Alpha-amylase isozyme 3D precursor (EC 3.2.1.1).                                             |
| 28 | Os12t0113500-02 | 0.00 | 97.76  | Inf | up | 6.27E-04 | Serine/threonine protein kinase, Microbe-associated molecular pattern-induced defense signaling pathway |
| 29 | Os08t0110800-02 | 0.00 | 95.48  | Inf | up | 7.40E-04 | Hypothetical conserved gene.                                                                            |
| 30 | Os09t0490200-02 | 0.00 | 95.48  | Inf | up | 7.40E-04 | Similar to EIL3.                                                                                        |
| 31 | Os04t0670800-02 | 0.00 | 94.35  | Inf | up | 8.14E-04 | UBX domain containing protein.                                                                          |
| 32 | Os06t0335500-02 | 0.00 | 92.07  | Inf | up | 9.77E-04 | Similar to Auxin-responsive protein IAA21.                                                              |
| 33 | Os04t0414100-02 | 0.00 | 89.80  | Inf | up | 1.19E-03 | Similar to OSIGBa0137L20.4 protein.                                                                     |
| 34 | Os02t0326000-01 | 0.00 | 88.66  | Inf | up | 1.31E-03 | Protein of unknown function DUF2232, membrane domain containing protein.                                |
| 35 | Os01t0754500-02 | 0.00 | 87.53  | Inf | up | 1.44E-03 | Hypothetical conserved gene.                                                                            |
| 36 | Os01t0654100-03 | 0.00 | 86.39  | Inf | up | 1.58E-03 | Similar to CTP synthase.                                                                                |
| 37 | Os04t0441900-03 | 0.00 | 85.25  | Inf | up | 1.73E-03 | Similar to predicted protein.                                                                           |
| 38 | Os12t0459300-02 | 0.00 | 85.25  | Inf | up | 1.73E-03 | Hypothetical gene.                                                                                      |
| 39 | Os08t0517001-00 | 0.00 | 84.12  | Inf | up | 1.89E-03 | Hypothetical protein.                                                                                   |
| 40 | Os08t0556000-02 | 0.00 | 84.12  | Inf | up | 1.89E-03 | Similar to predicted protein.                                                                           |
| 41 | Os09t0459800-04 | 0.00 | 81.84  | Inf | up | 2.28E-03 | Similar to predicted protein.                                                                           |
| 42 | Os12t0439700-00 | 0.00 | 81.84  | Inf | up | 2.28E-03 | Similar to RER1A protein.                                                                               |
| 43 | Os10t0575200-03 | 0.00 | 79.57  | Inf | up | 2.77E-03 | Similar to GRV2 (KATAMARI2)%3B binding / heat shock protein binding.                                    |
| 44 | Os01t0958000-02 | 0.00 | 78.43  | Inf | up | 3.07E-03 | Similar to Cyclin-dependent kinase C-2.                                                                 |
| 45 | Os07t0681500-02 | 0.00 | 78.43  | Inf | up | 3.07E-03 | Similar to predicted protein.                                                                           |
| 46 | Os07t0467600-02 | 0.00 | 77.30  | Inf | up | 3.34E-03 | Similar to predicted protein.                                                                           |
| 47 | Os04t0571800-02 | 0.00 | 76.16  | Inf | up | 3.65E-03 | Zinc finger, RING/FYVE/PHD-type domain containing protein.                                              |
| 48 | Os09t0135800-02 | 0.00 | 76.16  | Inf | up | 3.65E-03 | Armadillo-like helical domain containing protein.                                                       |
| 49 | Os03t0227800-01 | 0.00 | 75.02  | Inf | up | 3.97E-03 | Conserved hypothetical protein.                                                                         |
| 50 | Os08t0422000-02 | 0.00 | 73.89  | Inf | up | 4.31E-03 | Similar to CM0545.530.nc protein (Fragment).                                                            |
| 51 | Os07t0204900-03 | 0.00 | 72.75  | Inf | up | 4.77E-03 | Similar to Zeta-carotene desaturase.                                                                    |

|    |                 |      |         |      |    |          |                                                                              |
|----|-----------------|------|---------|------|----|----------|------------------------------------------------------------------------------|
| 52 | Os11t0637700-02 | 0.00 | 72.75   | Inf  | up | 4.77E-03 | Nucleotide-binding, alpha-beta plait domain containing protein.              |
| 53 | Os01t0936100-02 | 0.00 | 71.61   | Inf  | up | 5.21E-03 | Similar to protein kinase family protein.                                    |
| 54 | Os03t0441500-02 | 0.00 | 71.61   | Inf  | up | 5.21E-03 | Similar to ABC transporter.                                                  |
| 55 | Os11t0240600-02 | 0.00 | 71.61   | Inf  | up | 5.21E-03 | Similar to gibberellin receptor GID1L2.                                      |
| 56 | Os06t0639100-03 | 0.00 | 70.48   | Inf  | up | 5.82E-03 | Similar to protein binding / zinc ion binding.                               |
| 57 | Os05t0132100-03 | 0.00 | 69.34   | Inf  | up | 6.34E-03 | Similar to cDNA clone:001-200-C01, full insert sequence.                     |
| 58 | Os06t0167100-02 | 0.00 | 69.34   | Inf  | up | 6.34E-03 | Similar to AP-1 complex subunit gamma-1.                                     |
| 59 | Os09t0308900-03 | 0.00 | 69.34   | Inf  | up | 6.34E-03 | Similar to lipid phosphate phosphatase 3.                                    |
| 60 | Os06t0535300-02 | 0.00 | 67.07   | Inf  | up | 7.87E-03 | Hypothetical conserved gene.                                                 |
| 61 | Os07t0484300-02 | 0.00 | 67.07   | Inf  | up | 7.87E-03 | Similar to protein binding protein.                                          |
| 62 | Os04t0650800-02 | 0.00 | 65.93   | Inf  | up | 8.67E-03 | Similar to H0212B02.14 protein.                                              |
| 63 | Os05t0494100-02 | 0.00 | 65.93   | Inf  | up | 8.67E-03 | Similar to dr1-associated corepressor.                                       |
| 64 | Os05t0283000-01 | 0.00 | 57.97   | Inf  | up | 1.77E-02 | Conserved hypothetical protein.                                              |
| 65 | Os06t0142650-00 | 0.00 | 57.97   | Inf  | up | 1.77E-02 | Similar to Avr9/Cf-9 rapidly elicited protein 11 (Fragment).                 |
| 66 | Os03t0374100-03 | 0.00 | 56.84   | Inf  | up | 1.97E-02 | Hepatocellular carcinoma-associated antigen 59 family protein.               |
| 67 | Os03t0360750-00 | 0.00 | 55.70   | Inf  | up | 2.19E-02 | Hypothetical protein.                                                        |
| 68 | Os03t0696300-02 | 0.00 | 54.56   | Inf  | up | 2.39E-02 | Similar to nuclear transcription factor Y subunit A-1.                       |
| 69 | Os01t0654100-02 | 0.00 | 53.43   | Inf  | up | 2.63E-02 | CTP synthase domain containing protein.                                      |
| 70 | Os04t0107900-04 | 0.00 | 52.29   | Inf  | up | 2.90E-02 | Similar to Heat shock protein 82.                                            |
| 71 | Os08t0132600-02 | 0.00 | 52.29   | Inf  | up | 2.90E-02 | Conserved hypothetical protein.                                              |
| 72 | Os08t0435750-00 | 0.00 | 52.29   | Inf  | up | 2.90E-02 | Non-protein coding transcript.                                               |
| 73 | Os11t0210300-02 | 0.00 | 52.29   | Inf  | up | 2.90E-02 | Similar to Alcohol dehydrogenase 1.                                          |
| 74 | Os01t0709500-03 | 0.00 | 51.15   | Inf  | up | 3.17E-02 | Similar to Serine/threonine-protein kinase PBS1 (EC 2.7.1.37)                |
| 75 | Os03t0245700-03 | 0.00 | 51.15   | Inf  | up | 3.17E-02 | Similar to senescence-associated protein 15.                                 |
| 76 | Os04t0660400-03 | 0.00 | 50.02   | Inf  | up | 3.57E-02 | Similar to Amylogenin%3B reversibly glycosylatable polypeptide (Amylogenin). |
| 77 | Os01t0917400-03 | 0.88 | 672.94  | 9.58 | up | 5.94E-12 | Hypothetical conserved gene.                                                 |
| 78 | Os06t0172901-00 | 0.88 | 650.20  | 9.53 | up | 7.78E-12 | Hypothetical protein.                                                        |
| 79 | Os04t0530500-02 | 3.52 | 1595.96 | 8.83 | up | 2.63E-13 | Zinc finger, RING/FYVE/PHD-type domain containing protein.                   |

|     |                 |        |          |      |    |          |                                                                                           |
|-----|-----------------|--------|----------|------|----|----------|-------------------------------------------------------------------------------------------|
| 80  | Os03t0648400-03 | 6.16   | 2761.10  | 8.81 | up | 3.75E-13 | Similar to DnaJ protein homolog (DNAJ-1).                                                 |
| 81  | Os04t0555300-02 | 0.88   | 294.41   | 8.39 | up | 6.67E-08 | Similar to Glycerol 3-phosphate permease.                                                 |
| 82  | Os12t0566700-02 | 0.88   | 222.80   | 7.98 | up | 1.46E-06 | Similar to GDSL-like Lipase/Acylhydrolase family protein, expressed.                      |
| 83  | Os12t0583900-03 | 0.88   | 209.16   | 7.89 | up | 2.81E-06 | Similar to PDE135 (PIGMENT DEFECTIVE EMBRYO 135)%3B transmembrane transporter.            |
| 84  | Os07t0573800-03 | 3.52   | 802.53   | 7.83 | up | 2.83E-11 | FMN-binding split barrel domain containing protein.                                       |
| 85  | Os12t0420200-02 | 1.76   | 334.20   | 7.57 | up | 6.32E-08 | Similar to CRB%3B binding / catalytic/ coenzyme binding.                                  |
| 86  | Os05t0583100-02 | 0.88   | 162.55   | 7.53 | up | 3.22E-05 | Similar to transposon protein.                                                            |
| 87  | Os03t0249700-02 | 3.52   | 635.43   | 7.50 | up | 3.30E-10 | Conserved hypothetical protein.                                                           |
| 88  | Os08t0473900-02 | 139.00 | 24912.38 | 7.49 | up | 2.02E-05 | Similar to Alpha amylase isozyme 3D.                                                      |
| 89  | Os02t0586900-02 | 2.64   | 422.86   | 7.32 | up | 1.15E-08 | Similar to Glycine rich protein (Fragment).                                               |
| 90  | Os01t0663800-02 | 0.88   | 131.86   | 7.23 | up | 2.23E-04 | Hypothetical conserved gene.                                                              |
| 91  | Os12t0550800-02 | 0.88   | 128.45   | 7.19 | up | 2.79E-04 | Conserved hypothetical protein.                                                           |
| 92  | Os12t0605800-03 | 1.76   | 251.22   | 7.16 | up | 1.42E-06 | Similar to Methylcrotonoyl-CoA carboxylase subunit alpha, mitochondrial.                  |
| 93  | Os01t0667200-02 | 0.88   | 98.89    | 6.81 | up | 2.25E-03 | Similar to Glyoxalase II.                                                                 |
| 94  | Os06t0193000-02 | 0.88   | 90.94    | 6.69 | up | 3.96E-03 | Similar to ubiquitin-conjugating enzyme E2 J2.                                            |
| 95  | Os10t0503500-03 | 0.88   | 90.94    | 6.69 | up | 3.96E-03 | Similar to Malic enzyme.                                                                  |
| 96  | Os08t0473900-01 | 47.50  | 4677.61  | 6.62 | up | 2.01E-08 | Alpha-amylase isozyme 3D precursor (EC 3.2.1.1) (1,4-alpha-D-glucan glucanohydrolase).    |
| 97  | Os12t0277500-04 | 2.64   | 253.49   | 6.59 | up | 3.40E-06 | Similar to RuBisCO large subunit-binding protein subunit alpha, chloroplastic (Fragment). |
| 98  | Os03t0826900-01 | 27.30  | 2479.19  | 6.51 | up | 1.90E-09 | Conserved hypothetical protein.                                                           |
| 99  | Os10t0360100-01 | 2.64   | 223.93   | 6.41 | up | 1.18E-05 | Similar to Sugar transporter protein.                                                     |
| 100 | Os03t0576900-05 | 1.76   | 139.82   | 6.31 | up | 3.92E-04 | Similar to cDNA clone:001-047-G03, full insert sequence.                                  |
| 101 | Os06t0194900-04 | 7.04   | 553.58   | 6.30 | up | 2.83E-08 | Similar to Sucrose synthase 2.                                                            |
| 102 | Os01t0229200-03 | 0.88   | 61.38    | 6.12 | up | 3.79E-02 | Hypothetical conserved gene.                                                              |
| 103 | Os11t0126900-01 | 0.88   | 61.38    | 6.12 | up | 3.79E-02 | NAC-domain protein, Drought tolerance                                                     |
| 104 | Os08t0190100-01 | 4.40   | 292.14   | 6.05 | up | 3.61E-06 | Germin-like protein 8-11, Disease resistance                                              |
| 105 | Os05t0581800-03 | 0.88   | 55.70    | 5.98 | up | 6.05E-02 | Hypothetical conserved gene.                                                              |
| 106 | Os08t0363200-01 | 0.88   | 55.70    | 5.98 | up | 6.05E-02 | Conserved hypothetical protein.                                                           |
| 107 | Os10t0580900-02 | 1.76   | 102.30   | 5.86 | up | 4.27E-03 | Conserved hypothetical protein.                                                           |

|     |                 |        |         |      |    |          |                                                                                           |
|-----|-----------------|--------|---------|------|----|----------|-------------------------------------------------------------------------------------------|
| 108 | Os06t0103300-02 | 5.28   | 304.64  | 5.85 | up | 4.38E-06 | Similar to Homogentisate 1,2-dioxygenase.                                                 |
| 109 | Os12t0437800-01 | 169.00 | 9422.28 | 5.80 | up | 1.17E-05 | Similar to MPI.                                                                           |
| 110 | Os12t0550800-01 | 11.40  | 628.61  | 5.78 | up | 8.24E-08 | Hypothetical conserved gene.                                                              |
| 111 | Os09t0243200-01 | 43.10  | 2182.50 | 5.66 | up | 6.32E-08 | Zinc finger, RING/FYVE/PHD-type domain containing protein.                                |
| 112 | Os01t0729900-04 | 8.80   | 439.91  | 5.64 | up | 8.43E-07 | Similar to predicted protein.                                                             |
| 113 | Os01t0159000-01 | 39.60  | 1946.07 | 5.62 | up | 6.32E-08 | Similar to cDNA clone:J023049H21, full insert sequence.                                   |
| 114 | Os07t0496200-03 | 1.76   | 86.39   | 5.62 | up | 1.28E-02 | Similar to Malic enzyme.                                                                  |
| 115 | Os04t0570800-01 | 6.16   | 294.41  | 5.58 | up | 1.15E-05 | Protein of unknown function DUF248, methyltransferase putative family protein.            |
| 116 | Os02t0483500-01 | 11.40  | 496.75  | 5.44 | up | 8.90E-07 | Transferase family protein.                                                               |
| 117 | Os08t0518100-02 | 2.64   | 113.67  | 5.43 | up | 4.19E-03 | Hypothetical conserved gene.                                                              |
| 118 | Os01t0793800-01 | 16.70  | 716.13  | 5.42 | up | 2.20E-07 | Conserved hypothetical protein.                                                           |
| 119 | Os12t0467700-02 | 1.76   | 73.89   | 5.39 | up | 3.02E-02 | Similar to ATPase 2.                                                                      |
| 120 | Os12t0468000-02 | 1.76   | 73.89   | 5.39 | up | 3.02E-02 | Similar to ATPase 2.                                                                      |
| 121 | Os06t0559500-02 | 2.64   | 107.99  | 5.35 | up | 5.91E-03 | Similar to Acid phosphatase (EC 3.1.3.2) 1 allozyme 1.                                    |
| 122 | Os12t0277500-03 | 5.28   | 214.84  | 5.35 | up | 1.44E-04 | Similar to RuBisCO large subunit-binding protein subunit alpha, chloroplastic (Fragment). |
| 123 | Os07t0529000-01 | 144.00 | 5654.05 | 5.29 | up | 9.58E-06 | Similar to Isocitrate lyase (Fragment).                                                   |
| 124 | Os03t0178200-02 | 1.76   | 68.20   | 5.28 | up | 4.63E-02 | Protein of unknown function YGGT family protein.                                          |
| 125 | Os02t0546600-01 | 1.76   | 67.07   | 5.25 | up | 5.04E-02 | Similar to AP2 domain containing protein RAP2.2 (Fragment).                               |
| 126 | Os05t0151400-02 | 4.40   | 155.73  | 5.15 | up | 1.38E-03 | Similar to TOC159 (PLASMID PROTEIN IMPORT 2).                                             |
| 127 | Os02t0514500-01 | 15.80  | 556.99  | 5.14 | up | 1.70E-06 | Similar to Glycerophosphoryl diester phosphodesterase (Fragment).                         |
| 128 | Os04t0636900-01 | 2.64   | 89.80   | 5.09 | up | 1.92E-02 | RNA-binding region RNP-1 (RNA recognition motif) domain containing protein.               |
| 129 | Os04t0679400-03 | 15.00  | 489.93  | 5.03 | up | 4.15E-06 | Similar to H0801D08.15 protein.                                                           |
| 130 | Os01t0839900-01 | 10.60  | 341.02  | 5.01 | up | 2.51E-05 | Thaumatococcus, pathogenesis-related family protein.                                      |
| 131 | Os03t0751100-02 | 1.76   | 56.84   | 5.01 | up | 1.08E-01 | Similar to Glutathione transporter.                                                       |
| 132 | Os06t0114650-01 | 1.76   | 54.56   | 4.95 | up | 1.29E-01 | Similar to predicted protein.                                                             |
| 133 | Os03t0656800-02 | 3.52   | 106.85  | 4.92 | up | 1.13E-02 | Similar to 3-glucanase.                                                                   |
| 134 | Os04t0486950-01 | 268.00 | 8145.74 | 4.92 | up | 1.47E-04 | Similar to Malate synthase.                                                               |
| 135 | Os08t0189600-01 | 4.40   | 128.45  | 4.87 | up | 5.39E-03 | Germin-like protein 8-7, Disease resistance                                               |

|     |                 |        |          |      |    |          |                                                             |
|-----|-----------------|--------|----------|------|----|----------|-------------------------------------------------------------|
| 136 | Os02t0719800-01 | 1.76   | 51.15    | 4.86 | up | 1.66E-01 | Similar to AML1.                                            |
| 137 | Os03t0291500-01 | 640.00 | 18061.36 | 4.82 | up | 3.38E-03 | Similar to Asparagine synthetase.                           |
| 138 | Os05t0223200-01 | 17.60  | 489.93   | 4.80 | up | 1.03E-05 | Similar to Glycine-rich RNA-binding protein GRP2A.          |
| 139 | Os05t0588900-01 | 5.28   | 145.50   | 4.78 | up | 3.68E-03 | Similar to mitochondrial chaperone BCS1.                    |
| 140 | Os08t0189900-01 | 17.60  | 478.56   | 4.77 | up | 1.23E-05 | Germin-like protein 8-10, Disease resistance                |
| 141 | Os08t0230600-01 | 12.30  | 328.51   | 4.74 | up | 7.48E-05 | LIM, zinc-binding domain containing protein.                |
| 142 | Os03t0727800-01 | 9.68   | 258.04   | 4.74 | up | 2.55E-04 | Cyclin-like F-box domain containing protein.                |
| 143 | Os01t0934000-02 | 2.64   | 68.20    | 4.69 | up | 7.94E-02 | WD40 repeat-like domain containing protein.                 |
| 144 | Os10t0447400-01 | 2.64   | 67.07    | 4.67 | up | 8.64E-02 | Conserved hypothetical protein.                             |
| 145 | Os04t0175400-01 | 40.50  | 1024.19  | 4.66 | up | 3.61E-06 | Conserved hypothetical protein.                             |
| 146 | Os03t0136900-02 | 5.28   | 128.45   | 4.60 | up | 8.61E-03 | Similar to Aconitate hydratase 2, mitochondrial.            |
| 147 | Os01t0703000-01 | 5.28   | 127.31   | 4.59 | up | 9.08E-03 | Similar to Poly(A) polymerase gamma (EC 2.7.7.19)           |
| 148 | Os04t0688300-01 | 187.00 | 4467.31  | 4.58 | up | 7.04E-05 | Haem peroxidase, plant/fungal/bacterial family protein.     |
| 149 | Os06t0172800-00 | 568.00 | 13289.41 | 4.55 | up | 2.59E-03 | Similar to alkaline alpha galactosidase 2.                  |
| 150 | Os10t0370600-01 | 2.64   | 60.25    | 4.51 | up | 1.39E-01 | Hypothetical protein.                                       |
| 151 | Os11t0205300-00 | 5.28   | 114.81   | 4.44 | up | 1.77E-02 | Non-protein coding transcript.                              |
| 152 | Os02t0611200-03 | 22.90  | 496.75   | 4.44 | up | 3.84E-05 | Similar to S-adenosylmethionine decarboxylase 2.            |
| 153 | Os04t0461100-02 | 6.16   | 131.86   | 4.42 | up | 1.09E-02 | Similar to H0219H12.12 protein.                             |
| 154 | Os08t0158400-00 | 2.64   | 55.70    | 4.40 | up | 1.93E-01 | Similar to Berberine bridge enzyme-like protein.            |
| 155 | Os09t0515200-02 | 7.04   | 145.50   | 4.37 | up | 8.13E-03 | Beta 7 subunit of 20S proteasome.                           |
| 156 | Os01t0770500-02 | 2.64   | 54.56    | 4.37 | up | 2.08E-01 | Similar to ABC transporter ATP-binding protein.             |
| 157 | Os01t0827800-00 | 2.64   | 54.56    | 4.37 | up | 2.08E-01 | Similar to AT-rich element binding factor 3.                |
| 158 | Os03t0663500-00 | 2.64   | 54.56    | 4.37 | up | 2.08E-01 | Similar to Osmotin precursor.                               |
| 159 | Os12t0583700-00 | 41.30  | 844.58   | 4.35 | up | 1.69E-05 | Zinc finger, C2H2-type domain containing protein.           |
| 160 | Os02t0214500-01 | 2.64   | 53.43    | 4.34 | up | 2.23E-01 | No apical meristem (NAM) protein domain containing protein. |
| 161 | Os01t0138800-01 | 25.50  | 505.84   | 4.31 | up | 6.21E-05 | Peptidase C26 domain containing protein.                    |
| 162 | Os07t0551400-02 | 13.20  | 261.45   | 4.31 | up | 8.53E-04 | Similar to USP family protein.                              |
| 163 | Os02t0514326-00 | 2.64   | 52.29    | 4.31 | up | 2.37E-01 | Hypothetical protein.                                       |

|     |                 |         |          |      |    |          |                                                                          |
|-----|-----------------|---------|----------|------|----|----------|--------------------------------------------------------------------------|
| 164 | Os02t0771500-01 | 4.40    | 86.39    | 4.30 | up | 5.84E-02 | Conserved hypothetical protein.                                          |
| 165 | Os03t0133100-01 | 42.20   | 812.76   | 4.27 | up | 2.59E-05 | Conserved hypothetical protein.                                          |
| 166 | Os03t0255100-02 | 16.70   | 319.42   | 4.26 | up | 4.29E-04 | Similar to Beta-galactosidase.                                           |
| 167 | Os05t0475400-01 | 514.00  | 9675.77  | 4.24 | up | 2.67E-03 | Similar to Alanine:glyoxylate aminotransferase-like protein (Fragment).  |
| 168 | Os08t0507100-00 | 5.28    | 98.89    | 4.23 | up | 4.07E-02 | Cytochrome P450 family protein.                                          |
| 169 | Os05t0372100-05 | 6.16    | 114.81   | 4.22 | up | 2.51E-02 | Similar to protein kinase family protein.                                |
| 170 | Os06t0594300-01 | 4.40    | 81.84    | 4.22 | up | 7.65E-02 | Hypothetical protein.                                                    |
| 171 | Os10t0431900-02 | 3.52    | 63.66    | 4.18 | up | 1.66E-01 | Serine/threonine protein kinase-related domain containing protein.       |
| 172 | Os12t0255850-01 | 3.52    | 63.66    | 4.18 | up | 1.66E-01 | Conserved hypothetical protein.                                          |
| 173 | Os02t0168200-01 | 6.16    | 109.13   | 4.15 | up | 3.29E-02 | Similar to Transfactor-like protein.                                     |
| 174 | Os01t0594300-01 | 10.60   | 186.42   | 4.14 | up | 5.06E-03 | Similar to leucine-rich repeat family protein / extensin family protein. |
| 175 | Os02t0285800-02 | 10.60   | 186.42   | 4.14 | up | 5.06E-03 | Similar to predicted protein.                                            |
| 176 | Os05t0475475-00 | 79.20   | 1367.48  | 4.11 | up | 4.78E-05 | Hypothetical gene.                                                       |
| 177 | Os05t0473000-01 | 16.70   | 276.22   | 4.05 | up | 1.52E-03 | Streptomyces cyclase/dehydrase family protein.                           |
| 178 | Os05t0455200-02 | 3.52    | 57.97    | 4.04 | up | 2.35E-01 | Similar to QSH-1.                                                        |
| 179 | Os02t0192001-00 | 7.92    | 127.31   | 4.01 | up | 2.55E-02 | Conserved hypothetical protein.                                          |
| 180 | Os11t0149200-00 | 6.16    | 98.89    | 4.01 | up | 5.73E-02 | Conserved hypothetical protein.                                          |
| 181 | Os03t0770851-00 | 5.28    | 81.84    | 3.95 | up | 1.07E-01 | Hypothetical protein.                                                    |
| 182 | Os07t0608300-02 | 15.00   | 228.48   | 3.93 | up | 4.11E-03 | Alpha/beta hydrolase fold-1 domain containing protein.                   |
| 183 | Os02t0482400-01 | 5.28    | 79.57    | 3.91 | up | 1.22E-01 | Similar to Ornithine decarboxylase (EC 4.1.1.17) (ODC).                  |
| 184 | Os05t0125600-02 | 3.52    | 52.29    | 3.89 | up | 3.35E-01 | Non-protein coding transcript.                                           |
| 185 | Os08t0476050-01 | 3.52    | 52.29    | 3.89 | up | 3.35E-01 | Hypothetical conserved gene.                                             |
| 186 | Os05t0145100-01 | 4.40    | 64.79    | 3.88 | up | 2.16E-01 | Conserved hypothetical protein.                                          |
| 187 | Os06t0561000-01 | 2020.00 | 29658.19 | 3.88 | up | 1.13E-01 | Similar to Myo-inositol oxygenase.                                       |
| 188 | Os02t0514150-00 | 3.52    | 51.15    | 3.86 | up | 3.62E-01 | Hypothetical conserved gene.                                             |
| 189 | Os04t0108101-00 | 5.28    | 76.16    | 3.85 | up | 1.50E-01 | Hypothetical protein.                                                    |
| 190 | Os07t0561800-01 | 5.28    | 76.16    | 3.85 | up | 1.50E-01 | Similar to carbohydrate transporter/ sugar porter.                       |
| 191 | Os01t0884350-00 | 8.80    | 125.04   | 3.83 | up | 3.71E-02 | Hypothetical protein.                                                    |

|     |                 |         |          |      |    |          |                                                                                |
|-----|-----------------|---------|----------|------|----|----------|--------------------------------------------------------------------------------|
| 192 | Os01t0327100-02 | 7.04    | 98.89    | 3.81 | up | 7.66E-02 | Similar to Peroxidase 8.                                                       |
| 193 | Os05t0171900-01 | 1000.00 | 13988.49 | 3.81 | up | 2.19E-02 | Glyoxalase/bleomycin resistance protein/dioxygenase domain containing protein. |
| 194 | Os03t0708800-03 | 7.04    | 97.76    | 3.80 | up | 8.07E-02 | Hypothetical conserved gene.                                                   |
| 195 | Os06t0703900-02 | 4.40    | 60.25    | 3.78 | up | 2.76E-01 | Homeodomain-like containing protein.                                           |
| 196 | Os05t0222200-02 | 13.20   | 179.60   | 3.77 | up | 1.42E-02 | ABC transporter-like domain containing protein.                                |
| 197 | Os10t0565200-00 | 18.50   | 243.26   | 3.72 | up | 5.91E-03 | Hypothetical conserved gene.                                                   |
| 198 | Os06t0152200-02 | 10.60   | 136.41   | 3.69 | up | 3.71E-02 | Zinc-finger protein R2931.                                                     |
| 199 | Os10t0456800-01 | 662.00  | 8470.85  | 3.68 | up | 1.07E-02 | Similar to PGPD14 protein.                                                     |
| 200 | Os10t0492600-01 | 38.70   | 493.34   | 3.67 | up | 8.92E-04 | Similar to Tonoplast membrane integral protein ZmTIP3-1.                       |

| Rank<br>Overall | Gene ID         | Root    |     | Log <sub>2</sub> Ratio | R <sup>a</sup> | FDR      | Annotation                                                                                 |
|-----------------|-----------------|---------|-----|------------------------|----------------|----------|--------------------------------------------------------------------------------------------|
|                 |                 | FPKM    |     |                        |                |          |                                                                                            |
|                 |                 | Control | IPU |                        |                |          |                                                                                            |
| 1               | Os01t0142800-03 | 0       | 205 | Inf                    | up             | 2.93E-09 | Similar to Peptide transporter.                                                            |
| 2               | Os01t0148700-02 | 0       | 95  | Inf                    | up             | 5.58E-05 | Protein of unknown function DUF1677, Oryza sativa family protein.                          |
| 3               | Os01t0550300-01 | 0       | 51  | Inf                    | up             | 1.11E-02 | Similar to Gda-1 protein.                                                                  |
| 4               | Os01t0686800-01 | 0       | 165 | Inf                    | up             | 7.11E-08 | Protein containing the WD-40 repeat, Innate immunity                                       |
| 5               | Os01t0730300-03 | 0       | 59  | Inf                    | up             | 3.96E-03 | Similar to predicted protein.                                                              |
| 6               | Os01t0800300-03 | 0       | 52  | Inf                    | up             | 9.70E-03 | Immunoglobulin/major histocompatibility complex, conserved site domain containing protein. |
| 7               | Os02t0768600-01 | 0       | 56  | Inf                    | up             | 5.76E-03 | Similar to Chloroplast inorganic pyrophosphatase (EC 3.6.1.1).                             |
| 8               | Os02t0822000-03 | 0       | 70  | Inf                    | up             | 1.04E-03 | Hypothetical conserved gene.                                                               |
| 9               | Os03t0269000-02 | 0       | 72  | Inf                    | up             | 8.34E-04 | Short chain alcohol dehydrogenase-like.                                                    |
| 10              | Os03t0289200-02 | 0       | 71  | Inf                    | up             | 9.44E-04 | Similar to protein YIP1.                                                                   |
| 11              | Os03t0669300-03 | 0       | 109 | Inf                    | up             | 1.23E-05 | Glycoside hydrolase, family 17 protein.                                                    |
| 12              | Os03t0713400-03 | 0       | 66  | Inf                    | up             | 1.67E-03 | Similar to NADH-ubiquinone oxidoreductase 75 kDa subunit.                                  |
| 13              | Os03t0796600-02 | 0       | 84  | Inf                    | up             | 1.92E-04 | Non-protein coding transcript.                                                             |
| 14              | Os03t0797700-02 | 0       | 67  | Inf                    | up             | 1.48E-03 | rRNA-processing protein EFG1 domain containing protein.                                    |
| 15              | Os03t0821900-02 | 0       | 60  | Inf                    | up             | 3.48E-03 | Similar to Protein kinase APK1B.                                                           |
| 16              | Os03t0851800-02 | 0       | 54  | Inf                    | up             | 7.49E-03 | Similar to Pantoate--beta-alanine ligase.                                                  |

|    |                 |   |     |      |    |          |                                                                                          |
|----|-----------------|---|-----|------|----|----------|------------------------------------------------------------------------------------------|
| 17 | Os04t0129500-03 | 0 | 88  | Inf  | up | 1.24E-04 | Similar to OSIGBa0131J24.5 protein.                                                      |
| 18 | Os04t0401700-02 | 0 | 250 | Inf  | up | 1.15E-10 | Similar to Isoform 2 of Potassium transporter 1.                                         |
| 19 | Os04t0504800-03 | 0 | 65  | Inf  | up | 1.87E-03 | Similar to polyadenylate-binding protein 2.                                              |
| 20 | Os04t0573200-02 | 0 | 191 | Inf  | up | 8.69E-09 | Similar to OSIGBa0147H17.7 protein.                                                      |
| 21 | Os04t0678250-00 | 0 | 79  | Inf  | up | 3.55E-04 | Hypothetical protein.                                                                    |
| 22 | Os04t0693000-02 | 0 | 106 | Inf  | up | 1.71E-05 | Similar to dolichyl-diphosphooligosaccharide--protein glycosyltransferase 67 kDasubunit. |
| 23 | Os05t0149800-02 | 0 | 139 | Inf  | up | 6.48E-07 | Similar to Discordia 1.                                                                  |
| 24 | Os05t0411300-03 | 0 | 60  | Inf  | up | 3.48E-03 | Similar to DNA binding protein.                                                          |
| 25 | Os05t0455600-02 | 0 | 179 | Inf  | up | 2.22E-08 | Prenylated rab acceptor PRA1 family protein.                                             |
| 26 | Os06t0573600-03 | 0 | 147 | Inf  | up | 3.30E-07 | Similar to Beta-galactosidase.                                                           |
| 27 | Os07t0100500-02 | 0 | 52  | Inf  | up | 9.70E-03 | Conserved hypothetical protein.                                                          |
| 28 | Os07t0170100-02 | 0 | 335 | Inf  | up | 4.61E-13 | Similar to Branched chain alpha-keto acid dehydrogenase E1 beta subunit.                 |
| 29 | Os07t0516500-04 | 0 | 52  | Inf  | up | 9.70E-03 | Hypothetical conserved gene.                                                             |
| 30 | Os07t0566200-02 | 0 | 124 | Inf  | up | 2.76E-06 | Similar to catalytic/ protein phosphatase type 2C.                                       |
| 31 | Os08t0224100-03 | 0 | 67  | Inf  | up | 1.48E-03 | Similar to Serine/threonine protein kinase.                                              |
| 32 | Os08t0518100-02 | 0 | 72  | Inf  | up | 8.34E-04 | Hypothetical conserved gene.                                                             |
| 33 | Os08t0532200-03 | 0 | 60  | Inf  | up | 3.48E-03 | Similar to Glutamate-1-semialdehyde aminotransferase (GSA- AT).                          |
| 34 | Os09t0459800-02 | 0 | 69  | Inf  | up | 1.15E-03 | Similar to ARP protein.                                                                  |
| 35 | Os09t0497400-02 | 0 | 136 | Inf  | up | 8.31E-07 | Similar to Protein pob.                                                                  |
| 36 | Os09t0567400-02 | 0 | 76  | Inf  | up | 5.06E-04 | Similar to Histidine-containing phosphotransfer protein.                                 |
| 37 | Os11t0210500-02 | 0 | 316 | Inf  | up | 1.33E-12 | Similar to Alcohol dehydrogenase.                                                        |
| 38 | Os11t0472000-02 | 0 | 78  | Inf  | up | 3.96E-04 | Hypothetical conserved gene.                                                             |
| 39 | Os11t0702700-02 | 0 | 84  | Inf  | up | 1.92E-04 | Homeodomain-like containing protein.                                                     |
| 40 | Os12t0515400-02 | 0 | 94  | Inf  | up | 6.26E-05 | Similar to plastidic 2-oxoglutarate/malate transporter.                                  |
| 41 | Os03t0784900-02 | 2 | 532 | 8.06 | up | 3.11E-15 | Glycolipid transfer protein, GLTP domain containing protein.                             |
| 42 | Os03t0158500-04 | 2 | 438 | 7.77 | up | 1.99E-13 | Similar to YT521-B-like family protein, expressed.                                       |
| 43 | Os03t0151800-03 | 1 | 189 | 7.56 | up | 7.11E-08 | Hypothetical conserved gene.                                                             |
| 44 | Os03t0437600-02 | 2 | 259 | 7.02 | up | 2.50E-09 | Similar to Hydrolase.                                                                    |



|    |                 |    |     |      |    |          |                                                                                       |
|----|-----------------|----|-----|------|----|----------|---------------------------------------------------------------------------------------|
| 45 | Os11t0384789-02 | 2  | 259 | 7.02 | up | 2.50E-09 | Similar to Hydrolase.                                                                 |
| 46 | Os08t0416900-02 | 1  | 106 | 6.73 | up | 9.62E-05 | Similar to dnaJ domain containing protein.                                            |
| 47 | Os05t0372100-04 | 1  | 88  | 6.46 | up | 6.45E-04 | Similar to protein kinase family protein.                                             |
| 48 | Os01t0754200-02 | 1  | 78  | 6.29 | up | 1.85E-03 | Similar to ATGSL05 (GLUCAN SYNTHASE-LIKE 5)%3B 1,3-beta-glucan synthase/ transferase. |
| 49 | Os05t0169100-02 | 8  | 595 | 6.22 | up | 3.51E-13 | Similar to 60S ribosomal protein L10-2.                                               |
| 50 | Os04t0449950-00 | 1  | 70  | 6.13 | up | 4.53E-03 | Non-protein coding transcript.                                                        |
| 51 | Os02t0288200-02 | 1  | 66  | 6.04 | up | 7.02E-03 | Hypothetical conserved gene.                                                          |
| 52 | Os08t0224200-02 | 1  | 64  | 6.00 | up | 9.03E-03 | Similar to H0702G05.3 protein.                                                        |
| 53 | Os05t0594100-02 | 3  | 190 | 5.98 | up | 8.22E-07 | Similar to GDA2 protein.                                                              |
| 54 | Os10t0571200-02 | 1  | 63  | 5.98 | up | 9.93E-03 | Similar to Pyruvate kinase.                                                           |
| 55 | Os10t0412100-02 | 1  | 59  | 5.88 | up | 1.58E-02 | Similar to Endonuclease/Exonuclease/phosphatase family protein, expressed.            |
| 56 | Os01t0936100-02 | 1  | 55  | 5.78 | up | 2.45E-02 | Similar to protein kinase family protein.                                             |
| 57 | Os07t0639800-02 | 6  | 326 | 5.76 | up | 3.61E-09 | Similar to Eukaryotic translation initiation factor 6 (Fragment).                     |
| 58 | Os03t0802300-02 | 1  | 54  | 5.75 | up | 2.74E-02 | Conserved hypothetical protein.                                                       |
| 59 | Os08t0155400-03 | 2  | 107 | 5.74 | up | 3.02E-04 | Similar to cDNA clone:J023045B01, full insert sequence.                               |
| 60 | Os01t0645200-03 | 2  | 95  | 5.57 | up | 9.91E-04 | Bile acid:sodium symporter domain containing protein.                                 |
| 61 | Os07t0424400-03 | 10 | 449 | 5.49 | up | 3.34E-10 | Similar to cDNA clone:J023086F23, full insert sequence.                               |
| 62 | Os03t0165300-02 | 2  | 88  | 5.46 | up | 1.91E-03 | Homeobox domain containing protein.                                                   |
| 63 | Os07t0600700-02 | 2  | 76  | 5.25 | up | 6.54E-03 | X8 domain containing protein.                                                         |
| 64 | Os03t0271200-02 | 2  | 67  | 5.07 | up | 1.68E-02 | Similar to Protein TOC75, chloroplastic.                                              |
| 65 | Os04t0630600-00 | 2  | 64  | 5.00 | up | 2.25E-02 | Similar to H0323C08.16 protein.                                                       |
| 66 | Os08t0556900-02 | 8  | 254 | 4.99 | up | 7.91E-07 | Similar to Vignain.                                                                   |
| 67 | Os04t0555300-02 | 8  | 239 | 4.90 | up | 1.94E-06 | Similar to Glycerol 3-phosphate permease.                                             |
| 68 | Os07t0682400-03 | 10 | 257 | 4.68 | up | 2.31E-06 | Nucleotide-binding, alpha-beta plait domain containing protein.                       |
| 69 | Os06t0189600-03 | 3  | 76  | 4.66 | up | 1.44E-02 | Protein of unknown function DUF1677, Oryza sativa family protein.                     |
| 70 | Os07t0498300-02 | 7  | 171 | 4.61 | up | 8.43E-05 | Similar to cDNA clone:001-022-F09, full insert sequence.                              |
| 71 | Os06t0639100-03 | 3  | 72  | 4.58 | up | 2.08E-02 | Similar to protein binding / zinc ion binding.                                        |
| 72 | Os05t0372100-05 | 6  | 128 | 4.42 | up | 1.12E-03 | Similar to protein kinase family protein.                                             |

|     |                 |     |      |      |    |          |                                                                                        |
|-----|-----------------|-----|------|------|----|----------|----------------------------------------------------------------------------------------|
| 73  | Os02t0104200-02 | 6   | 127  | 4.40 | up | 1.17E-03 | Conserved hypothetical protein.                                                        |
| 74  | Os01t0598600-03 | 3   | 53   | 4.14 | up | 1.26E-01 | Similar to predicted protein.                                                          |
| 75  | Os05t0461300-02 | 27  | 454  | 4.07 | up | 5.15E-07 | Similar to RAB8C.                                                                      |
| 76  | Os07t0568300-02 | 9   | 143  | 3.99 | up | 1.74E-03 | Similar to ZF protein (Fragment).                                                      |
| 77  | Os02t0215200-03 | 4   | 57   | 3.83 | up | 1.42E-01 | Similar to Histone deacetylase.                                                        |
| 78  | Os01t0814400-02 | 5   | 71   | 3.83 | up | 6.87E-02 | Conserved hypothetical protein.                                                        |
| 79  | Os08t0473900-01 | 13  | 182  | 3.81 | up | 7.88E-04 | Alpha-amylase isozyme 3D precursor (EC 3.2.1.1) (1,4-alpha-D-glucan glucanohydrolase). |
| 80  | Os05t0102800-01 | 7   | 91   | 3.70 | up | 3.20E-02 | Similar to AML1.                                                                       |
| 81  | Os09t0484300-03 | 7   | 85   | 3.60 | up | 5.27E-02 | Similar to Polyubiquitin-like protein.                                                 |
| 82  | Os03t0283600-02 | 6   | 72   | 3.58 | up | 9.59E-02 | Similar to CDP-diacylglycerol--glycerol-3-phosphate 3-phosphatidyltransferase.         |
| 83  | Os04t0488800-00 | 7   | 82   | 3.55 | up | 6.49E-02 | Conserved hypothetical protein.                                                        |
| 84  | Os02t0586000-01 | 318 | 3556 | 3.48 | up | 1.35E-07 | Quinonprotein alcohol dehydrogenase-like domain containing protein.                    |
| 85  | Os07t0568600-02 | 11  | 123  | 3.48 | up | 1.48E-02 | Similar to calcium-dependent protein kinase, isoform AK1.                              |
| 86  | Os08t0135800-01 | 5   | 55   | 3.46 | up | 2.44E-01 | Zinc finger, CCCH-type domain containing protein.                                      |
| 87  | Os03t0130350-00 | 8   | 87   | 3.44 | up | 6.42E-02 | Similar to predicted protein.                                                          |
| 88  | Os01t0719100-03 | 5   | 52   | 3.38 | up | 3.08E-01 | Hypothetical gene.                                                                     |
| 89  | Os12t0277000-02 | 6   | 62   | 3.37 | up | 2.02E-01 | Hypothetical conserved gene.                                                           |
| 90  | Os04t0650700-01 | 7   | 71   | 3.34 | up | 1.43E-01 | Similar to OSIGBa0113E10.3 protein.                                                    |
| 91  | Os04t0458200-02 | 19  | 189  | 3.31 | up | 3.48E-03 | Similar to cDNA clone:J033037C08, full insert sequence.                                |
| 92  | Os01t0975300-02 | 13  | 127  | 3.29 | up | 2.14E-02 | Similar to Myb factor protein.                                                         |
| 93  | Os03t0376900-02 | 13  | 125  | 3.27 | up | 2.43E-02 | Nucleotide-binding, alpha-beta plait domain containing protein.                        |
| 94  | Os06t0559400-02 | 39  | 370  | 3.25 | up | 1.74E-04 | Conserved hypothetical protein.                                                        |
| 95  | Os10t0504650-00 | 7   | 65   | 3.22 | up | 2.21E-01 | Similar to nonspecific lipid-transfer protein.                                         |
| 96  | Os05t0571000-02 | 6   | 54   | 3.17 | up | 3.59E-01 | Similar to SPA1 (SUPPRESSOR OF PHYA-105 1)%3B protein binding / signal transducer.     |
| 97  | Os02t0817800-02 | 9   | 77   | 3.10 | up | 1.70E-01 | Similar to Telomere binding protein-1.                                                 |
| 98  | Os07t0501900-03 | 9   | 77   | 3.10 | up | 1.70E-01 | Similar to zinc finger family protein.                                                 |
| 99  | Os04t0650700-02 | 786 | 6491 | 3.05 | up | 9.26E-06 | Similar to OSIGBa0113E10.3 protein.                                                    |
| 100 | Os09t0504700-03 | 10  | 81   | 3.02 | up | 1.70E-01 | Zinc finger, RING/FYVE/PHD-type domain containing protein.                             |

|     |                 |     |      |      |    |          |                                                           |
|-----|-----------------|-----|------|------|----|----------|-----------------------------------------------------------|
| 101 | Os11t0525200-02 | 10  | 78   | 2.96 | up | 2.04E-01 | Similar to Cytochrome P450 51 (EC 1.14.13.70) (CYPLI)     |
| 102 | Os04t0650800-02 | 32  | 241  | 2.91 | up | 5.75E-03 | Similar to H0212B02.14 protein.                           |
| 103 | Os02t0247600-01 | 15  | 112  | 2.90 | up | 8.70E-02 | Conserved hypothetical protein.                           |
| 104 | Os01t0760300-01 | 14  | 103  | 2.88 | up | 1.15E-01 | Similar to Pollen-specific kinase partner protein.        |
| 105 | Os11t0135000-01 | 10  | 73   | 2.87 | up | 2.75E-01 | Similar to Major facilitator superfamily antiporter.      |
| 106 | Os04t0628100-01 | 8   | 58   | 2.86 | up | 4.40E-01 | Similar to Polyubiquitin.                                 |
| 107 | Os09t0490200-01 | 10  | 72   | 2.85 | up | 2.94E-01 | Similar to Ethylene signal transcription factor.          |
| 108 | Os01t0773100-02 | 8   | 57   | 2.83 | up | 4.66E-01 | Similar to F20D22.3 protein.                              |
| 109 | Os10t0561900-03 | 116 | 825  | 2.83 | up | 1.33E-04 | Similar to Protein-tyrosine phosphatase mitochondrial 1.  |
| 110 | Os02t0644000-01 | 9   | 64   | 2.83 | up | 3.85E-01 | Similar to C13 endopeptidase NP1 (Fragment).              |
| 111 | Os08t0503600-01 | 12  | 83   | 2.79 | up | 2.32E-01 | Hypothetical protein.                                     |
| 112 | Os04t0614600-02 | 11  | 76   | 2.79 | up | 2.86E-01 | Similar to OSIGBa0126B18.7 protein.                       |
| 113 | Os06t0131001-00 | 24  | 165  | 2.78 | up | 3.60E-02 | Conserved hypothetical protein.                           |
| 114 | Os02t0435000-02 | 8   | 54   | 2.75 | up | 5.72E-01 | Translocation protein Sec62 family protein.               |
| 115 | Os08t0484500-02 | 21  | 139  | 2.73 | up | 7.26E-02 | Similar to Phospho-2-dehydro-3-deoxyheptonate aldolase 2. |
| 116 | Os08t0102700-05 | 10  | 65   | 2.70 | up | 4.34E-01 | Harpin-induced 1 domain containing protein.               |
| 117 | Os02t0832600-01 | 24  | 154  | 2.68 | up | 6.14E-02 | Similar to PRLI-interacting factor A (Fragment).          |
| 118 | Os04t0652700-02 | 17  | 109  | 2.68 | up | 1.52E-01 | Similar to nuclease PA3.                                  |
| 119 | Os09t0508401-00 | 9   | 56   | 2.64 | up | 6.12E-01 | Non-protein coding transcript.                            |
| 120 | Os01t0872700-01 | 11  | 68   | 2.63 | up | 4.42E-01 | Zinc finger, CCHC-type domain containing protein.         |
| 121 | Os09t0565700-01 | 11  | 68   | 2.63 | up | 4.42E-01 | Prephenate dehydratase domain containing protein.         |
| 122 | Os05t0481500-01 | 12  | 74   | 2.62 | up | 3.88E-01 | K Homology domain containing protein.                     |
| 123 | Os02t0789400-01 | 14  | 86   | 2.62 | up | 2.92E-01 | Similar to 9G8-like SR protein (RSZp22 splicing factor).  |
| 124 | Os02t0585650-01 | 484 | 2885 | 2.58 | up | 2.33E-04 | Hypothetical gene.                                        |
| 125 | Os01t0172400-03 | 132 | 782  | 2.57 | up | 9.28E-04 | Phospholipase D alpha 1 precursor (EC 3.1.4.4)            |
| 126 | Os02t0779200-02 | 88  | 518  | 2.56 | up | 2.40E-03 | Similar to Subtilisin protease (Fragment).                |
| 127 | Os02t0783650-01 | 18  | 104  | 2.53 | up | 2.29E-01 | Hypothetical gene.                                        |
| 128 | Os12t0503000-05 | 14  | 79   | 2.50 | up | 4.14E-01 | Similar to Allantoin permease.                            |

|     |                 |     |      |      |    |          |                                                                                                 |
|-----|-----------------|-----|------|------|----|----------|-------------------------------------------------------------------------------------------------|
| 129 | Os04t0479100-02 | 16  | 90   | 2.49 | up | 3.31E-01 | Similar to OSIGBa0116M22.10 protein.                                                            |
| 130 | Os03t0656850-00 | 21  | 117  | 2.48 | up | 2.00E-01 | Conserved hypothetical protein.                                                                 |
| 131 | Os08t0485600-01 | 11  | 60   | 2.45 | up | 6.70E-01 | Methyl-CpG DNA binding domain containing protein.                                               |
| 132 | Os03t0432100-01 | 19  | 103  | 2.44 | up | 2.80E-01 | Similar to Pyruvate, phosphate dikinase 2.                                                      |
| 133 | Os09t0557900-01 | 26  | 140  | 2.43 | up | 1.51E-01 | Similar to Protein phosphatase 2C gamma isoform (EC 3.1.3.16)                                   |
| 134 | Os08t0425500-01 | 33  | 177  | 2.42 | up | 8.78E-02 | Endonuclease/exonuclease/phosphatase domain containing protein.                                 |
| 135 | Os03t0187350-01 | 12  | 64   | 2.42 | up | 6.49E-01 | Conserved hypothetical protein.                                                                 |
| 136 | Os08t0189850-01 | 12  | 64   | 2.42 | up | 6.49E-01 | Germin-like protein 8-9, Disease resistance                                                     |
| 137 | Os04t0516600-01 | 69  | 366  | 2.41 | up | 1.35E-02 | Pyridoxal phosphate-dependent transferase, major region, subdomain 1 domain containing protein. |
| 138 | Os03t0159900-02 | 10  | 52   | 2.38 | up | 8.70E-01 | Hypothetical conserved gene.                                                                    |
| 139 | Os04t0173300-02 | 48  | 249  | 2.38 | up | 4.35E-02 | Similar to Transmembrane protein 115.                                                           |
| 140 | Os05t0405000-02 | 499 | 2568 | 2.36 | up | 1.15E-03 | Similar to Isoform 2 of Pyruvate, phosphate dikinase 1, chloroplastic.                          |
| 141 | Os02t0784801-00 | 10  | 51   | 2.35 | up | 9.09E-01 | Non-protein coding transcript.                                                                  |
| 142 | Os02t0473200-02 | 16  | 81   | 2.34 | up | 5.06E-01 | Similar to OSIGBa0137O04.7 protein.                                                             |
| 143 | Os10t0341700-02 | 23  | 116  | 2.33 | up | 2.75E-01 | Cellulose synthase-like H1.                                                                     |
| 144 | Os02t0245000-02 | 59  | 296  | 2.33 | up | 3.26E-02 | Similar to predicted protein.                                                                   |
| 145 | Os04t0306800-01 | 13  | 65   | 2.32 | up | 7.05E-01 | RNA recognition motif, RNP-1 domain containing protein.                                         |
| 146 | Os04t0390000-01 | 27  | 135  | 2.32 | up | 2.09E-01 | Similar to OSIGBa0096P03.7 protein.                                                             |
| 147 | Os04t0636900-01 | 12  | 60   | 2.32 | up | 7.76E-01 | RNA-binding region RNP-1 (RNA recognition motif) domain containing protein.                     |
| 148 | Os03t0794900-02 | 50  | 246  | 2.30 | up | 6.01E-02 | Similar to Proline-rich protein (Fragment).                                                     |
| 149 | Os09t0352400-02 | 15  | 73   | 2.28 | up | 6.37E-01 | Similar to predicted protein.                                                                   |
| 150 | Os03t0233000-01 | 511 | 2485 | 2.28 | up | 2.04E-03 | Protein of unknown function DUF607 family protein.                                              |
| 151 | Os07t0665100-01 | 34  | 165  | 2.28 | up | 1.55E-01 | Hypothetical protein.                                                                           |
| 152 | Os06t0651600-02 | 11  | 53   | 2.27 | up | 9.35E-01 | Similar to protein phosphatase type-2C.                                                         |
| 153 | Os02t0730000-02 | 345 | 1662 | 2.27 | up | 2.53E-03 | Mitochondrial aldehyde dehydrogenase ALDH2a.                                                    |
| 154 | Os01t0622700-01 | 23  | 109  | 2.24 | up | 3.70E-01 | Similar to Protein ABIL1.                                                                       |
| 155 | Os11t0216900-01 | 22  | 102  | 2.21 | up | 4.24E-01 | Similar to IDI2.                                                                                |
| 156 | Os10t0548200-03 | 16  | 74   | 2.21 | up | 6.79E-01 | Hypothetical conserved gene.                                                                    |

|     |                 |     |      |      |    |          |                                                                                   |
|-----|-----------------|-----|------|------|----|----------|-----------------------------------------------------------------------------------|
| 157 | Os02t0796500-02 | 38  | 174  | 2.20 | up | 1.75E-01 | B-type response regulator, Cytokinin signaling                                    |
| 158 | Os01t0748900-02 | 26  | 119  | 2.19 | up | 3.47E-01 | Membrane attack complex component/perforin/complement C9 family protein.          |
| 159 | Os06t0704600-01 | 39  | 178  | 2.19 | up | 1.70E-01 | Similar to Delta-aminolevulinic acid dehydratase (Fragment).                      |
| 160 | Os02t0274900-03 | 13  | 59   | 2.18 | up | 9.09E-01 | Similar to metabolite transport protein csbC.                                     |
| 161 | Os01t0871200-01 | 113 | 510  | 2.17 | up | 1.96E-02 | Zinc finger, C2H2-type domain containing protein.                                 |
| 162 | Os01t0831300-01 | 14  | 63   | 2.17 | up | 8.64E-01 | Similar to Ammonium transporter.                                                  |
| 163 | Os11t0307550-00 | 18  | 81   | 2.17 | up | 6.48E-01 | Conserved hypothetical protein.                                                   |
| 164 | Os11t0456300-02 | 14  | 63   | 2.17 | up | 8.64E-01 | Similar to SKP1-like protein 1A.                                                  |
| 165 | Os06t0132100-03 | 120 | 537  | 2.16 | up | 1.92E-02 | Transmembrane receptor, eukaryota domain containing protein.                      |
| 166 | Os06t0724100-01 | 44  | 195  | 2.15 | up | 1.59E-01 | Zinc finger, RING/FYVE/PHD-type domain containing protein.                        |
| 167 | Os04t0670200-02 | 566 | 2504 | 2.15 | up | 5.30E-03 | Granulin domain containing protein.                                               |
| 168 | Os03t0198300-02 | 23  | 101  | 2.13 | up | 5.03E-01 | Heat shock protein DnaJ, N-terminal domain containing protein.                    |
| 169 | Os12t0605800-01 | 61  | 267  | 2.13 | up | 8.84E-02 | Similar to 3-methylcrotonyl CoA carboxylase biotin-containing subunit (Fragment). |
| 170 | Os03t0826900-01 | 534 | 2307 | 2.11 | up | 6.59E-03 | Conserved hypothetical protein.                                                   |
| 171 | Os03t0636600-01 | 16  | 69   | 2.11 | up | 8.36E-01 | Hypothetical conserved gene.                                                      |
| 172 | Os08t0221300-00 | 20  | 86   | 2.10 | up | 6.59E-01 | Conserved hypothetical protein.                                                   |
| 173 | Os01t0283300-01 | 17  | 73   | 2.10 | up | 7.98E-01 | Conserved hypothetical protein.                                                   |
| 174 | Os01t0655400-01 | 17  | 73   | 2.10 | up | 7.98E-01 | Conserved hypothetical protein.                                                   |
| 175 | Os01t0172400-01 | 46  | 196  | 2.09 | up | 1.82E-01 | Similar to Phospholipase D alpha 1.                                               |
| 176 | Os02t0783625-00 | 84  | 356  | 2.08 | up | 6.04E-02 | Similar to Lysine ketoglutarate reductase/saccharopine dehydrogenase.             |
| 177 | Os01t0259200-01 | 17  | 72   | 2.08 | up | 8.25E-01 | Similar to serine/threonine protein kinase PBS1.                                  |
| 178 | Os04t0481100-01 | 17  | 72   | 2.08 | up | 8.25E-01 | Similar to H0510A06.3 protein.                                                    |
| 179 | Os07t0570500-01 | 13  | 55   | 2.08 | up | 1.00E+00 | Similar to predicted protein.                                                     |
| 180 | Os02t0297600-02 | 53  | 222  | 2.07 | up | 1.58E-01 | Protein of unknown function DUF707 family protein.                                |
| 181 | Os06t0103300-02 | 78  | 326  | 2.06 | up | 7.61E-02 | Similar to Homogentisate 1,2-dioxygenase.                                         |
| 182 | Os10t0160100-02 | 24  | 100  | 2.06 | up | 5.79E-01 | Glycoside hydrolase, family 17 protein.                                           |
| 183 | Os11t0701700-02 | 30  | 125  | 2.06 | up | 4.14E-01 | Hypothetical gene.                                                                |
| 184 | Os04t0275950-01 | 19  | 79   | 2.06 | up | 7.63E-01 | Conserved hypothetical protein.                                                   |

|     |                 |     |      |      |    |          |                                                                                                 |
|-----|-----------------|-----|------|------|----|----------|-------------------------------------------------------------------------------------------------|
| 185 | Os06t0182500-01 | 15  | 62   | 2.05 | up | 9.87E-01 | Zinc finger, LIM-type domain containing protein.                                                |
| 186 | Os11t0704600-02 | 23  | 95   | 2.05 | up | 6.30E-01 | Similar to Beta-1,3 glucanase precursor (EC 3.2.1.39).                                          |
| 187 | Os01t0265800-02 | 92  | 378  | 2.04 | up | 6.46E-02 | RNA-binding region RNP-1 (RNA recognition motif) domain containing protein.                     |
| 188 | Os04t0688300-01 | 415 | 1705 | 2.04 | up | 1.15E-02 | Haem peroxidase, plant/fungal/bacterial family protein.                                         |
| 189 | Os03t0429800-01 | 19  | 78   | 2.04 | up | 8.04E-01 | Similar to Xanthine dehydrogenase 1 (EC 1.1.1.204).                                             |
| 190 | Os02t0794700-02 | 31  | 127  | 2.03 | up | 4.25E-01 | Similar to Leucine aminopeptidase (Cytosol aminopeptidase) (Fragment).                          |
| 191 | Os04t0468600-06 | 23  | 94   | 2.03 | up | 6.56E-01 | Similar to cDNA clone:006-303-A07, full insert sequence.                                        |
| 192 | Os08t0152400-00 | 78  | 317  | 2.02 | up | 9.45E-02 | Similar to P450.                                                                                |
| 193 | Os01t0209000-02 | 16  | 65   | 2.02 | up | 9.65E-01 | Alg9-like mannosyltransferase family protein.                                                   |
| 194 | Os08t0465800-02 | 32  | 130  | 2.02 | up | 4.21E-01 | Similar to Glutamate decarboxylase.                                                             |
| 195 | Os06t0194900-02 | 947 | 3834 | 2.02 | up | 1.39E-02 | Sucrose synthase 2 (EC 2.4.1.13).                                                               |
| 196 | Os05t0438600-01 | 255 | 1031 | 2.02 | up | 1.86E-02 | Fructose-1,6-bisphosphatase class 1/Sedoheptulose-1,7-bisphosphatase domain containing protein. |
| 197 | Os01t0760600-03 | 160 | 640  | 2.00 | up | 3.36E-02 | Aspartate aminotransferase, cytoplasmic (EC 2.6.1.1) (Transaminase A).                          |
| 198 | Os03t0644400-01 | 27  | 108  | 2.00 | up | 5.78E-01 | Amino acid permease.                                                                            |
| 199 | Os07t0664600-01 | 42  | 167  | 1.99 | up | 3.14E-01 | Glucose/ribitol dehydrogenase family protein.                                                   |
| 200 | Os04t0439100-02 | 67  | 266  | 1.99 | up | 1.43E-01 | T-complex 11 family protein.                                                                    |

This calculation is based on the expressed tag frequency;

The mean of FPKM values are more than 10;

Inf and -Inf indicate positive infinity and negative infinity, respectively;

R, regulation.

**ESI Table S6.** Top 200 annotated genes most down-regulation in shoots and roots in the presence of IPU and absence of IPU. This calculation is based on the expressed tag frequency. The mean of FPKM values are more than 10. Inf and -Inf indicate positive infinity and negative infinity, respectively. R, regulation.

| Rank overall | Gene ID         | Shoot   |      |                        |      |          | Annotation                                                                                |
|--------------|-----------------|---------|------|------------------------|------|----------|-------------------------------------------------------------------------------------------|
|              |                 | FPKM    |      | Log <sub>2</sub> Ratio | R    | FDR      |                                                                                           |
|              |                 | Control | IPU  |                        |      |          |                                                                                           |
| 1            | Os01t0121800-02 | 31.70   | 0.00 | -Inf                   | down | 7.59E-03 | Similar to xylosyltransferase 1.                                                          |
| 2            | Os01t0206700-02 | 106.00  | 0.00 | -Inf                   | down | 4.36E-06 | Similar to cDNA clone:J013031K24, full insert sequence.                                   |
| 3            | Os01t0229200-04 | 50.10   | 0.00 | -Inf                   | down | 8.94E-04 | Hypothetical conserved gene.                                                              |
| 4            | Os01t0236700-02 | 95.90   | 0.00 | -Inf                   | down | 9.97E-06 | Hypothetical conserved gene.                                                              |
| 5            | Os01t0290000-02 | 283.00  | 0.00 | -Inf                   | down | 9.01E-11 | Similar to Cyprosin precursor (EC 3.4.23.-) (Fragment).                                   |
| 6            | Os01t0290000-03 | 159.00  | 0.00 | -Inf                   | down | 8.17E-08 | Similar to Cyprosin precursor (EC 3.4.23.-) (Fragment).                                   |
| 7            | Os01t0579600-03 | 46.60   | 0.00 | -Inf                   | down | 1.32E-03 | Similar to Calcineurin B-like protein 9.                                                  |
| 8            | Os01t0580100-02 | 27.30   | 0.00 | -Inf                   | down | 1.30E-02 | Similar to Dolichyl-phosphate-mannose--glycolipid alpha-mannosyltransferase-like protein. |
| 9            | Os01t0617900-03 | 605.00  | 0.00 | -Inf                   | down | 3.75E-15 | Similar to oxygen-evolving complex-related.                                               |
| 10           | Os01t0686800-01 | 51.90   | 0.00 | -Inf                   | down | 7.37E-04 | Protein containing the WD-40 repeat, Innate immunity                                      |
| 11           | Os01t0698300-02 | 30.80   | 0.00 | -Inf                   | down | 8.45E-03 | Similar to transposon protein.                                                            |
| 12           | Os01t0707500-02 | 93.30   | 0.00 | -Inf                   | down | 1.26E-05 | Similar to Transcription factor LAX PANICLE.                                              |
| 13           | Os01t0718300-03 | 32.50   | 0.00 | -Inf                   | down | 6.82E-03 | Similar to Brassinosteroid-insensitive 1.                                                 |
| 14           | Os01t0723800-02 | 121.00  | 0.00 | -Inf                   | down | 1.22E-06 | Hypothetical conserved gene.                                                              |
| 15           | Os01t0736900-02 | 483.00  | 0.00 | -Inf                   | down | 7.14E-14 | Similar to seed maturation protein.                                                       |
| 16           | Os01t0750300-03 | 56.30   | 0.00 | -Inf                   | down | 4.59E-04 | Similar to cDNA clone:J023093O20, full insert sequence.                                   |
| 17           | Os01t0752800-02 | 72.10   | 0.00 | -Inf                   | down | 9.06E-05 | Non-protein coding transcript.                                                            |
| 18           | Os01t0772600-03 | 67.70   | 0.00 | -Inf                   | down | 1.40E-04 | Similar to ATP binding protein.                                                           |
| 19           | Os01t0781700-00 | 26.40   | 0.00 | -Inf                   | down | 1.45E-02 | Similar to Blast resistance protein Pi37.                                                 |

|    |                 |        |      |      |      |          |                                                                   |
|----|-----------------|--------|------|------|------|----------|-------------------------------------------------------------------|
| 20 | Os01t0871800-01 | 22.00  | 0.00 | -Inf | down | 2.55E-02 | TGF-beta receptor, type I/II extracellular region family protein. |
| 21 | Os01t0872100-01 | 78.30  | 0.00 | -Inf | down | 4.99E-05 | TGF-beta receptor, type I/II extracellular region family protein. |
| 22 | Os01t0919600-02 | 442.00 | 0.00 | -Inf | down | 2.38E-13 | Similar to predicted protein.                                     |
| 23 | Os01t0934500-01 | 20.20  | 0.00 | -Inf | down | 3.21E-02 | Hypothetical protein.                                             |
| 24 | Os01t0945300-02 | 42.20  | 0.00 | -Inf | down | 2.18E-03 | Amino acid/polyamine transporter I family protein.                |
| 25 | Os01t0960400-02 | 36.90  | 0.00 | -Inf | down | 4.03E-03 | Similar to predicted protein.                                     |
| 26 | Os01t0967800-02 | 87.10  | 0.00 | -Inf | down | 2.19E-05 | Hypothetical conserved gene.                                      |
| 27 | Os02t0115600-02 | 47.50  | 0.00 | -Inf | down | 1.20E-03 | Nucleic acid-binding, OB-fold-like domain containing protein.     |
| 28 | Os02t0120800-02 | 38.70  | 0.00 | -Inf | down | 3.27E-03 | Similar to Small GTP-binding protein (Fragment).                  |
| 29 | Os02t0194700-02 | 430.00 | 0.00 | -Inf | down | 3.39E-13 | Similar to Lipoxygenase.                                          |
| 30 | Os02t0218200-02 | 52.80  | 0.00 | -Inf | down | 6.70E-04 | Similar to APM1 (AMINOPEPTIDASE M1).                              |
| 31 | Os02t0255000-03 | 71.30  | 0.00 | -Inf | down | 9.89E-05 | Similar to Cyclic nucleotide-gated ion channel 1.                 |
| 32 | Os02t0288200-02 | 62.50  | 0.00 | -Inf | down | 2.41E-04 | Hypothetical conserved gene.                                      |
| 33 | Os02t0294100-02 | 21.10  | 0.00 | -Inf | down | 2.86E-02 | Cyclin-like F-box domain containing protein.                      |
| 34 | Os02t0501350-01 | 20.20  | 0.00 | -Inf | down | 3.21E-02 | Conserved hypothetical protein.                                   |
| 35 | Os02t0519300-02 | 20.20  | 0.00 | -Inf | down | 3.21E-02 | Similar to H0112G12.10 protein.                                   |
| 36 | Os02t0525900-03 | 74.80  | 0.00 | -Inf | down | 7.00E-05 | Similar to H0502B11.5 protein.                                    |
| 37 | Os02t0613900-02 | 21.10  | 0.00 | -Inf | down | 2.86E-02 | Similar to adenine phosphoribosyltransferase 2.                   |
| 38 | Os02t0614600-02 | 104.00 | 0.00 | -Inf | down | 5.05E-06 | Hypothetical conserved gene.                                      |
| 39 | Os02t0615800-02 | 109.00 | 0.00 | -Inf | down | 3.25E-06 | Hypothetical conserved gene.                                      |
| 40 | Os02t0623500-02 | 41.30  | 0.00 | -Inf | down | 2.41E-03 | Similar to Lysyl-tRNA synthetase.                                 |
| 41 | Os02t0657850-00 | 36.90  | 0.00 | -Inf | down | 4.03E-03 | Conserved hypothetical protein.                                   |
| 42 | Os02t0674233-00 | 85.30  | 0.00 | -Inf | down | 2.58E-05 | Hypothetical conserved gene.                                      |
| 43 | Os02t0696650-00 | 20.20  | 0.00 | -Inf | down | 3.21E-02 | Hypothetical gene.                                                |
| 44 | Os02t0714000-03 | 24.60  | 0.00 | -Inf | down | 1.81E-02 | Hypothetical gene.                                                |
| 45 | Os02t0714600-02 | 173.00 | 0.00 | -Inf | down | 3.29E-08 | Ribose-phosphate pyrophosphokinase 4 (EC 2.7.6.1).                |
| 46 | Os02t0725200-02 | 144.00 | 0.00 | -Inf | down | 2.25E-07 | Similar to Ribulose-1,5-bisphosphate carboxylase.                 |
| 47 | Os02t0745700-02 | 58.10  | 0.00 | -Inf | down | 3.81E-04 | Similar to protein SUR2.                                          |
| 48 | Os02t0752000-02 | 27.30  | 0.00 | -Inf | down | 1.30E-02 | Similar to predicted protein.                                     |
| 49 | Os02t0759800-02 | 145.00 | 0.00 | -Inf | down | 2.12E-07 | Similar to pre-mRNA-splicing factor prp45.                        |



|    |                 |        |      |      |      |          |                                                                                |
|----|-----------------|--------|------|------|------|----------|--------------------------------------------------------------------------------|
| 50 | Os02t0778200-02 | 53.70  | 0.00 | -Inf | down | 6.09E-04 | Similar to predicted protein.                                                  |
| 51 | Os02t0778300-02 | 24.60  | 0.00 | -Inf | down | 1.81E-02 | Similar to predicted protein.                                                  |
| 52 | Os02t0819600-02 | 69.50  | 0.00 | -Inf | down | 1.18E-04 | Serine/threonine protein kinase-related domain containing protein.             |
| 53 | Os02t0823500-00 | 32.50  | 0.00 | -Inf | down | 6.82E-03 | Non-protein coding transcript.                                                 |
| 54 | Os02t0829600-01 | 42.20  | 0.00 | -Inf | down | 2.18E-03 | Zinc finger, RING/FYVE/PHD-type domain containing protein.                     |
| 55 | Os03t0114300-02 | 76.50  | 0.00 | -Inf | down | 5.91E-05 | Similar to ATP binding protein.                                                |
| 56 | Os03t0119500-02 | 34.30  | 0.00 | -Inf | down | 5.52E-03 | Similar to cDNA clone:J023020014, full insert sequence.                        |
| 57 | Os03t0130500-02 | 44.00  | 0.00 | -Inf | down | 1.78E-03 | Similar to ESTs AU031435(E61570).                                              |
| 58 | Os03t0142800-02 | 66.00  | 0.00 | -Inf | down | 1.68E-04 | Hypothetical conserved gene.                                                   |
| 59 | Os03t0143700-02 | 36.90  | 0.00 | -Inf | down | 4.03E-03 | Hypothetical conserved gene.                                                   |
| 60 | Os03t0152800-03 | 23.80  | 0.00 | -Inf | down | 2.03E-02 | Similar to predicted protein.                                                  |
| 61 | Os03t0166800-02 | 174.00 | 0.00 | -Inf | down | 3.12E-08 | Similar to Endonuclease/Exonuclease/phosphatase family protein, expressed.     |
| 62 | Os03t0170200-02 | 38.70  | 0.00 | -Inf | down | 3.27E-03 | Conserved hypothetical protein.                                                |
| 63 | Os03t0174600-02 | 35.20  | 0.00 | -Inf | down | 4.97E-03 | Similar to tRNA methyltransferase.                                             |
| 64 | Os03t0191100-03 | 60.70  | 0.00 | -Inf | down | 2.89E-04 | Mitochondrial carrier protein domain containing protein.                       |
| 65 | Os03t0197125-00 | 25.50  | 0.00 | -Inf | down | 1.62E-02 | Hypothetical gene.                                                             |
| 66 | Os03t0204366-00 | 30.80  | 0.00 | -Inf | down | 8.45E-03 | Conserved hypothetical protein.                                                |
| 67 | Os03t0220300-02 | 58.10  | 0.00 | -Inf | down | 3.81E-04 | Hypothetical conserved gene.                                                   |
| 68 | Os03t0241600-02 | 70.40  | 0.00 | -Inf | down | 1.08E-04 | Serine/threonine protein kinase-related domain containing protein.             |
| 69 | Os03t0253600-01 | 22.90  | 0.00 | -Inf | down | 2.27E-02 | Conserved hypothetical protein.                                                |
| 70 | Os03t0254700-02 | 81.80  | 0.00 | -Inf | down | 3.57E-05 | Similar to predicted protein.                                                  |
| 71 | Os03t0257900-03 | 25.50  | 0.00 | -Inf | down | 1.62E-02 | Similar to Lectin-like receptor kinase 7%3B2.                                  |
| 72 | Os03t0262150-01 | 24.60  | 0.00 | -Inf | down | 1.81E-02 | Hypothetical gene.                                                             |
| 73 | Os03t0266800-02 | 50.10  | 0.00 | -Inf | down | 8.94E-04 | Similar to BRASSINOSTEROID INSENSITIVE 1-associated receptor kinase 1.         |
| 74 | Os03t0271200-02 | 74.80  | 0.00 | -Inf | down | 7.00E-05 | Similar to Protein TOC75, chloroplastic.                                       |
| 75 | Os03t0278000-03 | 45.70  | 0.00 | -Inf | down | 1.46E-03 | Similar to D-TDP-glucose dehydratase.                                          |
| 76 | Os03t0283600-02 | 224.00 | 0.00 | -Inf | down | 1.68E-09 | Similar to CDP-diacylglycerol--glycerol-3-phosphate 3-phosphatidyltransferase. |
| 77 | Os03t0285166-00 | 33.40  | 0.00 | -Inf | down | 6.13E-03 | Non-protein coding transcript.                                                 |
| 78 | Os03t0287600-00 | 22.90  | 0.00 | -Inf | down | 2.27E-02 | Conserved hypothetical protein.                                                |
| 79 | Os03t0289200-02 | 109.00 | 0.00 | -Inf | down | 3.25E-06 | Similar to protein YIP1.                                                       |

|     |                 |        |      |      |      |          |                                                            |
|-----|-----------------|--------|------|------|------|----------|------------------------------------------------------------|
| 80  | Os03t0355600-02 | 88.00  | 0.00 | -Inf | down | 2.02E-05 | Similar to predicted protein.                              |
| 81  | Os03t0363900-02 | 31.70  | 0.00 | -Inf | down | 7.59E-03 | Zinc finger, DHHC-type domain containing protein.          |
| 82  | Os03t0375300-02 | 28.20  | 0.00 | -Inf | down | 1.17E-02 | Similar to cationic amino acid transporter.                |
| 83  | Os03t0401300-03 | 86.20  | 0.00 | -Inf | down | 2.38E-05 | Similar to Sucrose synthase metabolism (Fragment).         |
| 84  | Os03t0429800-04 | 75.70  | 0.00 | -Inf | down | 6.43E-05 | Similar to Aldehyde oxidase and xanthine dehydrogenase.    |
| 85  | Os03t0582000-01 | 66.00  | 0.00 | -Inf | down | 1.68E-04 | Similar to Glutamate formiminotransferase.                 |
| 86  | Os03t0640800-03 | 22.00  | 0.00 | -Inf | down | 2.55E-02 | Similar to cDNA clone:J033124M18, full insert sequence.    |
| 87  | Os03t0686201-01 | 21.10  | 0.00 | -Inf | down | 2.86E-02 | Hypothetical gene.                                         |
| 88  | Os03t0711400-02 | 88.00  | 0.00 | -Inf | down | 2.02E-05 | Similar to cDNA clone:J023075G08, full insert sequence.    |
| 89  | Os03t0800000-01 | 29.90  | 0.00 | -Inf | down | 9.41E-03 | Similar to Nitrate and chloride transporter.               |
| 90  | Os03t0802300-03 | 34.30  | 0.00 | -Inf | down | 5.52E-03 | Hypothetical conserved gene.                               |
| 91  | Os03t0806700-02 | 84.50  | 0.00 | -Inf | down | 2.79E-05 | Protein of unknown function DUF868, plant family protein.  |
| 92  | Os03t0810600-02 | 29.00  | 0.00 | -Inf | down | 1.05E-02 | Similar to ATP/GTP/Ca <sup>++</sup> binding protein.       |
| 93  | Os03t0821900-02 | 74.80  | 0.00 | -Inf | down | 7.00E-05 | Similar to Protein kinase APK1B.                           |
| 94  | Os03t0832800-01 | 26.40  | 0.00 | -Inf | down | 1.45E-02 | Similar to glycerol-3-phosphate acyltransferase 1.         |
| 95  | Os03t0832800-03 | 49.30  | 0.00 | -Inf | down | 9.85E-04 | Similar to glycerol-3-phosphate acyltransferase 1.         |
| 96  | Os03t0856400-02 | 110.00 | 0.00 | -Inf | down | 3.03E-06 | Similar to Protein kinase AKINbetagamma-2.                 |
| 97  | Os04t0118400-03 | 53.70  | 0.00 | -Inf | down | 6.09E-04 | Similar to H0613H07.5 protein.                             |
| 98  | Os04t0390000-04 | 311.00 | 0.00 | -Inf | down | 2.71E-11 | Similar to OSIGBa0096P03.7 protein.                        |
| 99  | Os04t0422000-02 | 280.00 | 0.00 | -Inf | down | 1.06E-10 | PAP fibrillin family protein.                              |
| 100 | Os04t0442300-02 | 133.00 | 0.00 | -Inf | down | 5.12E-07 | A-type response regulator, Cytokinin signaling             |
| 101 | Os04t0448800-02 | 20.20  | 0.00 | -Inf | down | 3.21E-02 | Similar to Mitochondrial phosphate transporter (Fragment). |
| 102 | Os04t0459500-01 | 22.00  | 0.00 | -Inf | down | 2.55E-02 | Similar to H0219H12.1 protein.                             |
| 103 | Os04t0462900-06 | 52.80  | 0.00 | -Inf | down | 6.70E-04 | Similar to prohibitin2.                                    |
| 104 | Os04t0477025-00 | 22.00  | 0.00 | -Inf | down | 2.55E-02 | Hypothetical gene.                                         |
| 105 | Os04t0485700-01 | 39.60  | 0.00 | -Inf | down | 2.95E-03 | Similar to Exonuclease.                                    |
| 106 | Os04t0488600-03 | 73.90  | 0.00 | -Inf | down | 7.63E-05 | Similar to predicted protein.                              |
| 107 | Os04t0605300-02 | 102.00 | 0.00 | -Inf | down | 5.86E-06 | Leucine-rich repeat, typical subtype containing protein.   |
| 108 | Os04t0613800-03 | 45.70  | 0.00 | -Inf | down | 1.46E-03 | Hypothetical conserved gene.                               |
| 109 | Os04t0640700-02 | 44.00  | 0.00 | -Inf | down | 1.78E-03 | Similar to OSIGBa0138H21-OSIGBa0138E01.14 protein.         |

|     |                 |        |      |      |      |          |                                                                  |
|-----|-----------------|--------|------|------|------|----------|------------------------------------------------------------------|
| 110 | Os04t0641000-02 | 22.00  | 0.00 | -Inf | down | 2.55E-02 | Similar to DNA-directed RNA polymerase.                          |
| 111 | Os04t0650000-03 | 39.60  | 0.00 | -Inf | down | 2.95E-03 | Similar to cDNA clone:J013002H09, full insert sequence.          |
| 112 | Os04t0682800-02 | 53.70  | 0.00 | -Inf | down | 6.09E-04 | Similar to H0124B04.17 protein.                                  |
| 113 | Os04t0684000-01 | 26.40  | 0.00 | -Inf | down | 1.45E-02 | Hypothetical protein.                                            |
| 114 | Os05t0143500-03 | 32.50  | 0.00 | -Inf | down | 6.82E-03 | Similar to Kinase (Fragment).                                    |
| 115 | Os05t0147400-02 | 22.00  | 0.00 | -Inf | down | 2.55E-02 | Similar to T-complex protein 1 subunit zeta.                     |
| 116 | Os05t0150900-03 | 22.90  | 0.00 | -Inf | down | 2.27E-02 | Similar to Histidyl-tRNA synthetase (Fragment).                  |
| 117 | Os05t0179800-02 | 36.90  | 0.00 | -Inf | down | 4.03E-03 | Similar to early fruit mRNA.                                     |
| 118 | Os05t0230600-02 | 42.20  | 0.00 | -Inf | down | 2.18E-03 | Similar to predicted protein.                                    |
| 119 | Os05t0285900-02 | 20.20  | 0.00 | -Inf | down | 3.21E-02 | Conserved hypothetical protein.                                  |
| 120 | Os05t0289400-02 | 46.60  | 0.00 | -Inf | down | 1.32E-03 | Hypothetical conserved gene.                                     |
| 121 | Os05t0349700-03 | 47.50  | 0.00 | -Inf | down | 1.20E-03 | Similar to Chlorophyll synthase.                                 |
| 122 | Os05t0393400-01 | 27.30  | 0.00 | -Inf | down | 1.30E-02 | Similar to PAC (Fragment).                                       |
| 123 | Os05t0405900-03 | 21.10  | 0.00 | -Inf | down | 2.86E-02 | Conserved hypothetical protein.                                  |
| 124 | Os05t0468750-00 | 44.00  | 0.00 | -Inf | down | 1.78E-03 | Hypothetical gene.                                               |
| 125 | Os05t0474600-02 | 36.10  | 0.00 | -Inf | down | 4.47E-03 | Similar to predicted protein.                                    |
| 126 | Os05t0499800-01 | 28.20  | 0.00 | -Inf | down | 1.17E-02 | UDP-glucuronosyl/UDP-glucosyltransferase family protein.         |
| 127 | Os05t0515400-02 | 55.40  | 0.00 | -Inf | down | 5.04E-04 | Similar to Auxin response factor 14.                             |
| 128 | Os05t0519400-02 | 52.80  | 0.00 | -Inf | down | 6.70E-04 | Similar to predicted protein.                                    |
| 129 | Os05t0545000-02 | 190.00 | 0.00 | -Inf | down | 1.18E-08 | Similar to Phosphatidylinositol transfer-like protein III.       |
| 130 | Os05t0559900-02 | 33.40  | 0.00 | -Inf | down | 6.13E-03 | Similar to SKIP interacting protein 25.                          |
| 131 | Os05t0571000-02 | 144.00 | 0.00 | -Inf | down | 2.25E-07 | Similar to SPA1 signal transducer.                               |
| 132 | Os05t0591900-02 | 132.00 | 0.00 | -Inf | down | 5.46E-07 | Non-protein coding transcript.                                   |
| 133 | Os06t0113900-06 | 66.90  | 0.00 | -Inf | down | 1.53E-04 | Hypothetical conserved gene.                                     |
| 134 | Os06t0136600-02 | 42.20  | 0.00 | -Inf | down | 2.18E-03 | Similar to Enolase.                                              |
| 135 | Os06t0227200-03 | 193.00 | 0.00 | -Inf | down | 1.01E-08 | Hypothetical conserved gene.                                     |
| 136 | Os06t0258900-02 | 29.90  | 0.00 | -Inf | down | 9.41E-03 | Similar to predicted protein.                                    |
| 137 | Os06t0275800-03 | 150.00 | 0.00 | -Inf | down | 1.47E-07 | Amino acid transporter, transmembrane domain containing protein. |
| 138 | Os06t0474800-01 | 65.10  | 0.00 | -Inf | down | 1.83E-04 | Similar to 3Fe-4S ferredoxin.                                    |
| 139 | Os06t0498500-02 | 29.90  | 0.00 | -Inf | down | 9.41E-03 | CCAAT-binding factor domain containing protein.                  |

|     |                 |        |      |      |      |          |                                                                                             |
|-----|-----------------|--------|------|------|------|----------|---------------------------------------------------------------------------------------------|
| 140 | Os06t0559500-03 | 119.00 | 0.00 | -Inf | down | 1.49E-06 | Similar to Acid phosphatase (EC 3.1.3.2) 1 allozyme 1.                                      |
| 141 | Os06t0563300-01 | 106.00 | 0.00 | -Inf | down | 4.05E-06 | Similar to Serine/threonine protein phosphatase 2A 55 kDa regulatory subunit Bbeta isoform. |
| 142 | Os06t0573600-03 | 237.00 | 0.00 | -Inf | down | 8.75E-10 | Similar to Beta-galactosidase.                                                              |
| 143 | Os06t0652000-02 | 33.40  | 0.00 | -Inf | down | 6.13E-03 | Similar to DNA-directed RNA polymerase.                                                     |
| 144 | Os06t0664200-02 | 50.10  | 0.00 | -Inf | down | 8.94E-04 | Hypothetical gene.                                                                          |
| 145 | Os06t0704400-03 | 55.40  | 0.00 | -Inf | down | 5.04E-04 | Similar to cDNA clone:001-132-E04, full insert sequence.                                    |
| 146 | Os06t0707400-02 | 39.60  | 0.00 | -Inf | down | 2.95E-03 | Similar to NBS-LRR disease resistance protein homologue.                                    |
| 147 | Os06t0716700-03 | 118.00 | 0.00 | -Inf | down | 1.60E-06 | Similar to Heat shock protein 90.                                                           |
| 148 | Os06t0730900-02 | 31.70  | 0.00 | -Inf | down | 7.59E-03 | Peptidase A22B, signal peptide peptidase domain containing protein.                         |
| 149 | Os07t0134000-04 | 56.30  | 0.00 | -Inf | down | 4.59E-04 | Similar to Amino acid permease 6.                                                           |
| 150 | Os07t0161000-02 | 30.80  | 0.00 | -Inf | down | 8.45E-03 | Hypothetical conserved gene.                                                                |
| 151 | Os07t0190900-02 | 32.50  | 0.00 | -Inf | down | 6.82E-03 | Hypothetical conserved gene.                                                                |
| 152 | Os07t0220600-01 | 34.30  | 0.00 | -Inf | down | 5.52E-03 | Hypothetical conserved gene.                                                                |
| 153 | Os07t0270900-02 | 36.90  | 0.00 | -Inf | down | 4.03E-03 | Mak16 protein family protein.                                                               |
| 154 | Os07t0295400-02 | 28.20  | 0.00 | -Inf | down | 1.17E-02 | Conserved hypothetical protein.                                                             |
| 155 | Os07t0445600-02 | 22.00  | 0.00 | -Inf | down | 2.55E-02 | Conserved hypothetical protein.                                                             |
| 156 | Os07t0452700-02 | 51.00  | 0.00 | -Inf | down | 8.11E-04 | Conserved hypothetical protein.                                                             |
| 157 | Os07t0481000-02 | 73.90  | 0.00 | -Inf | down | 7.63E-05 | Similar to MYND finger family protein.                                                      |
| 158 | Os07t0516500-04 | 123.00 | 0.00 | -Inf | down | 1.06E-06 | Hypothetical conserved gene.                                                                |
| 159 | Os07t0533900-00 | 24.60  | 0.00 | -Inf | down | 1.81E-02 | Conserved hypothetical protein.                                                             |
| 160 | Os07t0541200-00 | 20.20  | 0.00 | -Inf | down | 3.21E-02 | Similar to receptor-like serine-threonine protein kinase.                                   |
| 161 | Os07t0567050-00 | 20.20  | 0.00 | -Inf | down | 3.21E-02 | Non-protein coding transcript.                                                              |
| 162 | Os07t0592200-03 | 28.20  | 0.00 | -Inf | down | 1.17E-02 | Similar to predicted protein.                                                               |
| 163 | Os07t0683900-02 | 169.00 | 0.00 | -Inf | down | 4.36E-08 | Similar to Osr40g2 protein (Fragment).                                                      |
| 164 | Os08t0111200-02 | 20.20  | 0.00 | -Inf | down | 3.21E-02 | Similar to predicted protein.                                                               |
| 165 | Os08t0130500-02 | 89.70  | 0.00 | -Inf | down | 1.72E-05 | Similar to 60S acidic ribosomal protein p0.                                                 |
| 166 | Os08t0192300-00 | 20.20  | 0.00 | -Inf | down | 3.21E-02 | Conserved hypothetical protein.                                                             |
| 167 | Os08t0263300-01 | 37.80  | 0.00 | -Inf | down | 3.63E-03 | Similar to cDNA clone:J013108L16, full insert sequence.                                     |
| 168 | Os08t0344600-02 | 149.00 | 0.00 | -Inf | down | 1.66E-07 | Similar to Phosphoenolpyruvate/phosphate translocator.                                      |
| 169 | Os08t0377400-02 | 36.10  | 0.00 | -Inf | down | 4.47E-03 | Exonuclease domain containing protein.                                                      |

|     |                 |        |      |      |      |          |                                                                       |
|-----|-----------------|--------|------|------|------|----------|-----------------------------------------------------------------------|
| 170 | Os08t0396700-02 | 22.90  | 0.00 | -Inf | down | 2.27E-02 | NB-ARC domain containing protein.                                     |
| 171 | Os08t0416900-02 | 50.10  | 0.00 | -Inf | down | 8.94E-04 | Similar to dnaJ domain containing protein.                            |
| 172 | Os08t0451201-00 | 93.30  | 0.00 | -Inf | down | 1.26E-05 | Conserved hypothetical protein.                                       |
| 173 | Os08t0451400-03 | 73.90  | 0.00 | -Inf | down | 7.63E-05 | Similar to ARID/BRIGHT DNA-binding domain-containing protein.         |
| 174 | Os08t0526150-00 | 26.40  | 0.00 | -Inf | down | 1.45E-02 | Hypothetical protein.                                                 |
| 175 | Os09t0115400-03 | 121.00 | 0.00 | -Inf | down | 1.30E-06 | Hypothetical conserved gene.                                          |
| 176 | Os09t0115400-04 | 203.00 | 0.00 | -Inf | down | 5.45E-09 | Hypothetical conserved gene.                                          |
| 177 | Os09t0130800-04 | 61.60  | 0.00 | -Inf | down | 2.63E-04 | Similar to predicted protein.                                         |
| 178 | Os09t0284200-02 | 23.80  | 0.00 | -Inf | down | 2.03E-02 | Similar to Serine/threonine protein phosphatase.                      |
| 179 | Os09t0372400-01 | 24.60  | 0.00 | -Inf | down | 1.81E-02 | Similar to cDNA clone:J033042L23, full insert sequence.               |
| 180 | Os09t0408966-00 | 22.00  | 0.00 | -Inf | down | 2.55E-02 | Hypothetical protein.                                                 |
| 181 | Os09t0434900-02 | 55.40  | 0.00 | -Inf | down | 5.04E-04 | Zinc finger, RING-type domain containing protein.                     |
| 182 | Os09t0501650-00 | 41.30  | 0.00 | -Inf | down | 2.41E-03 | Hypothetical protein.                                                 |
| 183 | Os09t0509350-00 | 29.90  | 0.00 | -Inf | down | 9.41E-03 | Hypothetical protein.                                                 |
| 184 | Os09t0530350-00 | 25.50  | 0.00 | -Inf | down | 1.62E-02 | Hypothetical protein.                                                 |
| 185 | Os09t0541050-00 | 95.00  | 0.00 | -Inf | down | 1.08E-05 | Hypothetical protein.                                                 |
| 186 | Os09t0567400-02 | 34.30  | 0.00 | -Inf | down | 5.52E-03 | Similar to Histidine-containing phosphotransfer protein.              |
| 187 | Os10t0109600-02 | 22.00  | 0.00 | -Inf | down | 2.55E-02 | Peroxidase (EC 1.11.1.7).                                             |
| 188 | Os10t0110800-02 | 38.70  | 0.00 | -Inf | down | 3.27E-03 | Similar to cDNA clone:J023063N08, full insert sequence.               |
| 189 | Os10t0130500-01 | 49.30  | 0.00 | -Inf | down | 9.85E-04 | Hypothetical protein.                                                 |
| 190 | Os10t0167700-02 | 35.20  | 0.00 | -Inf | down | 4.97E-03 | Conserved hypothetical protein.                                       |
| 191 | Os10t0180000-02 | 31.70  | 0.00 | -Inf | down | 7.59E-03 | Similar to secondary cell wall-related glycosyltransferase family 47. |
| 192 | Os10t0206800-02 | 98.50  | 0.00 | -Inf | down | 7.93E-06 | Similar to predicted protein.                                         |
| 193 | Os10t0317900-03 | 202.00 | 0.00 | -Inf | down | 5.73E-09 | Non-protein coding transcript.                                        |
| 194 | Os10t0381800-02 | 20.20  | 0.00 | -Inf | down | 3.21E-02 | Zinc finger, SWIM-type domain containing protein.                     |
| 195 | Os10t0397200-02 | 161.00 | 0.00 | -Inf | down | 7.28E-08 | Similar to predicted protein.                                         |
| 196 | Os10t0473400-03 | 196.00 | 0.00 | -Inf | down | 8.19E-09 | Similar to catalytic.                                                 |
| 197 | Os10t0476000-02 | 74.80  | 0.00 | -Inf | down | 7.00E-05 | Similar to Adaptin ear-binding coat-associated protein 2.             |
| 198 | Os10t0480200-03 | 29.90  | 0.00 | -Inf | down | 9.41E-03 | Similar to Homeobox-leucine zipper protein HOX9.                      |
| 199 | Os10t0495300-02 | 190.00 | 0.00 | -Inf | down | 1.18E-08 | Similar to ALG2-interacting protein X.                                |

| 200          | Os10t0502566-00 | 32.50   | 0.00 | -Inf                   | down | 6.82E-03 | Non-protein coding transcript.                                         |
|--------------|-----------------|---------|------|------------------------|------|----------|------------------------------------------------------------------------|
| Rank overall | Gene ID         | Root    |      |                        |      |          | Annoation                                                              |
|              |                 | FPKM    |      | Log <sub>2</sub> Ratio | R    | FDR      |                                                                        |
|              |                 | Control | IPU  |                        |      |          |                                                                        |
| 1            | Os08t0314800-03 | 391     | 1    | -8.61                  | down | 6.02E-17 | Hypothetical conserved gene.                                           |
| 2            | Os03t0749300-04 | 357     | 1    | -8.48                  | down | 4.32E-16 | Similar to Cell wall beta-glucosidase.                                 |
| 3            | Os03t0405500-02 | 320     | 1    | -8.32                  | down | 4.35E-15 | Hypothetical conserved gene.                                           |
| 4            | Os07t0645400-02 | 246     | 1    | -7.94                  | down | 7.93E-13 | Similar to NADH-ubiquinone oxidoreductase 51 kDa subunit.              |
| 5            | Os12t0566000-03 | 186     | 1    | -7.54                  | down | 1.10E-10 | Similar to Boron transporter.                                          |
| 6            | Os03t0805400-03 | 137     | 1    | -7.10                  | down | 1.12E-08 | Similar to phosphoric ester hydrolase.                                 |
| 7            | Os04t0439100-03 | 137     | 1    | -7.10                  | down | 1.12E-08 | Similar to H0525C06.4 protein.                                         |
| 8            | Os09t0557900-02 | 254     | 2    | -6.99                  | down | 2.55E-12 | Similar to Protein phosphatase 2C gamma isoform (EC 3.1.3.16)          |
| 9            | Os11t0199200-02 | 232     | 2    | -6.86                  | down | 1.33E-11 | Similar to Protein disulfide isomerase.                                |
| 10           | Os03t0751100-02 | 275     | 3    | -6.52                  | down | 2.48E-12 | Similar to Glutathione transporter.                                    |
| 11           | Os04t0556300-02 | 81      | 1    | -6.34                  | down | 6.00E-06 | Similar to Glutathione peroxidase.                                     |
| 12           | Os09t0322000-03 | 70      | 1    | -6.13                  | down | 2.45E-05 | Similar to sugar transport protein 14.                                 |
| 13           | Os02t0759800-02 | 127     | 2    | -5.99                  | down | 1.34E-07 | Similar to pre-mRNA-splicing factor prp45.                             |
| 14           | Os09t0381400-02 | 171     | 3    | -5.83                  | down | 7.55E-09 | Similar to cysteine protease.                                          |
| 15           | Os07t0195100-02 | 157     | 3    | -5.71                  | down | 2.60E-08 | Similar to Ras-related protein ARA-3.                                  |
| 16           | Os01t0326000-02 | 49      | 1    | -5.61                  | down | 4.32E-04 | Similar to Class III peroxidase 13.                                    |
| 17           | Os08t0345700-02 | 223     | 5    | -5.48                  | down | 9.79E-10 | Similar to Fructose-6-phosphate 1-phosphotransferase (Fragment).       |
| 18           | Os05t0282900-01 | 81      | 2    | -5.34                  | down | 2.08E-05 | Conserved hypothetical protein.                                        |
| 19           | Os03t0136900-02 | 155     | 4    | -5.28                  | down | 8.79E-08 | Similar to Aconitate hydratase 2, mitochondrial.                       |
| 20           | Os11t0414000-02 | 115     | 3    | -5.26                  | down | 1.41E-06 | Similar to predicted protein.                                          |
| 21           | Os09t0482300-01 | 38      | 1    | -5.25                  | down | 2.17E-03 | Late embryogenesis abundant protein, LEA-18 domain containing protein. |
| 22           | Os09t0482550-01 | 38      | 1    | -5.25                  | down | 2.17E-03 | Late embryogenesis abundant protein, LEA-18 domain containing protein. |
| 23           | Os05t0107600-01 | 37      | 1    | -5.21                  | down | 2.52E-03 | ABC transporter-like domain containing protein.                        |
| 24           | Os08t0536100-04 | 37      | 1    | -5.21                  | down | 2.52E-03 | Hypothetical conserved gene.                                           |
| 25           | Os11t0244100-00 | 37      | 1    | -5.21                  | down | 2.52E-03 | Transferase family protein.                                            |

|    |                 |     |    |       |      |          |                                                                       |
|----|-----------------|-----|----|-------|------|----------|-----------------------------------------------------------------------|
| 26 | Os01t0842200-02 | 110 | 3  | -5.20 | down | 2.35E-06 | Similar to SCARECROW-like protein.                                    |
| 27 | Os02t0702500-02 | 36  | 1  | -5.17 | down | 2.93E-03 | Similar to B0403H10-OSIGBa0105A11.22 protein.                         |
| 28 | Os09t0560700-02 | 35  | 1  | -5.13 | down | 3.41E-03 | Molybdenum cofactor sulfuryase, C-terminal domain containing protein. |
| 29 | Os12t0109700-01 | 34  | 1  | -5.09 | down | 3.98E-03 | Protein of unknown function DUF2985 domain containing protein.        |
| 30 | Os02t0680400-02 | 32  | 1  | -5.00 | down | 5.40E-03 | Similar to CAAX prenyl protease 1 homolog.                            |
| 31 | Os07t0583600-03 | 64  | 2  | -5.00 | down | 1.67E-04 | Similar to Chitin-inducible gibberellin-responsive protein 2.         |
| 32 | Os02t0580966-00 | 31  | 1  | -4.95 | down | 6.30E-03 | Hypothetical protein.                                                 |
| 33 | Os03t0239300-03 | 213 | 7  | -4.93 | down | 1.12E-08 | Zinc finger, C2H2-type domain containing protein.                     |
| 34 | Os02t0577700-00 | 30  | 1  | -4.91 | down | 7.36E-03 | Similar to H0815C01.4 protein.                                        |
| 35 | Os06t0705600-00 | 29  | 1  | -4.86 | down | 8.60E-03 | Oligopeptide transporter domain containing protein.                   |
| 36 | Os08t0113100-02 | 768 | 27 | -4.83 | down | 6.15E-14 | Similar to cDNA clone:J023041C07, full insert sequence.               |
| 37 | Os03t0826600-02 | 169 | 6  | -4.82 | down | 1.50E-07 | Similar to Hydrolase, acting on ester bonds.                          |
| 38 | Os02t0595100-02 | 56  | 2  | -4.81 | down | 4.68E-04 | Similar to N-acetylglucosaminyltransferase III.                       |
| 39 | Os03t0702000-03 | 28  | 1  | -4.81 | down | 1.01E-02 | UDP-glucuronosyl/UDP-glucosyltransferase family protein.              |
| 40 | Os05t0401100-02 | 28  | 1  | -4.81 | down | 1.01E-02 | Protein of unknown function DUF477 family protein.                    |
| 41 | Os09t0114500-02 | 56  | 2  | -4.81 | down | 4.68E-04 | Similar to Kinesin-like protein.                                      |
| 42 | Os09t0284200-02 | 27  | 1  | -4.75 | down | 1.18E-02 | Similar to Serine/threonine protein phosphatase.                      |
| 43 | Os01t0119000-02 | 106 | 4  | -4.73 | down | 8.68E-06 | Glycosyltransferase AER61, uncharacterized domain containing protein. |
| 44 | Os04t0560100-02 | 26  | 1  | -4.70 | down | 1.38E-02 | Conserved hypothetical protein.                                       |
| 45 | Os08t0274700-02 | 260 | 10 | -4.70 | down | 3.85E-09 | Similar to TTN10.                                                     |
| 46 | Os09t0435100-01 | 26  | 1  | -4.70 | down | 1.38E-02 | Hypothetical gene.                                                    |
| 47 | Os06t0319366-00 | 307 | 12 | -4.68 | down | 8.27E-10 | Hypothetical genes.                                                   |
| 48 | Os04t0562000-01 | 25  | 1  | -4.64 | down | 1.62E-02 | Zinc finger, DHHC-type domain containing protein.                     |
| 49 | Os07t0176200-02 | 25  | 1  | -4.64 | down | 1.62E-02 | Similar to Transcription factor CPP.                                  |
| 50 | Os01t0729900-04 | 73  | 3  | -4.60 | down | 1.36E-04 | Similar to predicted protein.                                         |
| 51 | Os01t0236700-02 | 24  | 1  | -4.58 | down | 1.90E-02 | Hypothetical conserved gene.                                          |
| 52 | Os05t0162200-01 | 24  | 1  | -4.58 | down | 1.90E-02 | Conserved hypothetical protein.                                       |
| 53 | Os07t0501900-01 | 24  | 1  | -4.58 | down | 1.90E-02 | Similar to predicted protein.                                         |
| 54 | Os12t0182200-02 | 24  | 1  | -4.58 | down | 1.90E-02 | Similar to Dihydrolipoyllysine-residue acetyltransferase              |
| 55 | Os12t0431850-00 | 24  | 1  | -4.58 | down | 1.90E-02 | Hypothetical protein.                                                 |

|    |                 |     |    |       |      |          |                                                                                        |
|----|-----------------|-----|----|-------|------|----------|----------------------------------------------------------------------------------------|
| 56 | Os03t0268900-01 | 23  | 1  | -4.52 | down | 2.23E-02 | Similar to tropinone reductase.                                                        |
| 57 | Os12t0102500-02 | 23  | 1  | -4.52 | down | 2.23E-02 | Serine/threonine protein kinase-related domain containing protein.                     |
| 58 | Os06t0146500-00 | 22  | 1  | -4.46 | down | 2.62E-02 | Hypothetical conserved gene.                                                           |
| 59 | Os07t0121500-00 | 22  | 1  | -4.46 | down | 2.62E-02 | Hypothetical conserved gene.                                                           |
| 60 | Os07t0168600-02 | 149 | 7  | -4.41 | down | 1.55E-06 | Similar to 3-glucanase.                                                                |
| 61 | Os02t0217250-00 | 21  | 1  | -4.39 | down | 3.09E-02 | Hypothetical protein.                                                                  |
| 62 | Os03t0744100-01 | 21  | 1  | -4.39 | down | 3.09E-02 | Similar to SKIP interacting protein 16.                                                |
| 63 | Os08t0532500-02 | 21  | 1  | -4.39 | down | 3.09E-02 | Conserved hypothetical protein.                                                        |
| 64 | Os03t0170900-02 | 20  | 1  | -4.32 | down | 3.64E-02 | Similar to Sucrose transporter.                                                        |
| 65 | Os03t0183800-02 | 20  | 1  | -4.32 | down | 3.64E-02 | Similar to Leucine-rich repeat transmembrane protein kinase 1 (Fragment).              |
| 66 | Os04t0605300-02 | 20  | 1  | -4.32 | down | 3.64E-02 | Leucine-rich repeat, typical subtype containing protein.                               |
| 67 | Os05t0102800-04 | 20  | 1  | -4.32 | down | 3.64E-02 | Similar to AML6.                                                                       |
| 68 | Os10t0555900-01 | 40  | 2  | -4.32 | down | 4.00E-03 | Similar to Beta-expansin.                                                              |
| 69 | Os02t0830100-03 | 39  | 2  | -4.29 | down | 4.59E-03 | Similar to predicted protein.                                                          |
| 70 | Os10t0534500-02 | 390 | 20 | -4.29 | down | 7.54E-10 | Similar to Resistance protein candidate (Fragment).                                    |
| 71 | Os01t0253100-02 | 58  | 3  | -4.27 | down | 8.19E-04 | Hypothetical conserved gene.                                                           |
| 72 | Os09t0279500-03 | 19  | 1  | -4.25 | down | 4.30E-02 | Similar to Plastid-specific 30S ribosomal protein 2, chloroplast precursor (PSRP- 2).  |
| 73 | Os11t0457300-01 | 19  | 1  | -4.25 | down | 4.30E-02 | UDP-glucuronosyl/UDP-glucosyltransferase family protein.                               |
| 74 | Os02t0451900-01 | 37  | 2  | -4.21 | down | 6.07E-03 | Conserved hypothetical protein.                                                        |
| 75 | Os08t0234000-02 | 37  | 2  | -4.21 | down | 6.07E-03 | Similar to 60S ribosomal protein L7-2.                                                 |
| 76 | Os12t0221600-01 | 145 | 8  | -4.18 | down | 3.97E-06 | Conserved hypothetical protein.                                                        |
| 77 | Os02t0217600-01 | 70  | 4  | -4.13 | down | 4.02E-04 | Similar to Isoform 2 of Serine/threonine-protein phosphatase PP2A-3 catalytic subunit. |
| 78 | Os04t0412300-02 | 35  | 2  | -4.13 | down | 8.02E-03 | Glycoside hydrolase, family 17 protein.                                                |
| 79 | Os05t0177900-00 | 35  | 2  | -4.13 | down | 8.02E-03 | Conserved hypothetical protein.                                                        |
| 80 | Os05t0385400-01 | 35  | 2  | -4.13 | down | 8.02E-03 | Conserved hypothetical protein.                                                        |
| 81 | Os06t0694200-01 | 35  | 2  | -4.13 | down | 8.02E-03 | Esterase, SGNH hydrolase-type domain containing protein.                               |
| 82 | Os09t0412700-01 | 87  | 5  | -4.12 | down | 1.24E-04 | Conserved hypothetical protein.                                                        |
| 83 | Os01t0172400-04 | 86  | 5  | -4.10 | down | 1.37E-04 | Similar to Phospholipase D alpha 1.                                                    |
| 84 | Os01t0101900-00 | 85  | 5  | -4.09 | down | 1.52E-04 | Similar to OSIGBa0075F02.3 protein.                                                    |
| 85 | Os01t0971800-00 | 68  | 4  | -4.09 | down | 5.04E-04 | Similar to Two-component response regulator ARR11.                                     |



|     |                 |      |     |       |      |          |                                                                         |
|-----|-----------------|------|-----|-------|------|----------|-------------------------------------------------------------------------|
| 86  | Os03t0264400-02 | 34   | 2   | -4.09 | down | 9.23E-03 | Similar to Anthranilate synthase component I family protein, expressed. |
| 87  | Os02t0820400-02 | 101  | 6   | -4.07 | down | 5.75E-05 | Transferase family protein.                                             |
| 88  | Os07t0529600-01 | 2646 | 158 | -4.07 | down | 4.34E-13 | Similar to Thiazole biosynthetic enzyme 1-1, chloroplast precursor.     |
| 89  | Os04t0233400-02 | 1811 | 109 | -4.05 | down | 8.65E-13 | Similar to cDNA clone:006-302-B10, full insert sequence.                |
| 90  | Os01t0296200-00 | 111  | 7   | -3.99 | down | 4.06E-05 | Similar to polygalacturonase.                                           |
| 91  | Os03t0819600-02 | 346  | 22  | -3.98 | down | 1.23E-08 | Chalcone isomerase (EC 5.5.1.6).                                        |
| 92  | Os04t0530500-02 | 1141 | 73  | -3.97 | down | 9.19E-12 | Zinc finger, RING/FYVE/PHD-type domain containing protein.              |
| 93  | Os02t0569900-01 | 31   | 2   | -3.95 | down | 1.41E-02 | Cytochrome P450 family protein.                                         |
| 94  | Os05t0429500-01 | 31   | 2   | -3.95 | down | 1.41E-02 | Similar to dienelactone hydrolase family protein.                       |
| 95  | Os06t0683000-03 | 31   | 2   | -3.95 | down | 1.41E-02 | Hypothetical conserved gene.                                            |
| 96  | Os04t0178300-02 | 92   | 6   | -3.94 | down | 1.37E-04 | Similar to Syn-copalyl diphosphate synthase.                            |
| 97  | Os01t0871900-00 | 60   | 4   | -3.91 | down | 1.26E-03 | Similar to POT family protein.                                          |
| 98  | Os04t0616600-01 | 30   | 2   | -3.91 | down | 1.63E-02 | Serine/threonine protein kinase-related domain containing protein.      |
| 99  | Os09t0326900-02 | 224  | 15  | -3.90 | down | 4.91E-07 | Similar to BRI1-KD interacting protein 107 (Fragment).                  |
| 100 | Os08t0534350-00 | 44   | 3   | -3.87 | down | 4.71E-03 | Similar to cation cation antiporter.                                    |
| 101 | Os01t0282866-00 | 29   | 2   | -3.86 | down | 1.87E-02 | Hypothetical protein.                                                   |
| 102 | Os01t0740400-01 | 29   | 2   | -3.86 | down | 1.87E-02 | Protein of unknown function DUF1005 family protein.                     |
| 103 | Os08t0380100-02 | 86   | 6   | -3.84 | down | 2.48E-04 | Similar to Polygalacturonase isoenzyme 1 beta subunit (Fragment).       |
| 104 | Os02t0552200-00 | 28   | 2   | -3.81 | down | 2.16E-02 | Conserved hypothetical protein.                                         |
| 105 | Os09t0452800-01 | 126  | 9   | -3.81 | down | 3.20E-05 | Peptidase A1 domain containing protein.                                 |
| 106 | Os02t0200900-04 | 353  | 26  | -3.76 | down | 3.65E-08 | Similar to F-box family member.                                         |
| 107 | Os03t0324300-02 | 705  | 52  | -3.76 | down | 4.89E-10 | Similar to ETHYLENE-INSENSITIVE3-like 1 protein.                        |
| 108 | Os11t0100800-01 | 40   | 3   | -3.74 | down | 7.86E-03 | Similar to Exo70 exocyst complex subunit family protein.                |
| 109 | Os06t0606599-00 | 53   | 4   | -3.73 | down | 2.84E-03 | Hypothetical protein.                                                   |
| 110 | Os05t0474700-01 | 26   | 2   | -3.70 | down | 2.88E-02 | Conserved hypothetical protein.                                         |
| 111 | Os07t0569166-01 | 65   | 5   | -3.70 | down | 1.27E-03 | Conserved hypothetical protein.                                         |
| 112 | Os08t0476300-02 | 39   | 3   | -3.70 | down | 8.95E-03 | Glucose/ribitol dehydrogenase family protein.                           |
| 113 | Os09t0505700-01 | 26   | 2   | -3.70 | down | 2.88E-02 | Aldolase-type TIM barrel domain containing protein.                     |
| 114 | Os10t0569600-00 | 26   | 2   | -3.70 | down | 2.88E-02 | Similar to RIR1b protein precursor.                                     |
| 115 | Os05t0208500-01 | 62   | 5   | -3.63 | down | 1.77E-03 | Hypothetical protein.                                                   |

|     |                 |     |    |       |      |          |                                                                         |
|-----|-----------------|-----|----|-------|------|----------|-------------------------------------------------------------------------|
| 116 | Os01f0871800-01 | 37  | 3  | -3.62 | down | 1.16E-02 | TGF-beta receptor, type I/II extracellular region family protein.       |
| 117 | Os02t0120100-02 | 74  | 6  | -3.62 | down | 8.31E-04 | Similar to ATP binding protein.                                         |
| 118 | Os05t0239151-00 | 49  | 4  | -3.61 | down | 4.56E-03 | Hypothetical protein.                                                   |
| 119 | Os02t0727300-03 | 48  | 4  | -3.58 | down | 5.14E-03 | Similar to ubiquitin-protein ligase.                                    |
| 120 | Os02t0799300-02 | 24  | 2  | -3.58 | down | 3.85E-02 | Similar to predicted protein.                                           |
| 121 | Os06t0490200-03 | 24  | 2  | -3.58 | down | 3.85E-02 | Conserved hypothetical protein.                                         |
| 122 | Os02t0569400-02 | 35  | 3  | -3.54 | down | 1.50E-02 | Similar to Cyt-P450 monooxygenase.                                      |
| 123 | Os10t0476700-03 | 35  | 3  | -3.54 | down | 1.50E-02 | Esterase, SGNH hydrolase-type, subgroup domain containing protein.      |
| 124 | Os07t0181000-02 | 58  | 5  | -3.54 | down | 2.75E-03 | Similar to Pyruvate kinase.                                             |
| 125 | Os01t0974200-03 | 23  | 2  | -3.52 | down | 4.45E-02 | Conserved hypothetical protein.                                         |
| 126 | Os03t0273200-01 | 23  | 2  | -3.52 | down | 4.45E-02 | Similar to Laccase (EC 1.10.3.2).                                       |
| 127 | Os03t0410300-02 | 23  | 2  | -3.52 | down | 4.45E-02 | Protein of unknown function DUF1313 family protein.                     |
| 128 | Os03t0301700-01 | 80  | 7  | -3.51 | down | 7.43E-04 | Similar to Calmodulin-binding protein phosphatase.                      |
| 129 | Os02t0114200-02 | 194 | 17 | -3.51 | down | 6.91E-06 | Similar to Serine carboxypeptidase 3.                                   |
| 130 | Os03t0274000-02 | 125 | 11 | -3.51 | down | 8.53E-05 | Similar to oxysterol-binding protein.                                   |
| 131 | Os06t0111500-02 | 305 | 27 | -3.50 | down | 4.38E-07 | Similar to 6-phosphogluconate dehydrogenase, decarboxylating.           |
| 132 | Os03t0334800-02 | 177 | 16 | -3.47 | down | 1.43E-05 | Similar to Lung seven transmembrane receptor family protein, expressed. |
| 133 | Os01t0882800-01 | 22  | 2  | -3.46 | down | 5.16E-02 | Similar to Amino acid carrier (Fragment).                               |
| 134 | Os02t0238500-01 | 22  | 2  | -3.46 | down | 5.16E-02 | Similar to scramblase family protein.                                   |
| 135 | Os02t0255200-02 | 44  | 4  | -3.46 | down | 8.28E-03 | Similar to 40S ribosomal protein S15a.                                  |
| 136 | Os03t0679100-01 | 22  | 2  | -3.46 | down | 5.16E-02 | Vacuolar protein sorting-associated protein 26 family protein.          |
| 137 | Os07t0660466-00 | 22  | 2  | -3.46 | down | 5.16E-02 | Hypothetical protein.                                                   |
| 138 | Os09t0558300-02 | 22  | 2  | -3.46 | down | 5.16E-02 | Similar to cyclic nucleotide-gated ion channel 14.                      |
| 139 | Os12t0104900-00 | 22  | 2  | -3.46 | down | 5.16E-02 | EF-HAND 2 domain containing protein.                                    |
| 140 | Os12t0621300-01 | 22  | 2  | -3.46 | down | 5.16E-02 | Hypothetical conserved gene.                                            |
| 141 | Os03t0442800-01 | 32  | 3  | -3.42 | down | 2.23E-02 | Hypothetical gene.                                                      |
| 142 | Os07t0152900-04 | 32  | 3  | -3.42 | down | 2.23E-02 | Similar to Glycolate oxidase (EC 1.1.3.15) (Fragment).                  |
| 143 | Os02t0640800-01 | 21  | 2  | -3.39 | down | 5.97E-02 | Similar to Carbonyl reductase 1.                                        |
| 144 | Os02t0699850-01 | 21  | 2  | -3.39 | down | 5.97E-02 | Hypothetical gene.                                                      |
| 145 | Os10t0109750-00 | 21  | 2  | -3.39 | down | 5.97E-02 | Hypothetical protein.                                                   |

|     |                 |     |    |       |      |          |                                                                 |
|-----|-----------------|-----|----|-------|------|----------|-----------------------------------------------------------------|
| 146 | Os12t0635700-01 | 52  | 5  | -3.38 | down | 5.35E-03 | Similar to GNS1/SUR4 membrane protein.                          |
| 147 | Os01t0653350-00 | 31  | 3  | -3.37 | down | 2.54E-02 | Similar to WD-40 repeat family protein (Fragment).              |
| 148 | Os01t0121100-01 | 101 | 10 | -3.34 | down | 4.02E-04 | Similar to SLL2.                                                |
| 149 | Os04t0497400-01 | 20  | 2  | -3.32 | down | 6.93E-02 | Similar to 6,7-dimethyl-8-ribityllumazine synthase (Fragment).  |
| 150 | Os05t0556650-00 | 20  | 2  | -3.32 | down | 6.93E-02 | Hypothetical gene.                                              |
| 151 | Os07t0123400-01 | 20  | 2  | -3.32 | down | 6.93E-02 | Similar to ternary complex factor MIP1.                         |
| 152 | Os07t0152101-01 | 20  | 2  | -3.32 | down | 6.93E-02 | Hypothetical gene.                                              |
| 153 | Os08t0427300-02 | 30  | 3  | -3.32 | down | 2.89E-02 | Similar to Myrosinase (Fragment).                               |
| 154 | Os09t0555500-01 | 50  | 5  | -3.32 | down | 6.70E-03 | Similar to Chloroplast phytoene synthase 3.                     |
| 155 | Os11t0474500-00 | 20  | 2  | -3.32 | down | 6.93E-02 | NB-ARC domain containing protein.                               |
| 156 | Os01t0186900-01 | 49  | 5  | -3.29 | down | 7.50E-03 | Similar to cDNA clone:001-117-G12, full insert sequence.        |
| 157 | Os02t0771666-00 | 68  | 7  | -3.28 | down | 2.42E-03 | Hypothetical gene.                                              |
| 158 | Os03t0300600-03 | 136 | 14 | -3.28 | down | 1.17E-04 | Similar to Chaperone protein dnaJ.                              |
| 159 | Os01t0901550-00 | 29  | 3  | -3.27 | down | 3.30E-02 | Hypothetical gene.                                              |
| 160 | Os04t0137100-00 | 29  | 3  | -3.27 | down | 3.30E-02 | Similar to OSIGBa0147B06.7 protein.                             |
| 161 | Os01t0290000-04 | 19  | 2  | -3.25 | down | 8.04E-02 | Similar to retrotransposon protein SINE subclass.               |
| 162 | Os01t0821800-03 | 19  | 2  | -3.25 | down | 8.04E-02 | Nucleic acid-binding, OB-fold-like domain containing protein.   |
| 163 | Os03t0383800-03 | 38  | 4  | -3.25 | down | 1.71E-02 | Nucleotide-binding, alpha-beta plait domain containing protein. |
| 164 | Os11t0547000-01 | 57  | 6  | -3.25 | down | 4.88E-03 | Similar to FKF1.                                                |
| 165 | Os01t0174700-03 | 47  | 5  | -3.23 | down | 9.40E-03 | Similar to predicted protein.                                   |
| 166 | Os11t0489250-00 | 312 | 34 | -3.20 | down | 2.00E-06 | Similar to Cytochrome P450 family protein, expressed.           |
| 167 | Os01t0191200-01 | 27  | 3  | -3.17 | down | 4.30E-02 | Similar to Acid phosphatase.                                    |
| 168 | Os01t0276066-00 | 18  | 2  | -3.17 | down | 9.34E-02 | Non-protein coding transcript.                                  |
| 169 | Os03t0656000-00 | 18  | 2  | -3.17 | down | 9.34E-02 | Hypothetical conserved gene.                                    |
| 170 | Os04t0437600-02 | 18  | 2  | -3.17 | down | 9.34E-02 | Similar to H0315A08.7 protein.                                  |
| 171 | Os04t0448800-02 | 18  | 2  | -3.17 | down | 9.34E-02 | Similar to Mitochondrial phosphate transporter (Fragment).      |
| 172 | Os05t0121850-01 | 18  | 2  | -3.17 | down | 9.34E-02 | Hypothetical gene.                                              |
| 173 | Os08t0278600-01 | 27  | 3  | -3.17 | down | 4.30E-02 | Similar to complex 1 protein containing protein.                |
| 174 | Os09t0493800-02 | 27  | 3  | -3.17 | down | 4.30E-02 | Similar to Chaperone protein dnaJ 10 (AtJ10) (AtDjC10).         |
| 175 | Os03t0181100-01 | 209 | 24 | -3.12 | down | 2.46E-05 | Tify domain containing protein.                                 |

|     |                 |     |    |       |      |          |                                                                           |
|-----|-----------------|-----|----|-------|------|----------|---------------------------------------------------------------------------|
| 176 | Os05t0535700-02 | 52  | 6  | -3.12 | down | 8.30E-03 | Conserved hypothetical protein.                                           |
| 177 | Os07t0538250-00 | 26  | 3  | -3.12 | down | 4.91E-02 | Hypothetical protein.                                                     |
| 178 | Os10t0416100-02 | 26  | 3  | -3.12 | down | 4.91E-02 | Similar to Chitinase (Fragment).                                          |
| 179 | Os04t0533300-02 | 69  | 8  | -3.11 | down | 3.28E-03 | Similar to remorin.                                                       |
| 180 | Os12t0617400-01 | 77  | 9  | -3.10 | down | 2.26E-03 | Viviparous-14.                                                            |
| 181 | Os05t0142200-00 | 34  | 4  | -3.09 | down | 2.78E-02 | Conserved hypothetical protein.                                           |
| 182 | Os03t0806700-02 | 211 | 25 | -3.08 | down | 2.87E-05 | Protein of unknown function DUF868, plant family protein.                 |
| 183 | Os01t0667550-00 | 25  | 3  | -3.06 | down | 5.61E-02 | Hypothetical gene.                                                        |
| 184 | Os01t0834200-03 | 25  | 3  | -3.06 | down | 5.61E-02 | Similar to T-cell immune regulator 1 transcript variant 3 (Fragment).     |
| 185 | Os04t0380200-01 | 50  | 6  | -3.06 | down | 1.03E-02 | Conserved hypothetical protein.                                           |
| 186 | Os01t0600900-03 | 83  | 10 | -3.05 | down | 1.89E-03 | Similar to Chlorophyll a-b binding protein 2, chloroplastic.              |
| 187 | Os03t0282900-02 | 114 | 14 | -3.03 | down | 5.83E-04 | Conserved hypothetical protein.                                           |
| 188 | Os02t0467600-01 | 32  | 4  | -3.00 | down | 3.55E-02 | Similar to Cinnamate 4-hydroxylase CYP73.                                 |
| 189 | Os04t0499100-01 | 32  | 4  | -3.00 | down | 3.55E-02 | Biopterin transport-related protein BT1 family protein.                   |
| 190 | Os04t0501600-02 | 24  | 3  | -3.00 | down | 6.40E-02 | Similar to H0311C03.6 protein.                                            |
| 191 | Os06t0228200-03 | 24  | 3  | -3.00 | down | 6.40E-02 | Similar to NOD26-like membrane integral protein.                          |
| 192 | Os07t0529600-02 | 96  | 12 | -3.00 | down | 1.24E-03 | Similar to Pathogen-induced defense-responsive protein 8.                 |
| 193 | Os12t0221400-01 | 32  | 4  | -3.00 | down | 3.55E-02 | Similar to cDNA clone:001-112-B09, full insert sequence.                  |
| 194 | Os03t0321900-01 | 63  | 8  | -2.98 | down | 5.83E-03 | Similar to tRNA-specific adenosine deaminase.                             |
| 195 | Os02t0817800-01 | 47  | 6  | -2.97 | down | 1.42E-02 | Similar to Telomere binding protein-1.                                    |
| 196 | Os05t0316100-01 | 47  | 6  | -2.97 | down | 1.42E-02 | Zinc/iron permease family protein.                                        |
| 197 | Os06t0709100-02 | 94  | 12 | -2.97 | down | 1.46E-03 | Cyclin-like F-box domain containing protein.                              |
| 198 | Os07t0618400-02 | 39  | 5  | -2.96 | down | 2.33E-02 | Similar to Leucine-rich repeat transmembrane protein kinase 1 (Fragment). |
| 199 | Os12t0165000-02 | 39  | 5  | -2.96 | down | 2.33E-02 | Similar to predicted protein.                                             |
| 200 | Os09t0483150-00 | 31  | 4  | -2.95 | down | 4.02E-02 | Hypothetical gene.                                                        |

---

**ESI Table S7.** Forty most abundant genes in the four libraries of *Oryza sativa* based on the expressed tag frequency. The order of other three libraries is subject to the order Shoot+IPU, Shoot-IPU, Root+IPU and Root-IPU, respectively. Red regions indicate the up-regulation. Blue regions indicate the down-regulation.

| Rank overall | Gene ID         | Shoot+IPU | Signature abundance |                                         |          |          |                                        | Description                                               |
|--------------|-----------------|-----------|---------------------|-----------------------------------------|----------|----------|----------------------------------------|-----------------------------------------------------------|
|              |                 | Up        | Shoot-IPU           | Log <sub>2</sub> Ratio <sub>shoot</sub> | Root+IPU | Root-IPU | Log <sub>2</sub> Ratio <sub>root</sub> |                                                           |
| 1            | Os11t0703900-01 | 107000    | 47000               | 1.19                                    | 141387   | 162259   | -0.20                                  | Heat shock protein 70.                                    |
| 2            | Os01t0256500-02 | 85500     | 38700               | 1.14                                    | 304017   | 216413   | 0.49                                   | Similar to ZnI.                                           |
| 3            | Os02t0161900-01 | 52000     | 13500               | 1.94                                    | 71434    | 47584    | 0.59                                   | Similar to polyubiquitin containing 7 ubiquitin monomers. |
| 4            | Os05t0375400-01 | 46400     | 16400               | 1.5                                     | 36186    | 19473    | 0.89                                   | Beta-glucanase precursor.                                 |
| 5            | Os03t0146100-01 | 46400     | 18700               | 1.31                                    | 67463    | 51536    | 0.39                                   | Tonoplast intrinsic protein (Tonoplast water channel).    |
| 6            | Os02t0465900-01 | 40500     | 11100               | 1.87                                    | 21290    | 15834    | 0.43                                   | ChaC-like protein family protein.                         |
| 7            | Os04t0667800-01 | 34800     | 15200               | 1.19                                    | 32084    | 26911    | 0.25                                   | Ubiquitin-conjugating enzyme.                             |
| 8            | Os04t0679400-04 | 33700     | 4880                | 2.79                                    | 14138    | 8220     | 0.78                                   | Similar to H0801D08.15 protein.                           |
| 9            | Os06t0336200-01 | 32200     | 14000               | 1.2                                     | 16013    | 16267    | -0.02                                  | Delta-tonoplast intrinsic protein.                        |
| 10           | Os05t0176700-01 | 31900     | 8180                | 1.96                                    | 17729    | 10955    | 0.69                                   | Conserved hypothetical protein.                           |
| 11           | Os06t0612800-01 | 31300     | 12000               | 1.39                                    | 51759    | 41822    | 0.31                                   | Similar to PVPR3 protein.                                 |
| 12           | Os06t0561000-01 | 29700     | 2020                | 3.88                                    | 10873    | 3384     | 1.68                                   | Similar to Myo-inositol oxygenase.                        |
| 13           | Os08t0473900-02 | 24900     | 139                 | 7.49                                    | 0        | 23       | -Inf                                   | Similar to Alpha amylase isozyme 3D.                      |
| 14           | Os02t0606200-01 | 24200     | 11400               | 1.09                                    | 15749    | 8808     | 0.84                                   | Zinc finger, B-box domain containing protein.             |
| 15           | Os12t0428000-01 | 23700     | 2900                | 3.03                                    | 12300    | 8043     | 0.61                                   | Similar to senescence-associated protein DIN1.            |
| 16           | Os05t0344200-01 | 21200     | 7930                | 1.42                                    | 10719    | 8994     | 0.25                                   | Conserved hypothetical protein.                           |
| 17           | Os09t0482400-01 | 20100     | 6710                | 1.58                                    | 9621     | 9287     | 0.05                                   | Similar to Heat shock protein 81-3.                       |
| 18           | Os05t0489600-01 | 19800     | 8940                | 1.14                                    | 21473    | 17218    | 0.32                                   | Similar to ADP-ribosylation factor 1.                     |
| 19           | Os09t0482100-01 | 19100     | 5550                | 1.78                                    | 9781     | 10249    | -0.07                                  | Similar to Heat shock protein 82.                         |
| 20           | Os04t0598000-01 | 18700     | 4870                | 1.94                                    | 5581     | 4381     | 0.35                                   | Similar to OSJNba0093F12.14 protein.                      |
| 21           | Os03t0291500-01 | 18100     | 640                 | 4.82                                    | 2231     | 2083     | 0.10                                   | Similar to Asparagine synthetase.                         |
| 22           | Os03t0701200-01 | 18000     | 2360                | 2.93                                    | 5470     | 2309     | 1.24                                   | Similar to Sugar-starvation induced protein.              |
| 23           | Os03t0342900-02 | 17900     | 7770                | 1.2                                     | 8564     | 6217     | 0.46                                   | Dormancyauxin associated family protein.                  |

|    |                 |       |      |      |       |       |       |                                                                                |
|----|-----------------|-------|------|------|-------|-------|-------|--------------------------------------------------------------------------------|
| 24 | Os05t0489600-03 | 17600 | 8420 | 1.06 | 20671 | 15749 | 0.39  | Similar to ADP-ribosylation factor 1.                                          |
| 25 | Os04t0555300-01 | 16600 | 6350 | 1.39 | 5276  | 3973  | 0.41  | Similar to glycerol 3-phosphate permease.                                      |
| 26 | Os03t0231600-01 | 15800 | 1790 | 3.14 | 7266  | 2421  | 1.59  | Similar to Branched-chain-amino-acid aminotransferase 3.                       |
| 27 | Os01t0681600-02 | 15000 | 4310 | 1.8  | 10595 | 7067  | 0.58  | Spliceosome associated protein 61(SAP 61).                                     |
| 28 | Os05t0129300-02 | 14800 | 5900 | 1.33 | 12490 | 8004  | 0.64  | Basic/leucine zipper protein.                                                  |
| 29 | Os09t0553900-01 | 14500 | 6260 | 1.21 | 61    | 52    | 0.23  | Conserved hypothetical protein.                                                |
| 30 | Os05t0171900-01 | 14000 | 1000 | 3.81 | 4584  | 1743  | 1.40  | Glyoxalase/bleomycin resistance protein/dioxygenase domain containing protein. |
| 31 | Os03t0266300-03 | 13300 | 1920 | 2.79 | 9988  | 4018  | 1.31  | Class I low-molecular-weight heat shock protein 17.9.                          |
| 32 | Os06t0172800-00 | 13300 | 568  | 4.55 | 6254  | 2545  | 1.30  | Similar to alkaline alpha galactosidase 2.                                     |
| 33 | Os02t0670900-02 | 13300 | 3080 | 2.11 | 2460  | 1661  | 0.57  | Similar to amino acid transport protein.                                       |
| 34 | Os01t0332100-01 | 13200 | 5670 | 1.22 | 211   | 136   | 0.63  | Similar to Neutral invertase-like protein.                                     |
| 35 | Os04t0583200-01 | 12800 | 1330 | 3.26 | 13391 | 7199  | 0.90  | Conserved hypothetical protein.                                                |
| 36 | Os07t0663800-01 | 12600 | 5110 | 1.3  | 3372  | 2430  | 0.47  | Similar to Oxidoreductase, short chain dehydrogenase/reductase family protein. |
| 37 | Os07t0559700-00 | 12400 | 2250 | 2.46 | 1505  | 861   | 0.81  | Similar to Monosaccharide transporter 3.                                       |
| 38 | Os01t0916400-01 | 12200 | 2610 | 2.23 | 1848  | 859   | 1.11  | Similar to Selenium binding protein.                                           |
| 39 | Os11t0106700-02 | 11800 | 5540 | 1.1  | 91    | 122   | -0.42 | Similar to Ferritin 1, chloroplast precursor(ZmFer1).                          |
| 40 | Os01t0188400-01 | 11300 | 4910 | 1.2  | 8049  | 4489  | 0.84  | NADP-dependent malic enzyme, chloroplast precursor(NADP-ME).                   |

| Rank overall | Gene ID         | Shoot-IPU |           | Signature abundance                     |          |          |                                        | Description                                                             |
|--------------|-----------------|-----------|-----------|-----------------------------------------|----------|----------|----------------------------------------|-------------------------------------------------------------------------|
|              |                 | Down      | Shoot+IPU | Log <sub>2</sub> Ratio <sub>shoot</sub> | Root+IPU | Root-IPU | Log <sub>2</sub> Ratio <sub>root</sub> |                                                                         |
| 1            | Os01t0102900-01 | 32900     | 7220      | -2.19                                   | 643      | 1498     | -1.22                                  | Light regulated Lir1 family protein.                                    |
| 2            | Os11t0167800-01 | 26700     | 9540      | -1.48                                   | 10420    | 24654    | -1.24                                  | Similar to Anth (Pollen-specific desiccation-associated LLA23 protein). |
| 3            | Os02t0121300-01 | 24700     | 11300     | -1.12                                   | 16228    | 29999    | -0.89                                  | Cyclophilin 2.                                                          |
| 4            | Os07t0529600-01 | 24500     | 123       | -7.64                                   | 158      | 2646     | -4.07                                  | Similar to Thiazole biosynthetic enzyme 1-1, chloroplast precursor.     |
| 5            | Os01t0303000-02 | 24300     | 7950      | -1.61                                   | 39       | 151      | -1.95                                  | Similar to CP12.                                                        |
| 6            | Os01t0357100-02 | 17900     | 8680      | -1.05                                   | 4490     | 4331     | 0.05                                   | Similar to Ferredoxin-nitrite reductase.                                |
| 7            | Os10t0330000-01 | 12500     | 4210      | -1.57                                   | 9589     | 11058    | -0.21                                  | Conserved hypothetical protein.                                         |
| 8            | Os08t0468100-01 | 11600     | 5800      | -1                                      | 312      | 655      | -1.07                                  | Similar to Nitrate reductase.                                           |
| 9            | Os11t0147800-01 | 10900     | 5400      | -1.01                                   | 3472     | 3299     | 0.07                                   | Similar to Wali7 protein.                                               |
| 10           | Os02t0115700-01 | 8270      | 2780      | -1.57                                   | 725      | 1138     | -0.65                                  | Catalase isozyme A (CAT-A).                                             |

|    |                 |      |      |       |      |      |       |                                                                 |
|----|-----------------|------|------|-------|------|------|-------|-----------------------------------------------------------------|
| 11 | Os12t0115500-01 | 7910 | 3520 | -1.17 | 25   | 5    | 2.32  | Similar to nonspecific lipid-transfer protein 3.                |
| 12 | Os11t0644700-01 | 7790 | 1290 | -2.6  | 191  | 328  | -0.78 | Plant disease resistance response protein family protein.       |
| 13 | Os09t0541000-01 | 7580 | 1280 | -2.56 | 30   | 9    | 1.74  | Similar to Aquaporin 2.                                         |
| 14 | Os11t0645400-01 | 7230 | 1730 | -2.06 | 258  | 475  | -0.88 | Plant disease resistance response protein family protein.       |
| 15 | Os08t0139700-01 | 5800 | 2310 | -1.33 | 4    | 0    | Inf   | Similar to terpene synthase 6.                                  |
| 16 | Os01t0123900-01 | 5490 | 1990 | -1.46 | 5    | 5    | 0.00  | Similar to Bowman-Birk type proteinase inhibitor (EBI).         |
| 17 | Os04t0650700-02 | 5340 | 634  | -3.07 | 6491 | 786  | 3.05  | Similar to OSIGBa0113E10.3 protein.                             |
| 18 | Os12t0515800-01 | 5170 | 2330 | -1.15 | 1    | 0    | Inf   | Hypothetical conserved gene.                                    |
| 19 | Os08t0468100-03 | 4460 | 2120 | -1.07 | 290  | 554  | -0.93 | Similar to Nitrate reductase.                                   |
| 20 | Os02t0194700-01 | 3960 | 647  | -2.61 | 3    | 2    | 0.58  | Similar to Lipoxygenase 2.3, chloroplast precursor (LOX2:Hv:3). |
| 21 | Os07t0631900-01 | 3800 | 1740 | -1.12 | 61   | 133  | -1.12 | Nucleotide-binding, alpha-beta plait domain containing protein. |
| 22 | Os03t0197100-01 | 3520 | 1550 | -1.18 | 112  | 168  | -0.58 | Similar to Sugar transporter protein.                           |
| 23 | Os01t0191200-02 | 3190 | 382  | -3.06 | 198  | 138  | 0.52  | Similar to Acid phosphatase.                                    |
| 24 | Os11t0209000-01 | 3180 | 1430 | -1.15 | 7    | 0    | Inf   | Glycine rich family protein.                                    |
| 25 | Os03t0388900-01 | 2970 | 1260 | -1.24 | 48   | 80   | -0.74 | Peptidase C14, caspase catalytic domain containing protein.     |
| 26 | Os02t0704000-01 | 2730 | 259  | -3.4  | 7    | 14   | -1.00 | Carotenoid oxygenase family protein.                            |
| 27 | Os02t0308800-01 | 2610 | 799  | -1.71 | 0    | 0    | 0.00  | FAS1 domain domain containing protein.                          |
| 28 | Os06t0705100-02 | 2580 | 11.4 | -7.83 | 0    | 1    | -Inf  | Similar to Thylakoid lumenal 13.3 kDa protein (P16.5).          |
| 29 | Os05t0231700-01 | 2530 | 658  | -1.94 | 342  | 696  | -1.03 | Similar to Tonoplast intrinsic protein.                         |
| 30 | Os09t0530000-01 | 2500 | 1050 | -1.26 | 7    | 7    | 0.00  | Rhodanese-like domain containing protein.                       |
| 31 | Os03t0757900-01 | 2340 | 1070 | -1.13 | 1305 | 1947 | -0.58 | Similar to UDP-Glc dehydrogenase(UDPGDH).                       |
| 32 | Os11t0267000-03 | 2330 | 562  | -2.05 | 110  | 76   | 0.53  | GUN4-like domain containing protein.                            |
| 33 | Os04t0678700-01 | 2290 | 641  | -1.84 | 1    | 2    | -1.00 | Similar to NADPH- protochlorophyllide oxidoreductase (POR).     |
| 34 | Os08t0162800-01 | 2270 | 1100 | -1.04 | 1074 | 1990 | -0.89 | Similar to Acyl-CoA-binding protein.                            |
| 35 | Os03t0843800-00 | 2160 | 447  | -2.28 | 1    | 0    | Inf   | Methyl chloride transferase.                                    |
| 36 | Os08t0139100-01 | 2150 | 522  | -2.04 | 88   | 103  | -0.23 | Similar to DAG protein, chloroplast precursor.                  |
| 37 | Os07t0142900-01 | 2040 | 471  | -2.12 | 1    | 1    | 0.00  | Aldo/keto reductase family protein.                             |
| 38 | Os10t0529300-01 | 2020 | 975  | -1.05 | 637  | 633  | 0.01  | Similar to Tau class GST protein 3.                             |
| 39 | Os04t0439100-02 | 2010 | 980  | -1.03 | 266  | 67   | 1.99  | T-complex 11 family protein.                                    |
| 40 | Os07t0413800-04 | 2010 | 690  | -1.54 | 4    | 2    | 1.00  | Similar to predicted protein.                                   |

| Rank overall | Gene ID         | Root+IPU |          | Signature abundance                    |           |           |                                         | Description                                                         |
|--------------|-----------------|----------|----------|----------------------------------------|-----------|-----------|-----------------------------------------|---------------------------------------------------------------------|
|              |                 | Up       | Root-IPU | Log <sub>2</sub> Ratio <sub>root</sub> | Shoot+IPU | Shoot-IPU | Log <sub>2</sub> Ratio <sub>shoot</sub> |                                                                     |
| 1            | Os03t0305100-01 | 37244    | 16418    | 1.18                                   | 10800     | 2870      | 1.91                                    | Similar to AMP-binding protein.                                     |
| 2            | Os03t0826800-01 | 22837    | 9550     | 1.26                                   | 6190      | 518       | 3.58                                    | Conserved hypothetical protein.                                     |
| 3            | Os04t0468600-02 | 17591    | 7327     | 1.26                                   | 22.7      | 35.2      | -0.63                                   | Heavy metal transport/detoxification protein.                       |
| 4            | Os03t0734000-01 | 16438    | 7452     | 1.14                                   | 0         | 0.88      | -Inf                                    | Pentatricopeptide repeat containing protein.                        |
| 5            | Os06t0561000-01 | 10873    | 3384     | 1.68                                   | 29700     | 2020      | 3.88                                    | Similar to Myo-inositol oxygenase.                                  |
| 6            | Os03t0266300-03 | 9988     | 4018     | 1.31                                   | 13300     | 1920      | 2.79                                    | Class I low-molecular-weight heat shock protein 17.9.               |
| 7            | Os07t0638100-01 | 9548     | 4705     | 1.02                                   | 1590      | 525       | 1.60                                    | Six-bladed beta-propeller, TolB-like domain containing protein.     |
| 8            | Os02t0689900-01 | 8533     | 3598     | 1.25                                   | 2010      | 513       | 1.97                                    | TGF-beta receptor, type I/II extracellular region family protein.   |
| 9            | Os03t0231600-01 | 7266     | 2421     | 1.59                                   | 15800     | 1790      | 3.14                                    | Similar to Branched-chain-amino-acid aminotransferase 3.            |
| 10           | Os01t0975300-01 | 7249     | 3481     | 1.06                                   | 800       | 499       | 0.68                                    | Similar to Myb factor protein.                                      |
| 11           | Os10t0456800-01 | 6840     | 2374     | 1.53                                   | 8470      | 662       | 3.68                                    | Similar to PGPD14 protein.                                          |
| 12           | Os04t0650700-02 | 6491     | 786      | 3.05                                   | 634       | 5340      | -3.07                                   | Similar to OSIGBa0113E10.3 protein.                                 |
| 13           | Os06t0172800-00 | 6254     | 2545     | 1.30                                   | 13300     | 568       | 4.55                                    | Similar to alkaline alpha galactosidase 2.                          |
| 14           | Os02t0541325-00 | 5998     | 2428     | 1.30                                   | 7690      | 1380      | 2.48                                    | Similar to Serine decarboxylase.                                    |
| 15           | Os04t0482300-01 | 5793     | 2591     | 1.16                                   | 8340      | 846       | 3.30                                    | Kelch related domain containing protein.                            |
| 16           | Os03t0701200-01 | 5470     | 2309     | 1.24                                   | 18000     | 2360      | 2.93                                    | Similar to Sugar-starvation induced protein.                        |
| 17           | Os02t0586900-02 | 5311     | 1420     | 1.90                                   | 423       | 2.64      | 7.32                                    | Similar to Glycine rich protein.                                    |
| 18           | Os05t0171900-01 | 4584     | 1743     | 1.40                                   | 14000     | 1000      | 3.81                                    | Glyoxalase/bleomycin resistance protein.                            |
| 19           | Os06t0573600-01 | 4508     | 1317     | 1.78                                   | 4370      | 3310      | 0.40                                    | Similar to Beta-galactosidase precursor (Lactase).                  |
| 20           | Os02t0533800-01 | 4409     | 1818     | 1.28                                   | 2790      | 984       | 1.50                                    | Similar to ATPase inhibitor.                                        |
| 21           | Os01t0916100-01 | 4233     | 1982     | 1.09                                   | 60.2      | 30.8      | 0.97                                    | Similar to loricrin.                                                |
| 22           | Os01t0138800-01 | 4073     | 1278     | 1.67                                   | 506       | 25.5      | 4.31                                    | Peptidase C26 domain containing protein.                            |
| 23           | Os06t0194900-02 | 3834     | 947      | 2.02                                   | 1820      | 1180      | 0.63                                    | Sucrose synthase 2 (EC 2.4.1.13).                                   |
| 24           | Os02t0586000-01 | 3556     | 318      | 3.48                                   | 0         | 0         | 0.00                                    | Quinonprotein alcohol dehydrogenase-like domain containing protein. |
| 25           | Os03t0255500-01 | 3484     | 986      | 1.82                                   | 3080      | 2000      | 0.62                                    | Similar to Phosphoenolpyruvate carboxykinase 4.                     |
| 26           | Os06t0612800-02 | 3326     | 1103     | 1.59                                   | 987       | 585       | 0.75                                    | Similar to cDNA clone:006-301-C11, full insert sequence.            |
| 27           | Os10t0493600-01 | 3281     | 1277     | 1.36                                   | 5070      | 1980      | 1.36                                    | Alpha-galactosidase precursor.                                      |
| 28           | Os04t0659300-01 | 3147     | 854      | 1.88                                   | 4060      | 347       | 3.55                                    | Protein of unknown function DUF26 domain containing protein.        |



|    |                 |      |      |      |       |       |      |                                                                        |
|----|-----------------|------|------|------|-------|-------|------|------------------------------------------------------------------------|
| 29 | Os02t0585650-01 | 2885 | 484  | 2.58 | 0     | 0     | 0.00 | Hypothetical gene.                                                     |
| 30 | Os01t0194300-01 | 2752 | 1239 | 1.15 | 627   | 203   | 1.63 | Similar to NPR1.                                                       |
| 31 | Os03t0583800-01 | 2719 | 1297 | 1.07 | 12800 | 12300 | 0.05 | Mpv17/PMP22 family protein.                                            |
| 32 | Os03t0364400-02 | 2666 | 979  | 1.45 | 1420  | 272   | 2.39 | Similar to Phytosulfokine receptor-like protein.                       |
| 33 | Os01t0850700-02 | 2635 | 1027 | 1.36 | 11200 | 5140  | 1.12 | Cupredoxin domain containing protein.                                  |
| 34 | Os05t0405000-02 | 2568 | 499  | 2.36 | 3900  | 1080  | 1.85 | Similar to Isoform 2 of Pyruvate, phosphate dikinase 1, chloroplastic. |
| 35 | Os04t0670200-02 | 2504 | 566  | 2.15 | 767   | 304   | 1.34 | Granulin domain containing protein.                                    |
| 36 | Os03t0233000-01 | 2485 | 511  | 2.28 | 27.3  | 7.04  | 1.95 | Protein of unknown function DUF607 family protein.                     |
| 37 | Os03t0826900-01 | 2307 | 534  | 2.11 | 2480  | 27.3  | 6.51 | Conserved hypothetical protein.                                        |
| 38 | Os07t0638400-01 | 2203 | 964  | 1.19 | 54.6  | 7.92  | 2.78 | Similar to 1-Cys peroxiredoxin.                                        |
| 39 | Os10t0493600-03 | 2109 | 950  | 1.15 | 1880  | 1110  | 0.76 | Similar to Alpha-galactosidase.                                        |
| 40 | Os03t0351800-01 | 2028 | 999  | 1.02 | 1640  | 1100  | 0.57 | Zinc finger, RING/FYVE/PHD-type domain containing protein.             |

| Rank overall | Gene ID         | Root-IPU |          | Signature abundance                    |           |           |                                         | Description                                                         |
|--------------|-----------------|----------|----------|----------------------------------------|-----------|-----------|-----------------------------------------|---------------------------------------------------------------------|
|              |                 | Down     | Root+IPU | Log <sub>2</sub> Ratio <sub>root</sub> | Shoot+IPU | Shoot-IPU | Log <sub>2</sub> Ratio <sub>shoot</sub> |                                                                     |
| 1            | Os11t0167800-01 | 24654    | 10420    | -1.24                                  | 9540      | 26700     | -1.48                                   | Similar to Pollen-specific desiccation-associated LLA23 protein.    |
| 2            | Os05t0160300-01 | 9747     | 4260     | -1.19                                  | 971       | 1020      | -0.07                                   | Bifunctional inhibitor/plant lipid transfer protein.                |
| 3            | Os02t0669100-01 | 7048     | 2944     | -1.26                                  | 9180      | 6010      | 0.61                                    | Dehydrin family protein.                                            |
| 4            | Os11t0428800-01 | 5215     | 1657     | -1.65                                  | 0         | 0         | 0.00                                    | Cupredoxin domain containing protein.                               |
| 5            | Os12t0555000-01 | 3837     | 1680     | -1.19                                  | 11.4      | 15.8      | -0.48                                   | Similar to Probenazole-inducible protein PBZ1.                      |
| 6            | Os02t0716500-01 | 3763     | 1846     | -1.03                                  | 25800     | 15500     | 0.74                                    | Similar to Delta-12 fatty acid desaturase.                          |
| 7            | Os03t0332533-01 | 3557     | 1582     | -1.17                                  | 7.96      | 8.8       | -0.15                                   | Similar to Plant acid phosphatase family protein.                   |
| 8            | Os04t0403900-00 | 3328     | 1663     | -1.00                                  | 1300      | 2370      | -0.86                                   | Similar to H0502B11.1 protein.                                      |
| 9            | Os11t0247300-02 | 2963     | 719      | -2.04                                  | 795       | 679       | 0.23                                    | Similar to Alpha-tubulin.                                           |
| 10           | Os07t0529600-01 | 2646     | 158      | -4.07                                  | 123       | 24500     | -7.64                                   | Similar to Thiazole biosynthetic enzyme 1-1, chloroplast precursor. |
| 11           | Os03t0401300-03 | 2627     | 1044     | -1.33                                  | 0         | 86.2      | -Inf                                    | Similar to Sucrose synthase metabolism.                             |
| 12           | Os07t0175600-01 | 2490     | 1144     | -1.12                                  | 101       | 70.4      | 0.52                                    | Plant lipid transfer protein and hydrophobic protein.               |
| 13           | Os08t0157500-02 | 2349     | 353      | -2.73                                  | 641       | 1050      | -0.72                                   | Similar to Quercetin 3-O-methyltransferase 1.                       |
| 14           | Os04t0188500-01 | 2240     | 1012     | -1.15                                  | 0         | 0         | 0.00                                    | Conserved hypothetical protein.                                     |
| 15           | Os11t0507200-00 | 2189     | 951      | -1.20                                  | 21.6      | 29.9      | -0.47                                   | Similar to transferase.                                             |
| 16           | Os04t0507950-01 | 2151     | 979      | -1.14                                  | 2.27      | 6.16      | -1.44                                   | Hypothetical conserved gene.                                        |

|    |                 |      |     |       |      |       |       |                                                                        |
|----|-----------------|------|-----|-------|------|-------|-------|------------------------------------------------------------------------|
| 17 | Os08t0519100-02 | 2103 | 898 | -1.23 | 0    | 0     | 0.00  | Hypothetical conserved gene.                                           |
| 18 | Os03t0279200-01 | 2084 | 966 | -1.11 | 259  | 370   | -0.52 | Similar to Histone H2A.                                                |
| 19 | Os10t0569400-01 | 1930 | 927 | -1.06 | 14.8 | 164   | -3.47 | RIR1a protein precursor.                                               |
| 20 | Os04t0233400-02 | 1811 | 109 | -4.05 | 957  | 735   | 0.38  | Similar to cDNA clone:006-302-B10, full insert sequence.               |
| 21 | Os01t0916600-01 | 1773 | 683 | -1.38 | 33   | 647   | -4.29 | RNA recognition motif, glycine rich protein domain containing protein. |
| 22 | Os02t0653200-01 | 1675 | 715 | -1.23 | 12.5 | 17.6  | -0.49 | Cupredoxin domain containing protein.                                  |
| 23 | Os01t0559900-01 | 1578 | 746 | -1.08 | 899  | 1460  | -0.70 | Non-protein coding transcript.                                         |
| 24 | Os01t0974200-02 | 1567 | 780 | -1.01 | 806  | 1300  | -0.69 | Metallothionein-like protein.                                          |
| 25 | Os01t0975900-02 | 1538 | 485 | -1.66 | 184  | 662   | -1.84 | Similar to Tonoplast membrane integral protein ZmTIP1-2.               |
| 26 | Os01t0102900-01 | 1498 | 643 | -1.22 | 7220 | 32900 | -2.19 | Light regulated Lir1 family protein.                                   |
| 27 | Os07t0174400-00 | 1437 | 657 | -1.13 | 0    | 7.04  | -Inf  | Similar to Non-specific lipid-transfer protein.                        |
| 28 | Os03t0242300-01 | 1431 | 294 | -2.28 | 580  | 1020  | -0.81 | Hypothetical protein.                                                  |
| 29 | Os11t0211800-01 | 1387 | 606 | -1.19 | 30.7 | 193   | -2.65 | Similar to Specific abundant protein-like protein 1.                   |
| 30 | Os08t0249000-01 | 1372 | 385 | -1.83 | 348  | 594   | -0.77 | Zinc finger, B-box domain containing protein.                          |
| 31 | Os11t0180000-01 | 1339 | 574 | -1.22 | 53.4 | 79.2  | -0.57 | Plant disease resistance response protein family protein.              |
| 32 | Os09t0482200-01 | 1338 | 460 | -1.54 | 306  | 364   | -0.25 | Peptidase A1 domain containing protein.                                |
| 33 | Os09t0482500-01 | 1338 | 460 | -1.54 | 306  | 364   | -0.25 | Peptidase A1 domain containing protein.                                |
| 34 | Os05t0207300-01 | 1334 | 649 | -1.04 | 347  | 508   | -0.55 | Similar to 60S ribosomal protein L11-2 (L16). Splice isoform 2.        |
| 35 | Os01t0962600-01 | 1240 | 572 | -1.12 | 78.4 | 159   | -1.02 | Similar to 40S ribosomal protein S10-1.                                |
| 36 | Os03t0155300-00 | 1239 | 472 | -1.39 | 0    | 0     | 0.00  | Similar to Alpha-expansin precursor.                                   |
| 37 | Os08t0524400-00 | 1225 | 609 | -1.01 | 18.2 | 15.8  | 0.20  | Protein of unknown function DUF568.                                    |
| 38 | Os01t0756900-01 | 1224 | 552 | -1.15 | 26.1 | 43.1  | -0.72 | Hypothetical protein.                                                  |
| 39 | Os01t0797600-01 | 1209 | 477 | -1.34 | 2920 | 2670  | 0.13  | AP2/ERF family protein.                                                |
| 40 | Os02t0716500-04 | 1184 | 426 | -1.47 | 6320 | 4270  | 0.57  | Similar to Delta-12 fatty acid desaturase.                             |

**ESI Table S8.**

Significantly enriched gene ontology (GO) terms in shoot/root-IPU and shoot/root+IPU libraries of rice. GO terms including three ontologies: biological process, cellular component and molecular function with corrected *P*-value < 0.01, indicate significantly enriched in differentially expressed genes (DEGs).

| GO_term                                  | Cluster frequency      | Genome frequency of use | Corrected <i>P</i> -value |
|------------------------------------------|------------------------|-------------------------|---------------------------|
|                                          | Shoot+IPU vs Shoot-IPU |                         |                           |
| <b>Biological process</b>                | DEGs(1016)             | Genes(20886)            |                           |
| oxidation-reduction process              | 11.52%(117,66↑,51↓)    | 7.83%(1636)             | 8.88E-06                  |
| carbohydrate metabolic process           | 4.82%(49,37↑,12↓)      | 2.88%(602)              | 1.67E-04                  |
| transmembrane transport                  | 4.53%(46,21↑,25↓)      | 3.16%(660)              | 5.92E-03                  |
| signal transduction                      | 1.77%(18,10↑,?8↓)      | 0.88%(184)              | 1.64E-03                  |
| response to stress                       | 1.38%(14,13↑,1↓)       | 0.44%(92)               | 3.55E-05                  |
| cellulose biosynthetic process           | 0.79%(8,4↑,4↓)         | 0.29%(60)               | 2.33E-03                  |
| amino acid transmembrane transport       | 0.69%(7,3↑,4↓)         | 0.16%(34)               | 1.79E-04                  |
| thiamine biosynthetic process            | 0.49%(5,0↑,5↓)         | 0.04%(8)                | 3.36E-07                  |
| cellular glucan metabolic process        | 0.39%(4,3↑,1↓)         | 0.13%(27)               | 8.91E-03                  |
| protein refolding                        | 0.39%(4,2↑,2↓)         | 0.07%(15)               | 5.38E-04                  |
| 1,3-beta-D-glucan biosynthetic process   | 0.30%(3,1↑,2↓)         | 0.08%(16)               | 6.33E-03                  |
| response to wounding                     | 0.30%(3,3↑,0↓)         | 0.05%(10)               | 9.23E-04                  |
| glutamate biosynthetic process           | 0.20%(2,1↑,1↓)         | 0.02%(4)                | 4.42E-04                  |
| glutamine metabolic process              | 0.20%(2,1↑,1↓)         | 0.04%(9)                | 7.73E-03                  |
| mannose metabolic process                | 0.20%(2,0↑,2↓)         | 0.03%(7)                | 3.47E-03                  |
| methionine biosynthetic process          | 0.20%(2,0↑,2↓)         | 0.04%(8)                | 5.35E-03                  |
| response to water                        | 0.20%(2,2↑,0↓)         | 0.03%(7)                | 3.47E-03                  |
| sphingolipid metabolic process           | 0.20%(2,0↑,2↓)         | 0.04%(9)                | 7.73E-03                  |
| acyl-CoA metabolic process               | 0.10%(1,1↑,0↓)         | 0.01%(2)                | 2.36E-03                  |
| asparagine biosynthetic process          | 0.10%(1,1↑,0↓)         | 0.01%(3)                | 6.86E-03                  |
| bacteriochlorophyll biosynthetic process | 0.10%(1,0↑,1↓)         | 0.01%(3)                | 6.86E-03                  |
| cellular homeostasis                     | 0.10%(1,0↑,1↓)         | 0.01%(3)                | 6.86E-03                  |
| ceramide metabolic process               | 0.10%(1,1↑,0↓)         | 0.01%(3)                | 6.86E-03                  |
| fatty-acyl-CoA biosynthetic process      | 0.10%(1,1↑,0↓)         | 0.00%(1)                | 0.00E+00                  |
| glyoxylate cycle                         | 0.10%(1,1↑,0↓)         | 0.00%(1)                | 0.00E+00                  |
| heme oxidation                           | 0.10%(1,0↑,1↓)         | 0.01%(3)                | 6.86E-03                  |
| inositol catabolic process               | 0.10%(1,1↑,0↓)         | 0.00%(1)                | 0.00E+00                  |
| lysyl-tRNA aminoacylation                | 0.10%(1,0↑,1↓)         | 0.01%(2)                | 2.36E-03                  |
| nitrate assimilation                     | 0.10%(1,0↑,1↓)         | 0.01%(3)                | 6.86E-03                  |
| pathogenesis                             | 0.10%(1,0↑,1↓)         | 0.00%(1)                | 0.00E+00                  |
| proline catabolic process                | 0.10%(1,1↑,0↓)         | 0.00%(1)                | 0.00E+00                  |
| pyrimidine base catabolic process        | 0.10%(1,1↑,0↓)         | 0.01%(2)                | 2.36E-03                  |
| RNA splicing                             | 0.10%(1,1↑,0↓)         | 0.01%(3)                | 6.86E-03                  |
| tRNA wobble uridine modification         | 0.10%(1,1↑,0↓)         | 0.01%(2)                | 2.36E-03                  |
| tyrosine metabolic process               | 0.10%(1,1↑,0↓)         | 0.01%(2)                | 2.36E-03                  |

|                                                                                                                               |                     |              |          |
|-------------------------------------------------------------------------------------------------------------------------------|---------------------|--------------|----------|
| vesicle docking                                                                                                               | 0.10%(1,0↑,1↓)      | 0.01%(2)     | 2.36E-03 |
| <b>Cellular component</b>                                                                                                     | DEGs(1016)          | Genes(20886) |          |
| membrane                                                                                                                      | 8.46%(86,35↑,51↓)   | 6.66%(1390)  | 9.06E-03 |
| 1,3-beta-D-glucan synthase complex                                                                                            | 0.30%(3,1↑,2↓)      | 0.08%(16)    | 6.33E-03 |
| COPI vesicle coat                                                                                                             | 0.30%(3,1↑,2↓)      | 0.07%(15)    | 4.94E-03 |
| protein phosphatase type 2A complex                                                                                           | 0.30%(3,2↑,1↓)      | 0.09%(18)    | 9.86E-03 |
| microtubule associated complex                                                                                                | 0.20%(2,2↑,0↓)      | 0.04%(8)     | 5.35E-03 |
| phosphopyruvate hydratase complex                                                                                             | 0.20%(2,0↑,2↓)      | 0.04%(8)     | 5.35E-03 |
| Golgi apparatus                                                                                                               | 0.10%(1,1↑,0↓)      | 0.01%(3)     | 6.86E-03 |
| Golgi apparatus part                                                                                                          | 0.10%(1,1↑,0↓)      | 0.01%(3)     | 6.86E-03 |
| molybdopterin synthase complex                                                                                                | 0.10%(1,0↑,1↓)      | 0.01%(3)     | 6.86E-03 |
| transcription factor TFIIE complex                                                                                            | 0.10%(1,0↑,1↓)      | 0.01%(3)     | 6.86E-03 |
| <b>Molecular function</b>                                                                                                     | DEGs(1016)          | Genes(20886) |          |
| catalytic activity                                                                                                            | 11.42%(116,80↑,36↓) | 8.12%(1696)  | 6.83E-05 |
| oxidoreductase activity                                                                                                       | 5.91%(60,39↑,21↓)   | 4.20%(878)   | 3.28E-03 |
| hydrolase activity, hydrolyzing O-glycosyl compounds                                                                          | 3.25%(33,25↑,8↓)    | 1.72%(360)   | 1.79E-04 |
| cation binding                                                                                                                | 3.05%(31,24↑,7↓)    | 1.38%(289)   | 1.31E-05 |
| metal ion binding                                                                                                             | 2.95%(30,14↑,16↓)   | 1.54%(321)   | 2.30E-04 |
| flavin adenine dinucleotide binding                                                                                           | 1.48%(15,11↑,4↓)    | 0.79%(166)   | 7.13E-03 |
| magnesium ion binding                                                                                                         | 1.38%(14,7↑,7↓)     | 0.70%(146)   | 5.06E-03 |
| nutrient reservoir activity                                                                                                   | 0.79%(8,8↑,0↓)      | 0.35%(73)    | 8.74E-03 |
| amino acid transmembrane transporter activity                                                                                 | 0.69%(7,3↑,4↓)      | 0.16%(34)    | 1.79E-04 |
| cellulose synthase (UDP-forming) activity                                                                                     | 0.69%(7,3↑,4↓)      | 0.27%(56)    | 5.44E-03 |
| ligase activity                                                                                                               | 0.59%(6,5↑,1↓)      | 0.17%(36)    | 1.53E-03 |
| serine-type endopeptidase inhibitor activity                                                                                  | 0.59%(6,5↑,1↓)      | 0.22%(46)    | 6.42E-03 |
| lipoxygenase activity                                                                                                         | 0.49%(5,1↑,4↓)      | 0.09%(18)    | 1.46E-04 |
| oxidoreductase activity, acting on single donors with incorporation of molecular oxygen, incorporation of two atoms of oxygen | 0.49%(5,1↑,4↓)      | 0.11%(24)    | 8.25E-04 |
| thiamine pyrophosphate binding                                                                                                | 0.49%(5,4↑,1↓)      | 0.08%(17)    | 1.02E-04 |
| transaminase activity                                                                                                         | 0.49%(5,4↑,1↓)      | 0.15%(32)    | 3.99E-03 |
| xyloglucan:xyloglucosyl transferase activity                                                                                  | 0.39%(4,3↑,1↓)      | 0.13%(27)    | 8.91E-03 |
| 1,3-beta-D-glucan synthase activity                                                                                           | 0.30%(3,1↑,2↓)      | 0.08%(16)    | 6.33E-03 |
| acyl-CoA dehydrogenase activity                                                                                               | 0.30%(3,3↑,0↓)      | 0.05%(11)    | 1.40E-03 |
| antioxidant activity                                                                                                          | 0.30%(3,3↑,0↓)      | 0.08%(16)    | 6.33E-03 |
| oxidoreductase activity, acting on the aldehyde or oxo group of donors, disulfide as acceptor                                 | 0.30%(3,3↑,0↓)      | 0.07%(15)    | 4.94E-03 |

|                                                                                        |                |           |          |
|----------------------------------------------------------------------------------------|----------------|-----------|----------|
| oxidoreductase activity, acting on the CH-NH2 group of donors, NAD or NADP as acceptor | 0.30%(3,2↑,1↓) | 0.02%(5)  | 2.68E-05 |
| oxoglutarate dehydrogenase (succinyl-transferring) activity                            | 0.30%(3,2↑,1↓) | 0.03%(6)  | 7.72E-05 |
| potassium ion binding                                                                  | 0.30%(3,2↑,1↓) | 0.09%(18) | 9.86E-03 |
| protein phosphatase type 2A regulator activity                                         | 0.30%(3,2↑,1↓) | 0.09%(18) | 9.86E-03 |
| pyruvate kinase activity                                                               | 0.30%(3,2↑,1↓) | 0.09%(18) | 9.86E-03 |
| transcription cofactor activity                                                        | 0.30%(3,2↑,1↓) | 0.07%(15) | 4.94E-03 |
| 3-deoxy-7-phosphoheptulonate synthase activity                                         | 0.20%(2,1↑,1↓) | 0.03%(6)  | 2.05E-03 |
| biotin carboxylase activity                                                            | 0.20%(2,2↑,0↓) | 0.01%(3)  | 1.15E-04 |
| CTP synthase activity                                                                  | 0.20%(2,2↑,0↓) | 0.04%(9)  | 7.73E-03 |
| diphosphate-fructose-6-phosphate 1-phosphotransferase activity                         | 0.20%(2,1↑,1↓) | 0.03%(6)  | 2.05E-03 |
| folic acid binding                                                                     | 0.20%(2,0↑,2↓) | 0.02%(4)  | 4.42E-04 |
| glucose-6-phosphate dehydrogenase activity                                             | 0.20%(2,0↑,2↓) | 0.04%(9)  | 7.73E-03 |
| glucosylceramidase activity                                                            | 0.20%(2,0↑,2↓) | 0.03%(7)  | 3.47E-03 |
| mannosidase activity                                                                   | 0.20%(2,0↑,2↓) | 0.03%(7)  | 3.47E-03 |
| phosphopyruvate hydratase activity                                                     | 0.20%(2,0↑,2↓) | 0.04%(8)  | 5.35E-03 |
| phosphotransferase activity, for other substituted phosphate groups                    | 0.20%(2,0↑,2↓) | 0.04%(9)  | 7.73E-03 |
| shikimate kinase activity                                                              | 0.20%(2,2↑,0↓) | 0.04%(8)  | 5.35E-03 |
| 4-hydroxyphenylpyruvate dioxygenase activity                                           | 0.10%(1,1↑,0↓) | 0.00%(1)  | 0.00E+00 |
| acyl-CoA thioesterase activity                                                         | 0.10%(1,1↑,0↓) | 0.01%(2)  | 2.36E-03 |
| adenosylhomocysteinase activity                                                        | 0.10%(1,0↑,1↓) | 0.01%(2)  | 2.36E-03 |
| aldehyde-lyase activity                                                                | 0.10%(1,0↑,1↓) | 0.01%(2)  | 2.36E-03 |
| anthranilate synthase activity                                                         | 0.10%(1,1↑,0↓) | 0.01%(3)  | 6.86E-03 |
| asparagine synthase (glutamine-hydrolyzing) activity                                   | 0.10%(1,1↑,0↓) | 0.01%(3)  | 6.86E-03 |
| carotene 7,8-desaturase activity                                                       | 0.10%(1,1↑,0↓) | 0.01%(2)  | 2.36E-03 |
| CDP-diacylglycerol-glycerol-3-phosphate 3-phosphatidyltransferase activity             | 0.10%(1,0↑,1↓) | 0.01%(2)  | 2.36E-03 |
| dihydrolipoyllysine-residue (2-methylpropanoyl)transferase activity                    | 0.10%(1,1↑,0↓) | 0.00%(1)  | 0.00E+00 |
| formate-tetrahydrofolate ligase activity                                               | 0.10%(1,0↑,1↓) | 0.01%(2)  | 2.36E-03 |
| gamma-glutamyltransferase activity                                                     | 0.10%(1,0↑,1↓) | 0.01%(3)  | 6.86E-03 |
| glutamate-1-semialdehyde 2,1-aminomutase activity                                      | 0.10%(1,0↑,1↓) | 0.01%(2)  | 2.36E-03 |
| glycerol kinase activity                                                               | 0.10%(1,1↑,0↓) | 0.01%(2)  | 2.36E-03 |
| glycerone kinase activity                                                              | 0.10%(1,0↑,1↓) | 0.01%(2)  | 2.36E-03 |

|                                                                                                        |                |          |          |
|--------------------------------------------------------------------------------------------------------|----------------|----------|----------|
| heme oxygenase (decyclizing) activity                                                                  | 0.10%(1,0↑,1↓) | 0.01%(3) | 6.86E-03 |
| homogentisate 1,2-dioxygenase activity                                                                 | 0.10%(1,1↑,0↓) | 0.01%(2) | 2.36E-03 |
| inositol oxygenase activity                                                                            | 0.10%(1,1↑,0↓) | 0.00%(1) | 0.00E+00 |
| ion channel inhibitor activity                                                                         | 0.10%(1,0↑,1↓) | 0.00%(1) | 0.00E+00 |
| isocitrate lyase activity                                                                              | 0.10%(1,1↑,0↓) | 0.00%(1) | 0.00E+00 |
| isopentenyl-diphosphate delta-isomerase activity                                                       | 0.10%(1,0↑,1↓) | 0.01%(3) | 6.86E-03 |
| L-lactate dehydrogenase activity                                                                       | 0.10%(1,1↑,0↓) | 0.01%(3) | 6.86E-03 |
| lysine-tRNA ligase activity                                                                            | 0.10%(1,0↑,1↓) | 0.01%(2) | 2.36E-03 |
| malate dehydrogenase (NADP+) activity                                                                  | 0.10%(1,1↑,0↓) | 0.01%(2) | 2.36E-03 |
| malate synthase activity                                                                               | 0.10%(1,1↑,0↓) | 0.00%(1) | 0.00E+00 |
| oxidoreductase activity, acting on other nitrogenous compounds as donors, with NAD or NADP as acceptor | 0.10%(1,0↑,1↓) | 0.01%(3) | 6.86E-03 |
| oxidoreductase activity, acting on single donors with incorporation of molecular oxygen                | 0.10%(1,1↑,0↓) | 0.01%(3) | 6.86E-03 |
| peroxiredoxin activity                                                                                 | 0.10%(1,1↑,0↓) | 0.01%(3) | 6.86E-03 |
| phosphoribosyl-AMP cyclohydrolase activity                                                             | 0.10%(1,0↑,1↓) | 0.01%(2) | 2.36E-03 |
| phosphoribosyl-ATP diphosphatase activity                                                              | 0.10%(1,0↑,1↓) | 0.01%(2) | 2.36E-03 |
| phosphoribosylformylglycinamide synthase activity                                                      | 0.10%(1,0↑,1↓) | 0.01%(2) | 2.36E-03 |
| proline dehydrogenase activity                                                                         | 0.10%(1,1↑,0↓) | 0.00%(1) | 0.00E+00 |
| protein methyltransferase activity                                                                     | 0.10%(1,0↑,1↓) | 0.01%(3) | 6.86E-03 |
| protochlorophyllide reductase activity                                                                 | 0.10%(1,0↑,1↓) | 0.00%(1) | 0.00E+00 |
| pyruvate, phosphate dikinase activity                                                                  | 0.10%(1,1↑,0↓) | 0.01%(2) | 2.36E-03 |
| S-methyl-5-thioribose kinase activity                                                                  | 0.10%(1,0↑,1↓) | 0.01%(2) | 2.36E-03 |
| sulfurtransferase activity                                                                             | 0.10%(1,0↑,1↓) | 0.01%(2) | 2.36E-03 |

#### Root+IPU vs Root-IPU

| <b>Biological process</b>                                | DEGs(867)          | Genes(20886) | Corrected <i>P</i> -value |
|----------------------------------------------------------|--------------------|--------------|---------------------------|
| oxidation-reduction process                              | 10.61%(92,46↑,46↓) | 7.83%(1636)  | 1.17E-03                  |
| metabolic process                                        | 8.42%(73,47↑,26↓)  | 6.33%(1323)  | 5.43E-03                  |
| carbohydrate metabolic process                           | 4.73%(41,20↑,21↓)  | 2.88%(602)   | 7.55E-04                  |
| lipid transport                                          | 1.38%(12,2↑,10↓)   | 0.52%(108)   | 5.36E-04                  |
| cellulose biosynthetic process                           | 1.27%(11,3↑,8↓)    | 0.29%(60)    | 5.40E-06                  |
| oligopeptide transport                                   | 1.27%(11,7↑,4↓)    | 0.48%(101)   | 9.73E-04                  |
| glycolysis                                               | 1.04%(9,2↑,7↓)     | 0.37%(77)    | 1.27E-03                  |
| phosphorylation                                          | 0.69%(6,4↑,2↓)     | 0.15%(32)    | 2.81E-04                  |
| amine metabolic process                                  | 0.58%(5,1↑,4↓)     | 0.10%(21)    | 1.60E-04                  |
| transcription initiation from RNA polymerase II promoter | 0.46%(4,2↑,2↓)     | 0.09%(19)    | 8.71E-04                  |
| phosphatidylcholine metabolic process                    | 0.35%(3,3↑,0↓)     | 0.05%(11)    | 7.70E-04                  |

|                                                                     |                     |                     |          |
|---------------------------------------------------------------------|---------------------|---------------------|----------|
| tetrapyrrole biosynthetic process                                   | 0.35%(3,3↑,0↓)      | 0.04%(9)            | 3.14E-04 |
| thiamine biosynthetic process                                       | 0.35%(3,0↑,3↓)      | 0.04%(8)            | 1.81E-04 |
| cellular biosynthetic process                                       | 0.23%(2,1↑,1↓)      | 0.04%(9)            | 4.96E-03 |
| gluconeogenesis                                                     | 0.23%(2,2↑,0↓)      | 0.04%(8)            | 3.41E-03 |
| glutamine metabolic process                                         | 0.23%(2,2↑,0↓)      | 0.04%(9)            | 4.96E-03 |
| glycolipid transport                                                | 0.23%(2,1↑,1↓)      | 0.04%(8)            | 3.41E-03 |
| hexose metabolic process                                            | 0.23%(2,1↑,1↓)      | 0.03%(6)            | 1.30E-03 |
| mature ribosome assembly                                            | 0.23%(2,1↑,1↓)      | 0.01%(3)            | 7.13E-05 |
| nitrate assimilation                                                | 0.23%(2,0↑,2↓)      | 0.01%(3)            | 7.13E-05 |
| nuclear mRNA splicing, via spliceosome                              | 0.23%(2,1↑,1↓)      | 0.05%(10)           | 6.87E-03 |
| chromosome organization                                             | 0.12%(1,1↑,0↓)      | 0.02%(4)            | 9.77E-03 |
| deoxyribonucleoside diphosphate metabolic process                   | 0.12%(1,0↑,1↓)      | 0.01%(2)            | 1.72E-03 |
| fatty-acyl-CoA biosynthetic process                                 | 0.12%(1,1↑,0↓)      | 0.00%(1)            | 0.00E+00 |
| glyoxylate cycle                                                    | 0.12%(1,1↑,0↓)      | 0.00%(1)            | 0.00E+00 |
| heme oxidation                                                      | 0.12%(1,0↑,1↓)      | 0.01%(3)            | 5.02E-03 |
| inositol catabolic process                                          | 0.12%(1,1↑,0↓)      | 0.00%(1)            | 0.00E+00 |
| molybdopterin cofactor biosynthetic process                         | 0.12%(1,1↑,0↓)      | 0.01%(2)            | 1.72E-03 |
| negative regulation of apoptosis                                    | 0.12%(1,0↑,1↓)      | 0.01%(2)            | 1.72E-03 |
| nuclear-transcribed mRNA catabolic process, nonsense-mediated decay | 0.12%(1,1↑,0↓)      | 0.00%(1)            | 0.00E+00 |
| pantothenate biosynthetic process                                   | 0.12%(1,1↑,0↓)      | 0.02%(4)            | 9.77E-03 |
| pathogenesis                                                        | 0.12%(1,0↑,1↓)      | 0.00%(1)            | 0.00E+00 |
| prolyl-tRNA aminoacylation                                          | 0.12%(1,0↑,1↓)      | 0.02%(4)            | 9.77E-03 |
| pyrimidine base catabolic process                                   | 0.12%(1,1↑,0↓)      | 0.01%(2)            | 1.72E-03 |
| transcription termination, DNA-dependent                            | 0.12%(1,1↑,0↓)      | 0.01%(3)            | 5.02E-03 |
| tyrosine metabolic process                                          | 0.12%(1,1↑,0↓)      | 0.01%(2)            | 1.72E-03 |
| <b>Cellular component</b>                                           | <b>DEGs(867)</b>    | <b>Genes(20886)</b> |          |
| membrane                                                            | 9.69%(84,39↑,45↓)   | 6.66%(1390)         | 2.07E-04 |
| clathrin adaptor complex                                            | 0.35%(3,1↑,2↓)      | 0.10%(20)           | 8.39E-03 |
| intrinsic to endoplasmic reticulum membrane                         | 0.35%(3,1↑,2↓)      | 0.09%(19)           | 6.94E-03 |
| outer membrane                                                      | 0.23%(2,2↑,0↓)      | 0.05%(10)           | 6.87E-03 |
| transcription factor TFIIE complex                                  | 0.23%(2,1↑,1↓)      | 0.01%(3)            | 7.13E-05 |
| eukaryotic translation initiation factor 3 complex                  | 0.12%(1,1↑,0↓)      | 0.01%(2)            | 1.72E-03 |
| Golgi apparatus                                                     | 0.12%(1,0↑,1↓)      | 0.01%(3)            | 5.02E-03 |
| Golgi apparatus part                                                | 0.12%(1,0↑,1↓)      | 0.01%(3)            | 5.02E-03 |
| signal recognition particle receptor complex                        | 0.12%(1,0↑,1↓)      | 0.01%(2)            | 1.72E-03 |
| <b>Molecular function</b>                                           | <b>DEGs(867)</b>    | <b>Genes(20886)</b> |          |
| catalytic activity                                                  | 12.69%(110,67↑,43↓) | 8.12%(1696)         | 9.44E-07 |

|                                                                                                        |                   |            |          |
|--------------------------------------------------------------------------------------------------------|-------------------|------------|----------|
| cation binding                                                                                         | 2.31%(20,10↑,10↓) | 1.38%(289) | 9.52E-03 |
| pyridoxal phosphate binding                                                                            | 1.85%(16,13↑,3↓)  | 0.76%(159) | 3.39E-04 |
| flavin adenine dinucleotide binding                                                                    | 1.73%(15,9↑,6↓)   | 0.79%(166) | 1.53E-03 |
| copper ion binding                                                                                     | 1.61%(14,3↑,11↓)  | 0.69%(145) | 1.04E-03 |
| cellulose synthase (UDP-forming) activity                                                              | 1.27%(11,3↑,8↓)   | 0.27%(56)  | 2.51E-06 |
| kinase activity                                                                                        | 0.81%(7,6↑,1↓)    | 0.20%(41)  | 2.41E-04 |
| potassium ion binding                                                                                  | 0.81%(7,2↑,5↓)    | 0.09%(18)  | 2.58E-07 |
| pyruvate kinase activity                                                                               | 0.81%(7,2↑,5↓)    | 0.09%(18)  | 2.58E-07 |
| transaminase activity                                                                                  | 0.81%(7,6↑,1↓)    | 0.15%(32)  | 3.69E-05 |
| lipid binding                                                                                          | 0.69%(6,1↑,5↓)    | 0.15%(31)  | 2.27E-04 |
| cofactor binding                                                                                       | 0.58%(5,4↑,1↓)    | 0.18%(37)  | 3.89E-03 |
| primary amine oxidase activity                                                                         | 0.58%(5,1↑,4↓)    | 0.06%(13)  | 6.72E-06 |
| quinone binding                                                                                        | 0.58%(5,1↑,4↓)    | 0.13%(28)  | 8.65E-04 |
| oxidoreductase activity, acting on the CH-CH group of donors                                           | 0.46%(4,3↑,1↓)    | 0.13%(27)  | 4.59E-03 |
| acyl-CoA dehydrogenase activity                                                                        | 0.35%(3,3↑,0↓)    | 0.05%(11)  | 7.70E-04 |
| molybdenum ion binding                                                                                 | 0.35%(3,0↑,3↓)    | 0.06%(12)  | 1.12E-03 |
| oxidoreductase activity, acting on NADH or NADPH                                                       | 0.35%(3,1↑,2↓)    | 0.07%(14)  | 2.11E-03 |
| phospholipase D activity                                                                               | 0.35%(3,3↑,0↓)    | 0.05%(11)  | 7.70E-04 |
| protein-disulfide reductase activity                                                                   | 0.35%(3,1↑,2↓)    | 0.05%(10)  | 5.07E-04 |
| sucrose synthase activity                                                                              | 0.35%(3,2↑,1↓)    | 0.06%(13)  | 1.56E-03 |
| alpha-amylase activity                                                                                 | 0.23%(2,1↑,1↓)    | 0.05%(10)  | 6.87E-03 |
| dolichyl-diphosphooligosaccharide-protein glycotransferase activity                                    | 0.23%(2,1↑,1↓)    | 0.03%(7)   | 2.20E-03 |
| glycolipid binding                                                                                     | 0.23%(2,1↑,1↓)    | 0.04%(8)   | 3.41E-03 |
| glycolipid transporter activity                                                                        | 0.23%(2,1↑,1↓)    | 0.04%(8)   | 3.41E-03 |
| guanyl nucleotide binding                                                                              | 0.23%(2,0↑,2↓)    | 0.05%(10)  | 6.87E-03 |
| hydrogen-translocating pyrophosphatase activity                                                        | 0.23%(2,2↑,0↓)    | 0.04%(9)   | 4.96E-03 |
| oxidoreductase activity, acting on other nitrogenous compounds as donors, with NAD or NADP as acceptor | 0.23%(2,0↑,2↓)    | 0.01%(3)   | 7.13E-05 |
| peptide-methionine-(S)-S-oxide reductase activity                                                      | 0.23%(2,1↑,1↓)    | 0.02%(5)   | 6.69E-04 |
| phosphoenolpyruvate carboxykinase activity                                                             | 0.23%(2,2↑,0↓)    | 0.02%(4)   | 2.76E-04 |
| phosphoenolpyruvate carboxykinase (ATP) activity                                                       | 0.23%(2,2↑,0↓)    | 0.02%(4)   | 2.76E-04 |
| phosphoribulokinase activity                                                                           | 0.23%(2,2↑,0↓)    | 0.02%(4)   | 2.76E-04 |
| purine nucleotide binding                                                                              | 0.23%(2,2↑,0↓)    | 0.02%(4)   | 2.76E-04 |
| ribosome binding                                                                                       | 0.23%(2,1↑,1↓)    | 0.04%(8)   | 3.41E-03 |
| transcription coactivator activity                                                                     | 0.23%(2,0↑,2↓)    | 0.02%(4)   | 2.76E-04 |



|                                                                                         |                |          |          |
|-----------------------------------------------------------------------------------------|----------------|----------|----------|
| 3-dehydroquinate dehydratase activity                                                   | 0.12%(1,0↑,1↓) | 0.02%(4) | 9.77E-03 |
| 4-hydroxyphenylpyruvate dioxygenase activity                                            | 0.12%(1,1↑,0↓) | 0.00%(1) | 0.00E+00 |
| 5'-3' exoribonuclease activity                                                          | 0.12%(1,1↑,0↓) | 0.01%(3) | 5.02E-03 |
| adenosylhomocysteinase activity                                                         | 0.12%(1,0↑,1↓) | 0.01%(2) | 1.72E-03 |
| aldehyde-lyase activity                                                                 | 0.12%(1,1↑,0↓) | 0.01%(2) | 1.72E-03 |
| aminomethyltransferase activity                                                         | 0.12%(1,0↑,1↓) | 0.01%(3) | 5.02E-03 |
| anthranilate synthase activity                                                          | 0.12%(1,0↑,1↓) | 0.01%(3) | 5.02E-03 |
| biotin carboxylase activity                                                             | 0.12%(1,1↑,0↓) | 0.01%(3) | 5.02E-03 |
| CDP-diacylglycerol-glycerol-3-phosphate 3-phosphatidyltransferase activity              | 0.12%(1,1↑,0↓) | 0.01%(2) | 1.72E-03 |
| dihydrolipoyllysine-residue (2-methylpropanoyl)transferase activity                     | 0.12%(1,1↑,0↓) | 0.00%(1) | 0.00E+00 |
| dihydroxy-acid dehydratase activity                                                     | 0.12%(1,1↑,0↓) | 0.01%(2) | 1.72E-03 |
| ferredoxin-NAD(P) reductase activity                                                    | 0.12%(1,0↑,1↓) | 0.02%(4) | 9.77E-03 |
| folic acid binding                                                                      | 0.12%(1,1↑,0↓) | 0.02%(4) | 9.77E-03 |
| glutamate-1-semialdehyde 2,1-aminomutase activity                                       | 0.12%(1,1↑,0↓) | 0.01%(2) | 1.72E-03 |
| glutamyl-tRNA reductase activity                                                        | 0.12%(1,1↑,0↓) | 0.01%(2) | 1.72E-03 |
| heme oxygenase (decyclizing) activity                                                   | 0.12%(1,0↑,1↓) | 0.01%(3) | 5.02E-03 |
| homogentisate 1,2-dioxygenase activity                                                  | 0.12%(1,1↑,0↓) | 0.01%(2) | 1.72E-03 |
| hydrolase activity, acting on carbon-nitrogen (but not peptide) bonds, in cyclic amides | 0.12%(1,1↑,0↓) | 0.02%(4) | 9.77E-03 |
| hydroxymethylglutaryl-CoA lyase activity                                                | 0.12%(1,1↑,0↓) | 0.00%(1) | 0.00E+00 |
| inositol oxygenase activity                                                             | 0.12%(1,1↑,0↓) | 0.00%(1) | 0.00E+00 |
| ion channel inhibitor activity                                                          | 0.12%(1,0↑,1↓) | 0.00%(1) | 0.00E+00 |
| malate synthase activity                                                                | 0.12%(1,1↑,0↓) | 0.00%(1) | 0.00E+00 |
| mevalonate kinase activity                                                              | 0.12%(1,1↑,0↓) | 0.01%(3) | 5.02E-03 |
| oxidoreductase activity, acting on single donors with incorporation of molecular oxygen | 0.12%(1,1↑,0↓) | 0.01%(3) | 5.02E-03 |
| oxo-acid-lyase activity                                                                 | 0.12%(1,0↑,1↓) | 0.02%(4) | 9.77E-03 |
| pantoate-beta-alanine ligase activity                                                   | 0.12%(1,1↑,0↓) | 0.01%(2) | 1.72E-03 |
| peroxiredoxin activity                                                                  | 0.12%(1,1↑,0↓) | 0.01%(3) | 5.02E-03 |
| phosphoglycerate dehydrogenase activity                                                 | 0.12%(1,1↑,0↓) | 0.02%(4) | 9.77E-03 |
| phosphomethylpyrimidine kinase activity                                                 | 0.12%(1,0↑,1↓) | 0.00%(1) | 0.00E+00 |
| porphobilinogen synthase activity                                                       | 0.12%(1,1↑,0↓) | 0.01%(2) | 1.72E-03 |
| proline-tRNA ligase activity                                                            | 0.12%(1,0↑,1↓) | 0.02%(4) | 9.77E-03 |
| pyruvate, phosphate dikinase activity                                                   | 0.12%(1,1↑,0↓) | 0.01%(2) | 1.72E-03 |
| ribonucleoside-diphosphate reductase activity                                           | 0.12%(1,0↑,1↓) | 0.02%(4) | 9.77E-03 |
| ribulose-phosphate 3-epimerase activity                                                 | 0.12%(1,0↑,1↓) | 0.01%(3) | 5.02E-03 |

|                                             |                |          |          |
|---------------------------------------------|----------------|----------|----------|
| selenium binding                            | 0.12%(1,1↑,0↓) | 0.02%(4) | 9.77E-03 |
| shikimate 3-dehydrogenase (NADP+) activity  | 0.12%(1,0↑,1↓) | 0.01%(3) | 5.02E-03 |
| signal recognition particle binding         | 0.12%(1,0↑,1↓) | 0.01%(2) | 1.72E-03 |
| thiamine-phosphate diphosphorylase activity | 0.12%(1,0↑,1↓) | 0.00%(1) | 0.00E+00 |

---

**ESI Table S9.**

Significant pathway enrichment analysis in KEGG in each pair of rice libraries. Pathways with *P*-value < 0.05 indicate significantly enriched in differentially expressed genes (DEGs).

| Pathway                                             | DEGs(107)         | Genes(2048) | <i>P</i> -value | Pathway_ID |
|-----------------------------------------------------|-------------------|-------------|-----------------|------------|
| <b>Shoot+IPU vs Shoot-IPU</b>                       |                   |             |                 |            |
| Protein processing in endoplasmic reticulum         | 16(14.95%,10↑,6↓) | 182(8.89%)  | 0.011266        | osa04141   |
| Circadian rhythm - plant                            | 6(5.61%,0↑,6↓)    | 25(1.22%)   | 0.000192        | osa04712   |
| Phosphatidylinositol sigling system                 | 3(2.80%,3↑,0↓)    | 23(1.12%)   | 0.028911        | osa04070   |
| Alanine, aspartate and glutamate metabolism         | 2(1.87%,2↑,0↓)    | 5(0.24%)    | 0.001285        | osa00250   |
| Caffeine metabolism                                 | 2(1.87%,1↑,1↓)    | 2(0.10%)    | 0               | osa00232   |
| Cutin, suberine and wax biosynthesis                | 2(1.87%,2↑,0↓)    | 13(0.63%)   | 0.027028        | osa00073   |
| Fatty acid elongation                               | 2(1.87%,2↑,0↓)    | 10(0.49%)   | 0.012715        | osa00062   |
| Fructose and mannose metabolism                     | 2(1.87%,1↑,1↓)    | 6(0.29%)    | 0.002472        | osa00051   |
| Galactose metabolism                                | 2(1.87%,2↑,0↓)    | 8(0.39%)    | 0.006407        | osa00052   |
| Inositol phosphate metabolism                       | 2(1.87%,2↑,0↓)    | 16(0.78%)   | 0.047242        | osa00562   |
| Thiamine metabolism                                 | 2(1.87%,0↑,2↓)    | 4(0.20%)    | 0.000534        | osa00730   |
| Butanoate metabolism                                | 1(0.93%,1↑,0↓)    | 3(0.15%)    | 0.007839        | osa00650   |
| Cysteine and methionine metabolism                  | 1(0.93%,1↑,0↓)    | 7(0.34%)    | 0.047808        | osa00270   |
| Other glycan degradation                            | 1(0.93%,0↑,1↓)    | 6(0.29%)    | 0.035338        | osa00511   |
| Sulfur metabolism                                   | 1(0.93%,1↑,0↓)    | 6(0.29%)    | 0.035338        | osa00920   |
| Ubiquinone and other terpenoid-quinone biosynthesis | 1(0.93%,1↑,0↓)    | 5(0.24%)    | 0.024382        | osa00130   |
| Pathway                                             | DEGs(142)         | Genes(2048) | <i>P</i> _value | Pathway_ID |
| <b>Root+IPU vs Root-IPU</b>                         |                   |             |                 |            |
| Ubiquitin mediated proteolysis                      | 7(4.93%,5↑,2↓)    | 54(2.64%)   | 0.029886        | osa04120   |
| Diterpenoid biosynthesis                            | 4(2.82%,1↑,3↓)    | 17(0.83%)   | 0.004679        | osa00904   |
| Biosynthesis of amino acids                         | 3(2.11%,2↑,1↓)    | 18(0.88%)   | 0.031586        | osa01230   |
| Cysteine and methionine metabolism                  | 3(2.11%,2↑,1↓)    | 7(0.34%)    | 0.000658        | osa00270   |
| Fructose and mannose metabolism                     | 3(2.11%,1↑,2↓)    | 6(0.29%)    | 0.000298        | osa00051   |
| Photosynthesis - anten proteins                     | 3(2.11%,1↑,2↓)    | 14(0.68%)   | 0.012829        | osa00196   |
| Sphingolipid metabolism                             | 3(2.11%,2↑,1↓)    | 13(0.63%)   | 0.009676        | osa00600   |
| Alanine, aspartate and glutamate metabolism         | 2(1.41%,2↑,0↓)    | 5(0.24%)    | 0.002944        | osa00250   |
| Galactose metabolism                                | 2(1.41%,2↑,0↓)    | 8(0.39%)    | 0.014113        | osa00052   |
| Sulfur metabolism                                   | 2(1.41%,2↑,0↓)    | 6(0.29%)    | 0.005589        | osa00920   |
| 2-Oxocarboxylic acid metabolism                     | 1(0.70%,0↑,1↓)    | 4(0.20%)    | 0.026108        | osa01210   |
| Arachidonic acid metabolism                         | 1(0.70%,1↑,0↓)    | 4(0.20%)    | 0.026108        | osa00590   |
| Biosynthesis of unsaturated fatty acids             | 1(0.70%,0↑,1↓)    | 4(0.20%)    | 0.026108        | osa01040   |
| Butanoate metabolism                                | 1(0.70%,1↑,0↓)    | 3(0.15%)    | 0.013674        | osa00650   |
| Caffeine metabolism                                 | 1(0.70%,1↑,0↓)    | 2(0.10%)    | 0.004776        | osa00232   |
| Degradation of aromatic compounds                   | 1(0.70%,0↑,1↓)    | 1(0.05%)    | 0               | osa01220   |
| Fatty acid biosynthesis                             | 1(0.70%,0↑,1↓)    | 5(0.24%)    | 0.041551        | osa00061   |
| Flavonoid biosynthesis                              | 1(0.70%,0↑,1↓)    | 3(0.15%)    | 0.013674        | osa00941   |
| Glycosphingolipid biosynthesis - globo series       | 1(0.70%,1↑,0↓)    | 2(0.10%)    | 0.004776        | osa00603   |

|                                             |                |          |          |          |
|---------------------------------------------|----------------|----------|----------|----------|
| One carbon pool by folate                   | 1(0.70%,0↑,1↓) | 2(0.10%) | 0.004776 | osa00670 |
| Taurine and hypotaurine metabolism          | 1(0.70%,1↑,0↓) | 4(0.20%) | 0.026108 | osa00430 |
| Thiamine metabolism                         | 1(0.70%,0↑,1↓) | 4(0.20%) | 0.026108 | osa00730 |
| Valine, leucine and isoleucine biosynthesis | 1(0.70%,0↑,1↓) | 4(0.20%) | 0.026108 | osa00290 |

---

**ESI Table S10.** The expression of IPU-associated genes encoding detoxification enzymes family, antioxidase family, transporters family and transcription factors family. Detoxification enzymes family include P450 family, oxidoreductase family, monooxygenase family, glucosyltransferase (GTs) family, glutathione S-transferase (GST) family, methyltransferase family, hydrolase family, acyltransferase family and S/TPK family. Antioxidase family include laccase family, monodehydroascorbate reductase family, superoxide dismutase (SOD) family, peroxidase (POD) family, ascorbate peroxidase (APX) family and catalase (CAT) family. Transporters family include MATE family, ABC transporters family, amino acid family, (oligo) peptide family, sugar family, monosaccharide transporters family and multidrug resistance protein (MRP) family. Red boxes indicate  $\text{Log}_2(\text{IPU}/\text{CK}) \geq 1$ , and blue boxes indicate  $\text{Log}_2(\text{IPU}/\text{CK}) \leq -1$ . Inf and -Inf indicate positive infinity and negative infinity, respectively.  $\uparrow$ , the number of up-regulated genes;  $\downarrow$ , the number of down-regulated genes. Red regions indicate the up-regulation. Blue regions indicate the down-regulation.

| Gene both in shoot and root |                                      |                                 | Gene only in shoot |                                      | Gene only in root |                                      |
|-----------------------------|--------------------------------------|---------------------------------|--------------------|--------------------------------------|-------------------|--------------------------------------|
| Gene ID                     | $\text{Log}_2(\text{IPU}/\text{CK})$ |                                 | Gene ID            | $\text{Log}_2(\text{IPU}/\text{CK})$ | Gene ID           | $\text{Log}_2(\text{IPU}/\text{CK})$ |
|                             | Shoot                                | Root                            |                    | Shoot                                |                   | Root                                 |
| <b>Metabolic enzymes</b>    |                                      |                                 |                    |                                      |                   |                                      |
| <b>Cytochrome P450</b>      | 17 $\uparrow$ , 12 $\downarrow$      | 16 $\uparrow$ , 11 $\downarrow$ |                    | 7 $\uparrow$ , 14 $\downarrow$       |                   | 9 $\uparrow$ , 17 $\downarrow$       |
| Os02t0571900-01             | Inf                                  | -Inf                            | Os08t0243500-02    | Inf                                  | Os01t0627900-01   | -Inf                                 |
| Os01t0728300-01             | 0.057                                | 4.000                           | Os08t0507100-00    | 4.230                                | Os02t0570700-01   | -Inf                                 |
| Os11t0525200-02             | -1.740                               | 2.963                           | Os02t0186200-00    | 2.780                                | Os07t0418500-02   | -Inf                                 |
| Os10t0166600-01             | 0.032                                | 2.322                           | Os02t0185400-01    | 2.600                                | Os08t0105400-00   | -Inf                                 |
| Os08t0152400-00             | 0.647                                | 2.023                           | Os01t0602500-01    | 1.680                                | Os01t0377250-00   | Inf                                  |
| Os11t0143200-01             | 1.030                                | 2.000                           | Os10t0144700-00    | 1.120                                | Os03t0603100-00   | Inf                                  |
| Os08t0547300-01             | 1.920                                | 1.841                           | Os05t0515200-01    | 1.110                                | Os01t0628000-01   | 2.193                                |
| Os01t0543600-01             | -0.215                               | 1.784                           | Os06t0680700-01    | 0.989                                | Os05t0181200-01   | 1.826                                |
| Os03t0760300-01             | -0.002                               | 1.766                           | Os02t0173100-01    | 0.955                                | Os07t0418500-01   | 1.392                                |
| Os02t0173100-02             | 0.012                                | 1.700                           | Os10t0514400-01    | 0.785                                | Os01t0627800-01   | 1.379                                |
| Os08t0507702-01             | 1.350                                | 1.218                           | Os01t0627933-00    | 0.692                                | Os11t0483000-00   | 1.111                                |
| Os03t0248200-01             | -0.166                               | 1.138                           | Os01t0227700-01    | 0.656                                | Os01t0388101-00   | 1.100                                |
| Os07t0217600-01             | -0.023                               | 1.138                           | Os05t0211100-01    | 0.267                                | Os03t0417700-01   | 1.098                                |
| Os03t0594900-01             | 0.065                                | 1.119                           | Os06t0642500-02    | -0.021                               | Os02t0569400-01   | 0.743                                |
| Os06t0642500-01             | -0.450                               | 1.115                           | Os08t0105800-01    | -0.224                               | Os05t0382500-01   | 0.568                                |
| Os01t0197100-00             | -0.272                               | 1.062                           | Os10t0378100-01    | -0.250                               | Os10t0514901-00   | 0.509                                |
| Os07t0518100-01             | -0.853                               | 1.034                           | Os03t0140100-02    | -0.385                               | Os02t0221900-02   | 0.415                                |
| Os03t0760200-01             | 1.210                                | 0.888                           | Os07t0681300-00    | -0.396                               | Os12t0443000-00   | 0.415                                |
| Os09t0528700-00             | -3.950                               | 0.871                           | Os01t0349800-01    | -0.467                               | Os03t0594100-01   | 0.396                                |
| Os05t0405600-01             | 0.703                                | 0.813                           | Os02t0570500-01    | -0.475                               | Os09t0403300-00   | 0.348                                |
| Os04t0480700-01             | 1.410                                | 0.807                           | Os11t0289700-01    | -0.521                               | Os07t0635200-00   | 0.320                                |
| Os01t0627500-01             | -0.043                               | 0.804                           | Os11t0465200-02    | -0.654                               | Os06t0565100-00   | 0.255                                |
| Os01t0544200-01             | -0.904                               | 0.663                           | Os06t0267400-00    | -0.694                               | Os10t0171500-02   | 0.220                                |
| Os02t0185200-01             | -0.092                               | 0.650                           | Os10t0525000-02    | -0.759                               | Os10t0167250-00   | 0.186                                |
| Os12t0139300-01             | 0.470                                | 0.640                           | Os02t0323600-01    | -0.893                               | Os06t0641200-00   | 0.175                                |
| Os10t0524700-00             | 0.846                                | 0.615                           | Os02t0278400-01    | -0.917                               | Os07t0520300-01   | 0.147                                |
| Os08t0508000-01             | 2.320                                | 0.600                           | Os08t0262500-01    | -0.953                               | Os09t0447500-01   | 0.125                                |

|                 |        |        |                 |        |                 |        |
|-----------------|--------|--------|-----------------|--------|-----------------|--------|
| Os10t0317900-01 | -0.327 | 0.597  | Os04t0407900-01 | -1.080 | Os06t0641500-00 | 0.000  |
| Os08t0243500-01 | -0.103 | 0.554  | Os06t0640100-00 | -1.080 | Os10t0165300-01 | 0.000  |
| Os03t0370900-01 | 0.601  | 0.531  | Os10t0164500-00 | -1.110 | Os06t0500700-01 | -0.005 |
| Os09t0530300-01 | 0.249  | 0.503  | Os10t0196000-01 | -1.320 | Os05t0482400-01 | -0.060 |
| Os01t0804400-01 | -0.424 | 0.493  | Os02t0278400-02 | -1.370 | Os04t0570000-00 | -0.067 |
| Os07t0635300-01 | -0.130 | 0.493  | Os02t0504000-01 | -1.560 | Os10t0167200-00 | -0.110 |
| Os10t0515200-01 | 0.565  | 0.476  | Os09t0264400-01 | -1.600 | Os06t0191800-01 | -0.131 |
| Os09t0558900-01 | 0.104  | 0.437  | Os03t0140100-01 | -1.860 | Os02t0666500-01 | -0.234 |
| Os01t0627400-01 | -1.130 | 0.425  | Os03t0248300-01 | -2.000 | Os06t0146700-01 | -0.263 |
| Os10t0139700-01 | 1.020  | 0.355  | Os11t0635500-01 | -2.020 | Os01t0854800-01 | -0.266 |
| Os12t0582700-01 | Inf    | 0.323  | Os03t0658800-01 | -2.260 | Os03t0760000-01 | -0.363 |
| Os06t0639800-01 | -0.681 | 0.322  | Os03t0658800-03 | -2.440 | Os05t0415800-01 | -0.370 |
| Os10t0513900-01 | 0.370  | 0.302  | Os08t0152300-00 | -2.470 | Os07t0647200-00 | -0.377 |
| Os06t0570100-01 | -0.411 | 0.300  | Os04t0171800-01 | -2.880 | Os01t0803900-01 | -0.390 |
| Os05t0424300-01 | -0.574 | 0.294  |                 |        | Os12t0512800-01 | -0.515 |
| Os08t0465700-01 | -0.096 | 0.230  |                 |        | Os06t0600400-01 | -0.569 |
| Os01t0700900-01 | -0.460 | 0.209  |                 |        | Os12t0134900-01 | -0.585 |
| Os04t0653400-01 | -0.343 | 0.208  |                 |        | Os02t0529800-00 | -0.608 |
| Os01t0211200-00 | 0.274  | 0.199  |                 |        | Os10t0439924-01 | -0.637 |
| Os10t0320100-01 | -0.790 | 0.193  |                 |        | Os10t0403000-00 | -0.737 |
| Os12t0119000-01 | -0.467 | 0.193  |                 |        | Os12t0118900-01 | -0.737 |
| Os03t0850200-00 | -0.121 | 0.193  |                 |        | Os06t0613600-01 | -0.745 |
| Os02t0185300-01 | 0.824  | 0.193  |                 |        | Os01t0377000-01 | -0.756 |
| Os06t0129900-02 | Inf    | 0.188  |                 |        | Os04t0178400-01 | -1.000 |
| Os06t0328900-01 | 0.483  | 0.145  |                 |        | Os09t0530275-00 | -1.059 |
| Os01t0628700-01 | 1.090  | 0.145  |                 |        | Os01t0627600-01 | -1.101 |
| Os07t0635500-01 | 1.230  | 0.132  |                 |        | Os06t0349700-00 | -1.248 |
| Os07t0635700-00 | -0.820 | 0.126  |                 |        | Os05t0372300-01 | -1.263 |
| Os06t0102100-01 | -0.332 | 0.126  |                 |        | Os02t0569000-01 | -1.515 |
| Os07t0644600-01 | 0.378  | 0.102  |                 |        | Os02t0184700-00 | -1.663 |
| Os02t0108800-01 | -2.630 | 0.102  |                 |        | Os12t0582000-00 | -1.700 |
| Os06t0599200-01 | 2.280  | 0.049  |                 |        | Os01t0561600-01 | -1.729 |
| Os09t0441400-01 | 0.374  | 0.043  |                 |        | Os10t0515900-01 | -1.907 |
| Os06t0129900-01 | -1.280 | 0.031  |                 |        | Os04t0180400-01 | -2.115 |
| Os06t0204100-00 | 0.613  | 0.024  |                 |        | Os06t0642600-00 | -3.000 |
| Os01t0804900-01 | 1.550  | 0.004  |                 |        | Os02t0569400-02 | -3.544 |
| Os02t0817900-01 | -0.394 | 0.000  |                 |        |                 |        |
| Os06t0294600-02 | 0.333  | -0.015 |                 |        |                 |        |
| Os05t0494000-01 | 0.500  | -0.024 |                 |        |                 |        |
| Os06t0641800-00 | -0.789 | -0.038 |                 |        |                 |        |
| Os01t0951500-01 | 0.230  | -0.039 |                 |        |                 |        |
| Os03t0760500-01 | -1.410 | -0.042 |                 |        |                 |        |
| Os01t0388000-01 | -0.987 | -0.061 |                 |        |                 |        |
| Os02t0184900-01 | 0.207  | -0.067 |                 |        |                 |        |
| Os01t0211600-01 | 0.387  | -0.109 |                 |        |                 |        |

|                 |        |        |  |  |  |  |
|-----------------|--------|--------|--|--|--|--|
| Os10t0512400-01 | -1.730 | -0.135 |  |  |  |  |
| Os02t0204700-00 | -0.587 | -0.151 |  |  |  |  |
| Os03t0367101-00 | 0.592  | -0.151 |  |  |  |  |
| Os08t0472800-01 | 0.449  | -0.175 |  |  |  |  |
| Os01t0183600-01 | 0.614  | -0.184 |  |  |  |  |
| Os03t0370900-02 | -0.863 | -0.222 |  |  |  |  |
| Os06t0501900-01 | -0.746 | -0.226 |  |  |  |  |
| Os02t0221900-01 | -0.085 | -0.259 |  |  |  |  |
| Os02t0173100-03 | -3.270 | -0.263 |  |  |  |  |
| Os01t0858350-01 | -0.511 | -0.265 |  |  |  |  |
| Os05t0200400-01 | 0.718  | -0.268 |  |  |  |  |
| Os01t0227400-01 | -0.752 | -0.280 |  |  |  |  |
| Os03t0140200-01 | -0.536 | -0.287 |  |  |  |  |
| Os05t0320700-02 | 0.025  | -0.331 |  |  |  |  |
| Os09t0457100-01 | 0.838  | -0.348 |  |  |  |  |
| Os12t0150200-01 | 2.290  | -0.363 |  |  |  |  |
| Os02t0186900-01 | -0.399 | -0.387 |  |  |  |  |
| Os04t0469800-01 | -0.338 | -0.389 |  |  |  |  |
| Os03t0650200-00 | 0.540  | -0.399 |  |  |  |  |
| Os11t0525200-01 | 0.183  | -0.406 |  |  |  |  |
| Os03t0227700-01 | -0.696 | -0.412 |  |  |  |  |
| Os05t0405500-01 | 0.208  | -0.443 |  |  |  |  |
| Os04t0101400-01 | -0.891 | -0.577 |  |  |  |  |
| Os03t0223100-02 | -1.580 | -0.585 |  |  |  |  |
| Os12t0582666-00 | -0.103 | -0.585 |  |  |  |  |
| Os09t0447300-01 | 0.282  | -0.608 |  |  |  |  |
| Os01t0227500-01 | -0.789 | -0.637 |  |  |  |  |
| Os05t0445100-01 | 0.625  | -0.645 |  |  |  |  |
| Os05t0101600-01 | -0.279 | -0.678 |  |  |  |  |
| Os01t0602400-01 | 0.707  | -0.678 |  |  |  |  |
| Os03t0367200-01 | 0.858  | -0.705 |  |  |  |  |
| Os02t0503900-01 | 0.713  | -0.774 |  |  |  |  |
| Os10t0486100-00 | 0.104  | -0.829 |  |  |  |  |
| Os04t0560100-01 | 0.296  | -0.848 |  |  |  |  |
| Os11t0151400-01 | 1.500  | -0.921 |  |  |  |  |
| Os03t0332100-00 | -0.676 | -1.000 |  |  |  |  |
| Os03t0134500-00 | -0.071 | -1.093 |  |  |  |  |
| Os12t0268000-01 | 0.682  | -1.117 |  |  |  |  |
| Os07t0518500-02 | -1.680 | -1.131 |  |  |  |  |
| Os03t0602300-01 | -0.239 | -1.280 |  |  |  |  |
| Os02t0186800-00 | -4.630 | -1.451 |  |  |  |  |
| Os06t0640800-00 | -0.422 | -1.503 |  |  |  |  |
| Os10t0525000-01 | 0.343  | -2.000 |  |  |  |  |
| Os11t0489250-00 | -1.660 | -3.198 |  |  |  |  |
| Os02t0569900-01 | 2.220  | -3.954 |  |  |  |  |

| Oxidoreductase  | 6 ↑, 3 ↓ | 5 ↑, 8 ↓ |                 | 1 ↑, 5 ↓ |                 | 0 ↑, 4 ↓ |
|-----------------|----------|----------|-----------------|----------|-----------------|----------|
| Os07t0675000-03 | Inf      | 3.858    | Os10t0558700-01 | 2.830    | Os07t0664150-00 | -Inf     |
| Os03t0774200-02 | 2.400    | 0.160    | Os03t0784000-03 | 0.985    | Os10t0558400-00 | 0.126    |
| Os03t0713400-03 | 2.000    | Inf      | Os08t0379400-03 | 0.659    | Os01t0316100-00 | 0.000    |
| Os07t0663800-01 | 1.300    | 0.473    | Os10t0558750-01 | 0.604    | Os11t0255500-01 | -0.153   |
| Os10t0516300-01 | 1.090    | 0.962    | Os11t0287100-00 | 0.370    | Os09t0514100-02 | -0.170   |
| Os10t0536400-01 | 1.050    | 0.215    | Os08t0379400-02 | 0.245    | Os12t0260500-01 | -0.481   |
| Os01t0120600-01 | 0.613    | 0.531    | Os01t0777700-00 | 0.209    | Os07t0663900-00 | -0.931   |
| Os01t0830100-01 | 0.590    | 0.510    | Os08t0379400-01 | 0.091    | Os07t0592100-01 | -1.000   |
| Os03t0122300-02 | 0.511    | -0.900   | Os05t0538900-01 | -0.009   | Os09t0445600-01 | -1.037   |
| Os09t0567366-02 | 0.501    | Inf      | Os04t0668800-01 | -0.186   | Os07t0663700-01 | -1.766   |
| Os03t0690500-00 | 0.479    | 0.376    | Os10t0475100-00 | -0.230   |                 |          |
| Os08t0485400-01 | 0.386    | -0.263   | Os02t0320800-01 | -0.322   |                 |          |
| Os03t0101600-01 | 0.378    | 0.366    | Os02t0280700-01 | -0.333   |                 |          |
| Os02t0150300-01 | 0.317    | 0.091    | Os01t0126200-01 | -0.488   |                 |          |
| Os03t0713400-01 | 0.294    | -0.112   | Os05t0411200-01 | -0.835   |                 |          |
| Os01t0720300-00 | 0.286    | -0.134   | Os09t0567366-03 | -0.839   |                 |          |
| Os05t0533700-01 | 0.263    | 0.412    | Os01t0274100-00 | -0.910   |                 |          |
| Os01t0809900-01 | 0.240    | 0.329    | Os10t0113900-01 | -1.050   |                 |          |
| Os09t0524500-01 | 0.218    | -0.111   | Os04t0473025-00 | -1.220   |                 |          |
| Os09t0567366-01 | 0.156    | 0.090    | Os04t0678700-01 | -1.840   |                 |          |
| Os09t0514100-01 | 0.147    | 0.000    | Os10t0559200-01 | -2.250   |                 |          |
| Os10t0576000-01 | 0.136    | -0.340   | Os10t0558700-03 | -2.540   |                 |          |
| Os07t0585800-01 | 0.123    | 0.057    |                 |          |                 |          |
| Os05t0313500-01 | 0.081    | 0.391    |                 |          |                 |          |
| Os06t0214900-01 | 0.076    | 0.234    |                 |          |                 |          |
| Os01t0723400-01 | 0.071    | 0.559    |                 |          |                 |          |
| Os08t0391700-00 | 0.070    | -1.184   |                 |          |                 |          |
| Os03t0313000-01 | 0.012    | -0.089   |                 |          |                 |          |
| Os03t0129900-01 | 0.009    | -0.509   |                 |          |                 |          |
| Os09t0503100-01 | 0.005    | -0.382   |                 |          |                 |          |
| Os02t0235900-01 | 0.003    | -0.042   |                 |          |                 |          |
| Os10t0474100-00 | -0.015   | 0.325    |                 |          |                 |          |
| Os07t0564500-01 | -0.045   | -1.229   |                 |          |                 |          |
| Os10t0403700-00 | -0.047   | -0.051   |                 |          |                 |          |
| Os10t0474900-00 | -0.066   | 0.474    |                 |          |                 |          |
| Os04t0372700-01 | -0.096   | -1.000   |                 |          |                 |          |
| Os01t0227100-02 | -0.105   | Inf      |                 |          |                 |          |
| Os07t0645400-02 | -0.120   | -7.943   |                 |          |                 |          |
| Os01t0173000-01 | -0.132   | -0.170   |                 |          |                 |          |
| Os01t0328700-01 | -0.140   | 0.020    |                 |          |                 |          |
| Os05t0552500-02 | -0.151   | 0.464    |                 |          |                 |          |
| Os09t0500200-01 | -0.153   | -0.355   |                 |          |                 |          |
| Os10t0561100-01 | -0.154   | -1.170   |                 |          |                 |          |
| Os11t0645200-01 | -0.188   | -0.402   |                 |          |                 |          |



|                     |                  |                  |                 |                  |                 |                  |
|---------------------|------------------|------------------|-----------------|------------------|-----------------|------------------|
| Os05t0401500-01     | -0.222           | 0.056            |                 |                  |                 |                  |
| Os08t0431500-01     | -0.270           | -0.244           |                 |                  |                 |                  |
| Os07t0155100-01     | -0.303           | -0.585           |                 |                  |                 |                  |
| Os10t0579300-01     | -0.305           | -0.404           |                 |                  |                 |                  |
| Os01t0727400-01     | -0.308           | 0.459            |                 |                  |                 |                  |
| Os10t0558900-01     | -0.346           | -1.415           |                 |                  |                 |                  |
| Os02t0621800-01     | -0.357           | -0.185           |                 |                  |                 |                  |
| Os12t0534000-01     | -0.361           | -0.074           |                 |                  |                 |                  |
| Os03t0774200-01     | -0.401           | -0.129           |                 |                  |                 |                  |
| Os03t0713400-02     | -0.496           | -1.366           |                 |                  |                 |                  |
| Os06t0286310-01     | -0.509           | -0.464           |                 |                  |                 |                  |
| Os08t0151800-01     | -0.597           | -0.331           |                 |                  |                 |                  |
| Os01t0558800-01     | -0.612           | 0.848            |                 |                  |                 |                  |
| Os03t0341300-01     | -0.636           | -0.637           |                 |                  |                 |                  |
| Os07t0664000-00     | -0.668           | -0.048           |                 |                  |                 |                  |
| Os04t0227500-01     | -0.712           | -0.453           |                 |                  |                 |                  |
| Os01t0273800-01     | -0.725           | -0.280           |                 |                  |                 |                  |
| Os08t0390200-01     | -0.742           | -1.807           |                 |                  |                 |                  |
| Os06t0181400-01     | -0.888           | -0.874           |                 |                  |                 |                  |
| Os01t0901700-01     | -0.893           | 1.663            |                 |                  |                 |                  |
| Os05t0363600-01     | -0.893           | -0.287           |                 |                  |                 |                  |
| Os01t0370000-01     | -1.120           | 0.498            |                 |                  |                 |                  |
| Os01t0190000-01     | -1.230           | -0.462           |                 |                  |                 |                  |
| Os06t0178700-01     | -2.220           | 0.263            |                 |                  |                 |                  |
| <b>Monoxygenase</b> | <b>2 ↑ , 6 ↓</b> | <b>3 ↑ , 5 ↓</b> |                 | <b>1 ↑ , 1 ↓</b> |                 | <b>5 ↑ , 6 ↓</b> |
| Os04t0128900-01     | 1.280            | 0.018            | Os01t0645400-01 | 3.690            | Os09t0441600-00 |                  |
| Os06t0203200-01     | 1.200            | 0.848            | Os07t0291750-00 | 0.785            | Os01t0627600-01 | -1.101           |
| Os02t0471300-01     | 0.817            | 0.415            | Os11t0287100-00 | 0.370            | Os03t0231700-02 | -1.178           |
| Os09t0549300-00     | 0.723            | -0.585           | Os09t0441700-00 | 0.129            | Os01t0700500-01 | -1.322           |
| Os06t0698785-01     | 0.653            | 1.023            | Os02t0561500-00 | -0.331           | Os07t0112000-00 | -1.485           |
| Os03t0231800-03     | 0.119            | 0.318            | Os12t0512000-01 | -0.708           | Os02t0569400-02 | -3.544           |
| Os03t0231800-02     | 0.084            | 0.026            | Os01t0274100-00 | -0.910           | Os09t0441625-00 | Inf              |
| Os10t0553800-01     | 0.020            | 0.524            | Os07t0111900-00 | -1.050           | Os01t0728300-01 | 4.000            |
| Os07t0437000-01     | -0.293           | -0.032           |                 |                  | Os01t0627800-01 | 1.379            |
| Os01t0680900-01     | -0.363           | -0.205           |                 |                  | Os01t0388101-00 | 1.100            |
| Os04t0223500-01     | -0.455           | -2.550           |                 |                  | Os03t0182000-00 | 1.000            |
| Os08t0547900-01     | -0.636           | -1.606           |                 |                  | Os10t0317900-01 | 0.597            |
| Os10t0317900-02     | -0.652           | -1.208           |                 |                  | Os01t0627400-01 | 0.425            |
| Os02t0503100-00     | -0.800           | -0.684           |                 |                  | Os02t0221900-02 | 0.415            |
| Os03t0231700-01     | -0.805           | -0.240           |                 |                  | Os02t0580600-01 | 0.379            |
| Os01t0645400-02     | -0.853           | 1.322            |                 |                  | Os01t0700900-01 | 0.209            |
| Os01t0901700-01     | -0.893           | 1.663            |                 |                  | Os10t0320100-01 | 0.193            |
| Os04t0223901-00     | -0.999           | -1.766           |                 |                  | Os03t0162000-01 | 0.160            |
| Os06t0528700-01     | -1.090           | -0.485           |                 |                  | Os01t0224700-01 | 0.000            |
| Os06t0649700-00     | -1.440           | 0.119            |                 |                  | Os01t0388000-01 | -0.061           |

|                 |             |             |                 |           |                 |           |
|-----------------|-------------|-------------|-----------------|-----------|-----------------|-----------|
| Os04t0423100-00 | -2.110      | -1.152      |                 |           | Os01t0732700-01 | -0.372    |
| Os10t0554300-00 | -2.700      | -0.415      |                 |           | Os12t0512800-01 | -0.515    |
| Os09t0548400-01 | -3.020      | -0.310      |                 |           | Os01t0602400-01 | -0.678    |
| Os07t0111700-01 | -4.970      | 0.153       |                 |           |                 |           |
| <b>GTs</b>      | 22 ↑ , 23 ↓ | 11 ↑ , 13 ↓ |                 | 4 ↑ , 6 ↓ |                 | 2 ↑ , 8 ↓ |
| Os10t0180000-02 | -Inf        | -Inf        | Os04t0271700-01 | 3.430     | Os05t0301500-03 | -Inf      |
| Os05t0499800-01 | -Inf        | -1.551      | Os04t0271700-02 | 1.250     | Os08t0446550-00 | 2.087     |
| Os10t0437000-03 | Inf         | -4.170      | Os01t0805500-00 | 1.090     | Os04t0319800-01 | 1.141     |
| Os04t0693000-02 | 5.230       | Inf         | Os04t0272200-01 | 1.010     | Os04t0206600-01 | 0.807     |
| Os09t0518200-01 | 2.180       | 0.429       | Os10t0331600-00 | 0.881     | Os03t0702000-01 | 0.652     |
| Os04t0206700-01 | 2.070       | 0.556       | Os01t0734600-01 | 0.608     | Os02t0242900-00 | 0.531     |
| Os02t0206400-00 | 2.010       | -0.710      | Os04t0197500-00 | 0.540     | Os04t0130433-00 | 0.290     |
| Os05t0526900-01 | 1.950       | 0.611       | Os05t0177500-01 | 0.498     | Os06t0283100-00 | 0.238     |
| Os07t0503300-02 | 1.950       | 0.035       | Os07t0490100-02 | 0.370     | Os07t0486700-00 | 0.197     |
| Os01t0176200-01 | 1.950       | -0.585      | Os01t0686200-01 | 0.343     | Os03t0824600-00 | 0.170     |
| Os03t0757000-01 | 1.940       | 0.326       | Os04t0272700-04 | 0.339     | Os07t0672700-00 | 0.070     |
| Os10t0555100-01 | 1.830       | -0.289      | Os01t0919400-00 | 0.334     | Os05t0527100-00 | 0.009     |
| Os02t0203300-00 | 1.820       | 0.645       | Os11t0444000-01 | 0.026     | Os07t0202000-00 | 0.000     |
| Os03t0841600-01 | 1.780       | 0.507       | Os04t0565400-01 | -0.077    | Os09t0480400-01 | 0.000     |
| Os02t0755900-01 | 1.410       | 0.056       | Os09t0119600-01 | -0.155    | Os03t0804900-00 | -0.050    |
| Os01t0805400-01 | 1.390       | 0.579       | Os07t0503500-01 | -0.432    | Os05t0527000-01 | -0.058    |
| Os07t0503300-01 | 1.370       | 0.831       | Os07t0503500-02 | -0.524    | Os01t0686300-01 | -0.142    |
| Os01t0734800-02 | 1.370       | -0.222      | Os01t0516700-01 | -0.713    | Os01t0620800-01 | -0.303    |
| Os01t0119000-02 | 1.330       | -4.728      | Os02t0207400-00 | -0.785    | Os03t0643800-00 | -0.415    |
| Os07t0657400-01 | 1.310       | 0.624       | Os07t0489200-01 | -0.928    | Os06t0282400-00 | -0.447    |
| Os01t0176200-02 | 1.200       | 0.459       | Os01t0735300-01 | -1.080    | Os03t0702500-01 | -0.485    |
| Os11t0599200-01 | 1.120       | 0.405       | Os07t0490100-01 | -1.110    | Os01t0597800-01 | -0.544    |
| Os10t0178500-01 | 1.030       | 1.170       | Os11t0457000-00 | -1.190    | Os01t0175850-00 | -0.667    |
| Os02t0330200-01 | 1.020       | 0.046       | Os05t0527800-01 | -1.250    | Os02t0242100-01 | -0.712    |
| Os07t0241800-01 | 0.977       | 0.366       | Os05t0527900-01 | -1.310    | Os04t0529700-01 | -0.759    |
| Os09t0518400-00 | 0.955       | -Inf        | Os01t0880200-02 | -2.760    | Os06t0706850-00 | -0.788    |
| Os04t0556500-01 | 0.913       | -0.238      |                 |           | Os06t0212300-00 | -0.878    |
| Os03t0567600-02 | 0.784       | 0.649       |                 |           | Os04t0565200-01 | -0.893    |
| Os03t0757100-00 | 0.765       | -0.485      |                 |           | Os05t0493600-00 | -0.893    |
| Os09t0518000-00 | 0.727       | -0.415      |                 |           | Os07t0241600-00 | -1.000    |
| Os06t0593200-01 | 0.705       | -0.474      |                 |           | Os04t0319700-00 | -1.222    |
| Os02t0755600-01 | 0.689       | 0.690       |                 |           | Os01t0736300-01 | -1.322    |
| Os01t0906000-01 | 0.669       | -0.943      |                 |           | Os08t0168700-00 | -2.115    |
| Os03t0300000-02 | 0.663       | -0.040      |                 |           | Os06t0590700-01 | -3.170    |
| Os02t0688500-01 | 0.661       | -0.395      |                 |           | Os10t0162980-01 | -3.459    |
| Os03t0757500-01 | 0.659       | -0.120      |                 |           | Os03t0702000-03 | -4.807    |
| Os02t0135500-02 | 0.640       | 0.099       |                 |           |                 |           |
| Os01t0956200-01 | 0.617       | 0.224       |                 |           |                 |           |
| Os01t0867600-01 | 0.610       | 0.476       |                 |           |                 |           |
| Os04t0525200-01 | 0.573       | -0.222      |                 |           |                 |           |

|                 |        |        |  |  |  |  |
|-----------------|--------|--------|--|--|--|--|
| Os04t0320700-02 | 0.543  | -0.356 |  |  |  |  |
| Os07t0201800-00 | 0.540  | -1.819 |  |  |  |  |
| Os04t0320700-01 | 0.511  | 0.272  |  |  |  |  |
| Os04t0324100-01 | 0.491  | 0.213  |  |  |  |  |
| Os03t0757600-01 | 0.477  | 0.613  |  |  |  |  |
| Os05t0391600-01 | 0.417  | 0.117  |  |  |  |  |
| Os07t0510400-02 | 0.404  | -0.059 |  |  |  |  |
| Os02t0188000-01 | 0.373  | 0.181  |  |  |  |  |
| Os11t0145200-01 | 0.358  | 0.796  |  |  |  |  |
| Os04t0556400-01 | 0.307  | -1.280 |  |  |  |  |
| Os03t0401300-01 | 0.302  | 0.043  |  |  |  |  |
| Os06t0593800-01 | 0.273  | 0.845  |  |  |  |  |
| Os06t0289200-01 | 0.257  | 0.208  |  |  |  |  |
| Os01t0179600-01 | 0.256  | 0.366  |  |  |  |  |
| Os11t0202500-00 | 0.244  | -0.392 |  |  |  |  |
| Os07t0510400-01 | 0.242  | -0.554 |  |  |  |  |
| Os05t0499600-01 | 0.235  | -0.140 |  |  |  |  |
| Os03t0567600-01 | 0.201  | 0.181  |  |  |  |  |
| Os07t0489300-01 | 0.155  | 1.433  |  |  |  |  |
| Os09t0531900-01 | 0.152  | -0.078 |  |  |  |  |
| Os02t0490500-01 | 0.136  | 0.036  |  |  |  |  |
| Os10t0437000-01 | 0.129  | 0.031  |  |  |  |  |
| Os11t0441500-01 | 0.115  | 0.337  |  |  |  |  |
| Os01t0638000-01 | 0.107  | 0.193  |  |  |  |  |
| Os05t0526800-01 | 0.071  | 0.355  |  |  |  |  |
| Os06t0343600-01 | 0.071  | 0.206  |  |  |  |  |
| Os02t0210800-01 | 0.048  | 0.515  |  |  |  |  |
| Os06t0282000-01 | 0.016  | -0.457 |  |  |  |  |
| Os07t0419500-01 | 0.009  | 0.404  |  |  |  |  |
| Os04t0131900-01 | 0.005  | 0.241  |  |  |  |  |
| Os01t0172000-01 | -0.001 | -0.017 |  |  |  |  |
| Os01t0498300-01 | -0.029 | 0.322  |  |  |  |  |
| Os09t0517900-01 | -0.047 | -0.220 |  |  |  |  |
| Os02t0755500-01 | -0.090 | 1.138  |  |  |  |  |
| Os02t0664200-01 | -0.126 | 0.152  |  |  |  |  |
| Os04t0525100-01 | -0.136 | 0.251  |  |  |  |  |
| Os07t0100300-02 | -0.146 | 0.290  |  |  |  |  |
| Os07t0201500-00 | -0.166 | 0.531  |  |  |  |  |
| Os08t0327100-01 | -0.173 | 0.382  |  |  |  |  |
| Os02t0327700-01 | -0.193 | 0.182  |  |  |  |  |
| Os04t0506000-01 | -0.210 | -0.387 |  |  |  |  |
| Os06t0220500-01 | -0.215 | 0.939  |  |  |  |  |
| Os05t0215300-01 | -0.270 | -0.255 |  |  |  |  |
| Os11t0461200-01 | -0.276 | 0.252  |  |  |  |  |
| Os02t0206700-01 | -0.284 | -0.042 |  |  |  |  |

|                 |        |        |  |  |  |  |
|-----------------|--------|--------|--|--|--|--|
| Os06t0288300-01 | -0.287 | -0.138 |  |  |  |  |
| Os07t0240600-01 | -0.289 | 0.534  |  |  |  |  |
| Os07t0241500-01 | -0.308 | 0.547  |  |  |  |  |
| Os05t0500200-01 | -0.317 | 0.022  |  |  |  |  |
| Os07t0510500-01 | -0.334 | 0.047  |  |  |  |  |
| Os02t0329800-01 | -0.351 | -0.247 |  |  |  |  |
| Os06t0707200-01 | -0.371 | 0.113  |  |  |  |  |
| Os06t0712500-01 | -0.372 | -0.481 |  |  |  |  |
| Os02t0206100-01 | -0.389 | 2.070  |  |  |  |  |
| Os04t0206700-02 | -0.421 | -0.306 |  |  |  |  |
| Os04t0196600-01 | -0.447 | -0.239 |  |  |  |  |
| Os06t0470000-01 | -0.451 | 0.058  |  |  |  |  |
| Os11t0128000-01 | -0.484 | 0.138  |  |  |  |  |
| Os10t0492200-01 | -0.496 | -0.132 |  |  |  |  |
| Os01t0119000-01 | -0.531 | 1.085  |  |  |  |  |
| Os04t0451200-01 | -0.532 | 0.231  |  |  |  |  |
| Os01t0697100-01 | -0.560 | 0.158  |  |  |  |  |
| Os06t0707000-00 | -0.569 | -0.354 |  |  |  |  |
| Os06t0289900-01 | -0.576 | 0.322  |  |  |  |  |
| Os07t0241700-00 | -0.630 | -1.193 |  |  |  |  |
| Os01t0119100-00 | -0.648 | -0.183 |  |  |  |  |
| Os01t0926700-00 | -0.688 | -0.532 |  |  |  |  |
| Os02t0589400-01 | -0.701 | -0.044 |  |  |  |  |
| Os07t0502900-00 | -0.723 | 0.107  |  |  |  |  |
| Os02t0206100-02 | -0.754 | 1.492  |  |  |  |  |
| Os02t0243300-01 | -0.764 | -0.126 |  |  |  |  |
| Os07t0660500-00 | -0.800 | 1.487  |  |  |  |  |
| Os03t0684500-01 | -0.800 | 1.115  |  |  |  |  |
| Os07t0201300-00 | -0.823 | 0.749  |  |  |  |  |
| Os02t0331200-01 | -0.840 | -0.161 |  |  |  |  |
| Os03t0757200-01 | -0.882 | 0.154  |  |  |  |  |
| Os10t0122000-00 | -0.942 | 0.181  |  |  |  |  |
| Os06t0192100-00 | -1.050 | -2.170 |  |  |  |  |
| Os04t0271700-03 | -1.110 | 1.000  |  |  |  |  |
| Os01t0176000-01 | -1.140 | 0.291  |  |  |  |  |
| Os05t0552700-01 | -1.160 | 2.000  |  |  |  |  |
| Os06t0475400-01 | -1.210 | 0.140  |  |  |  |  |
| Os07t0148200-01 | -1.250 | -0.204 |  |  |  |  |
| Os07t0503900-01 | -1.290 | -0.244 |  |  |  |  |
| Os04t0503700-01 | -1.380 | -0.848 |  |  |  |  |
| Os01t0734800-01 | -1.490 | 0.353  |  |  |  |  |
| Os01t0865400-01 | -1.580 | -0.324 |  |  |  |  |
| Os05t0499800-02 | -1.640 | -0.993 |  |  |  |  |
| Os02t0490500-02 | -1.720 | -0.368 |  |  |  |  |
| Os04t0272700-02 | -1.750 | 0.049  |  |  |  |  |

|                          |            |             |                 |           |                 |           |
|--------------------------|------------|-------------|-----------------|-----------|-----------------|-----------|
| Os11t0457300-01          | -2.020     | -4.248      |                 |           |                 |           |
| Os01t0638600-00          | -2.380     | -1.371      |                 |           |                 |           |
| Os02t0331200-02          | -2.730     | -0.301      |                 |           |                 |           |
| Os03t0567600-03          | -3.390     | -0.135      |                 |           |                 |           |
| Os09t0482900-01          | -3.420     | -1.363      |                 |           |                 |           |
| Os02t0135500-01          | -4.060     | -Inf        |                 |           |                 |           |
| Os01t0735900-01          | -4.920     | 0.468       |                 |           |                 |           |
| Os05t0500000-00          | -6.900     | 0.037       |                 |           |                 |           |
| <b>Methyltransferase</b> | 8 ↑ , 28 ↓ | 11 ↑ , 17 ↓ |                 | 2 ↑ , 6 ↓ |                 | 2 ↑ , 2 ↓ |
| Os10t0578600-01          | Inf        | -Inf        | Os02t0725200-02 | -Inf      | Os08t0498600-01 | 2.700     |
| Os11t0557700-02          | -3.630     | 1.363       | Os05t0102000-01 | 2.030     | Os04t0104900-01 | 1.222     |
| Os04t0570800-01          | 5.580      | 0.058       | Os09t0344500-01 | 1.070     | Os09t0445100-00 | 0.737     |
| Os11t0557700-01          | 1.820      | -0.823      | Os02t0804300-02 | 0.692     | Os07t0640000-01 | 0.387     |
| Os06t0152400-01          | 1.690      | 1.170       | Os10t0181600-01 | 0.664     | Os11t0305400-00 | 0.199     |
| Os07t0206700-02          | 1.450      | 2.000       | Os06t0242900-01 | 0.592     | Os04t0176200-00 | 0.034     |
| Os04t0645500-01          | 1.080      | -0.244      | Os01t0712600-00 | 0.370     | Os11t0259700-01 | 0.000     |
| Os09t0307800-02          | 1.020      | 2.503       | Os05t0324200-01 | 0.370     | Os01t0225500-00 | -0.170    |
| Os11t0256900-01          | 1.020      | 1.402       | Os03t0685100-01 | 0.318     | Os02t0120300-01 | -0.290    |
| Os01t0828300-01          | 0.998      | -0.138      | Os05t0324100-01 | 0.080     | Os10t0104900-01 | -0.290    |
| Os09t0474400-00          | 0.884      | -0.931      | Os07t0464200-00 | 0.055     | Os08t0113400-01 | -0.807    |
| Os03t0824200-01          | 0.822      | 0.342       | Os09t0411650-01 | -0.058    | Os06t0474300-01 | -1.000    |
| Os01t0846600-01          | 0.755      | -1.059      | Os03t0729700-01 | -0.145    | Os10t0422200-02 | -1.222    |
| Os06t0646000-02          | 0.729      | 1.379       | Os03t0775000-00 | -0.307    |                 |           |
| Os04t0481400-01          | 0.717      | 0.723       | Os07t0179300-00 | -0.367    |                 |           |
| Os05t0564100-01          | 0.661      | 0.415       | Os02t0137600-01 | -0.415    |                 |           |
| Os06t0153900-01          | 0.661      | 0.415       | Os01t0193600-01 | -0.800    |                 |           |
| Os05t0497600-01          | 0.660      | 0.148       | Os12t0441600-00 | -0.852    |                 |           |
| Os04t0319600-01          | 0.567      | 0.534       | Os05t0515500-01 | -0.853    |                 |           |
| Os01t0716500-01          | 0.537      | -0.245      | Os05t0497675-01 | -0.903    |                 |           |
| Os01t0535900-01          | 0.535      | 0.095       | Os10t0357800-01 | -0.916    |                 |           |
| Os08t0517600-02          | 0.529      | 0.881       | Os06t0314600-01 | -1.050    |                 |           |
| Os04t0481300-01          | 0.479      | -0.322      | Os07t0463600-00 | -1.220    |                 |           |
| Os04t0175600-01          | 0.473      | -0.128      | Os01t0920300-02 | -1.530    |                 |           |
| Os12t0612500-01          | 0.465      | -0.241      | Os07t0462800-00 | -1.920    |                 |           |
| Os02t0593900-01          | 0.438      | -0.327      | Os10t0118000-01 | -2.720    |                 |           |
| Os10t0392500-00          | 0.419      | 1.354       |                 |           |                 |           |
| Os12t0203100-01          | 0.396      | -0.415      |                 |           |                 |           |
| Os02t0612100-01          | 0.370      | 0.314       |                 |           |                 |           |
| Os07t0667400-01          | 0.370      | -0.130      |                 |           |                 |           |
| Os06t0244000-01          | 0.341      | 0.604       |                 |           |                 |           |
| Os07t0414200-01          | 0.321      | 0.415       |                 |           |                 |           |
| Os03t0738400-03          | 0.274      | -0.092      |                 |           |                 |           |
| Os05t0224900-01          | 0.246      | 0.290       |                 |           |                 |           |
| Os02t0672600-01          | 0.242      | 0.114       |                 |           |                 |           |
| Os06t0646000-01          | 0.219      | 0.363       |                 |           |                 |           |

|                 |        |        |  |  |  |  |
|-----------------|--------|--------|--|--|--|--|
| Os03t0110800-01 | 0.213  | 0.419  |  |  |  |  |
| Os01t0883900-01 | 0.198  | 0.387  |  |  |  |  |
| Os08t0557000-01 | 0.153  | 0.138  |  |  |  |  |
| Os06t0101100-01 | 0.138  | -0.585 |  |  |  |  |
| Os01t0874900-01 | 0.131  | -0.095 |  |  |  |  |
| Os12t0607000-02 | 0.083  | -0.242 |  |  |  |  |
| Os05t0224800-01 | 0.048  | 1.147  |  |  |  |  |
| Os03t0738400-01 | 0.015  | 0.447  |  |  |  |  |
| Os02t0761900-02 | 0.012  | 0.107  |  |  |  |  |
| Os06t0128100-01 | -0.009 | -0.394 |  |  |  |  |
| Os02t0675700-01 | -0.010 | -0.352 |  |  |  |  |
| Os03t0379100-01 | -0.035 | -0.101 |  |  |  |  |
| Os02t0761900-01 | -0.049 | 0.162  |  |  |  |  |
| Os08t0154000-01 | -0.054 | 0.485  |  |  |  |  |
| Os07t0656800-01 | -0.061 | 0.105  |  |  |  |  |
| Os08t0498400-02 | -0.064 | -2.256 |  |  |  |  |
| Os06t0152300-01 | -0.068 | -0.231 |  |  |  |  |
| Os07t0206700-01 | -0.082 | -0.017 |  |  |  |  |
| Os06t0138600-01 | -0.090 | -0.248 |  |  |  |  |
| Os02t0121200-01 | -0.092 | 0.274  |  |  |  |  |
| Os06t0140100-01 | -0.107 | 0.052  |  |  |  |  |
| Os11t0260100-00 | -0.116 | 0.181  |  |  |  |  |
| Os02t0744100-01 | -0.125 | -0.160 |  |  |  |  |
| Os08t0506500-00 | -0.129 | 0.222  |  |  |  |  |
| Os02t0755000-01 | -0.131 | -0.285 |  |  |  |  |
| Os04t0602900-02 | -0.137 | -2.032 |  |  |  |  |
| Os01t0772150-00 | -0.145 | -0.237 |  |  |  |  |
| Os07t0692401-00 | -0.159 | 0.285  |  |  |  |  |
| Os06t0236900-01 | -0.161 | -0.067 |  |  |  |  |
| Os07t0247100-01 | -0.172 | 0.447  |  |  |  |  |
| Os05t0105000-01 | -0.211 | -0.123 |  |  |  |  |
| Os04t0606900-01 | -0.215 | 0.848  |  |  |  |  |
| Os04t0677066-00 | -0.215 | 0.059  |  |  |  |  |
| Os02t0701600-01 | -0.218 | 0.146  |  |  |  |  |
| Os02t0823400-01 | -0.234 | 0.186  |  |  |  |  |
| Os07t0671700-01 | -0.241 | 0.489  |  |  |  |  |
| Os10t0489100-01 | -0.242 | 0.507  |  |  |  |  |
| Os03t0775200-01 | -0.259 | -0.031 |  |  |  |  |
| Os08t0498400-01 | -0.263 | -0.525 |  |  |  |  |
| Os12t0607000-01 | -0.291 | -1.392 |  |  |  |  |
| Os10t0510400-02 | -0.295 | -0.853 |  |  |  |  |
| Os12t0409000-01 | -0.301 | 0.020  |  |  |  |  |
| Os04t0623800-01 | -0.329 | 0.012  |  |  |  |  |
| Os05t0429000-01 | -0.367 | 0.573  |  |  |  |  |
| Os01t0883900-02 | -0.367 | -0.692 |  |  |  |  |

|                 |        |        |  |  |  |  |
|-----------------|--------|--------|--|--|--|--|
| Os11t0455800-02 | -0.369 | -1.000 |  |  |  |  |
| Os02t0290400-01 | -0.375 | 0.146  |  |  |  |  |
| Os03t0243800-00 | -0.408 | 0.363  |  |  |  |  |
| Os01t0920300-01 | -0.415 | -0.193 |  |  |  |  |
| Os04t0507800-01 | -0.419 | 1.254  |  |  |  |  |
| Os06t0105500-01 | -0.427 | 0.100  |  |  |  |  |
| Os02t0804300-01 | -0.478 | 0.118  |  |  |  |  |
| Os06t0132400-01 | -0.483 | -1.700 |  |  |  |  |
| Os08t0119500-01 | -0.510 | -1.263 |  |  |  |  |
| Os09t0518900-01 | -0.513 | -0.794 |  |  |  |  |
| Os08t0411200-01 | -0.517 | 0.807  |  |  |  |  |
| Os02t0725600-01 | -0.523 | -0.528 |  |  |  |  |
| Os01t0722800-00 | -0.537 | 0.256  |  |  |  |  |
| Os02t0750500-01 | -0.574 | -0.700 |  |  |  |  |
| Os11t0455800-01 | -0.575 | -0.163 |  |  |  |  |
| Os07t0297300-00 | -0.589 | -0.273 |  |  |  |  |
| Os03t0780900-01 | -0.590 | -0.188 |  |  |  |  |
| Os03t0147700-01 | -0.592 | 2.379  |  |  |  |  |
| Os06t0103900-01 | -0.630 | -0.337 |  |  |  |  |
| Os10t0569300-01 | -0.652 | 0.429  |  |  |  |  |
| Os08t0157500-01 | -0.664 | -0.237 |  |  |  |  |
| Os09t0415700-01 | -0.667 | -0.807 |  |  |  |  |
| Os10t0510400-01 | -0.685 | -0.096 |  |  |  |  |
| Os05t0567400-01 | -0.708 | -0.046 |  |  |  |  |
| Os08t0157500-02 | -0.717 | -2.734 |  |  |  |  |
| Os06t0153900-02 | -0.730 | 3.059  |  |  |  |  |
| Os03t0786700-01 | -0.800 | 0.030  |  |  |  |  |
| Os12t0613200-02 | -0.806 | 0.485  |  |  |  |  |
| Os08t0498100-01 | -0.823 | -0.485 |  |  |  |  |
| Os03t0822300-01 | -0.893 | -0.617 |  |  |  |  |
| Os02t0556400-01 | -0.903 | -0.704 |  |  |  |  |
| Os09t0481400-01 | -0.930 | -0.075 |  |  |  |  |
| Os03t0174600-02 | -Inf   | -1.222 |  |  |  |  |
| Os05t0378800-02 | -1.010 | -0.093 |  |  |  |  |
| Os03t0136200-01 | -1.010 | -0.323 |  |  |  |  |
| Os01t0701700-01 | -1.090 | -1.823 |  |  |  |  |
| Os03t0221200-01 | -1.100 | -0.571 |  |  |  |  |
| Os06t0165800-01 | -1.100 | -1.027 |  |  |  |  |
| Os01t0742000-01 | -1.190 | -1.170 |  |  |  |  |
| Os07t0569500-01 | -1.220 | 0.294  |  |  |  |  |
| Os06t0162600-01 | -1.230 | -0.044 |  |  |  |  |
| Os05t0141400-01 | -1.270 | 0.534  |  |  |  |  |
| Os03t0833200-01 | -1.370 | -0.807 |  |  |  |  |
| Os01t0631200-01 | -1.390 | -0.406 |  |  |  |  |
| Os02t0139200-01 | -1.410 | -0.300 |  |  |  |  |

|                  |                 |                 |                 |                   |                 |                 |
|------------------|-----------------|-----------------|-----------------|-------------------|-----------------|-----------------|
| Os07t0164000-01  | -1.480          | -0.585          |                 |                   |                 |                 |
| Os05t0515600-01  | -1.630          | -1.280          |                 |                   |                 |                 |
| Os06t0142800-01  | -1.730          | -1.093          |                 |                   |                 |                 |
| Os04t0379300-01  | -1.760          | 0.796           |                 |                   |                 |                 |
| Os09t0359900-01  | -1.800          | -0.222          |                 |                   |                 |                 |
| Os01t0695100-01  | -1.840          | -0.078          |                 |                   |                 |                 |
| Os04t0570800-02  | -2.010          | 0.180           |                 |                   |                 |                 |
| Os10t0578600-02  | -2.220          | -2.459          |                 |                   |                 |                 |
| Os09t0359800-01  | -2.410          | -0.471          |                 |                   |                 |                 |
| Os10t0522000-01  | -2.420          | -0.313          |                 |                   |                 |                 |
| Os05t0548900-01  | -2.890          | -1.072          |                 |                   |                 |                 |
| Os03t0355800-02  | -3.060          | -0.700          |                 |                   |                 |                 |
| Os03t0566600-01  | -3.090          | 0.392           |                 |                   |                 |                 |
| Os06t0329900-01  | -3.810          | 0.190           |                 |                   |                 |                 |
| <b>GST</b>       | <b>2 ↑, 4 ↓</b> | <b>0 ↑, 2 ↓</b> |                 | <b>1 ↑, 2 ↓</b>   |                 | <b>0 ↑, 1 ↓</b> |
| Os10t0525800-00  | -Inf            | -1.222          | Os10t0528300-01 | 1.140             | Os06t0227500-00 | 0.848           |
| Os10t0529400-01  | 1.510           | -0.460          | Os10t0529800-00 | 0.660             | Os01t0692100-01 | 0.784           |
| Os03t0135100-01  | 1.090           | 0.147           | Os11t0588300-02 | 0.408             | Os02t0564000-01 | 0.481           |
| Os01t0369700-01  | 0.543           | -0.822          | Os11t0588300-01 | -0.249            | Os08t0550500-01 | 0.363           |
| Os01t0764000-01  | 0.494           | 0.030           | Os04t0270100-03 | -0.367            | Os06t0168000-01 | 0.315           |
| Os01t0369700-03  | 0.460           | 0.182           | Os10t0527800-01 | -0.515            | Os01t0949800-01 | 0.254           |
| Os07t0468100-01  | 0.297           | 0.000           | Os10t0528900-01 | -0.844            | Os10t0530600-01 | 0.222           |
| Os03t0134900-01  | 0.080           | 0.108           | Os10t0529300-01 | -1.050            | Os11t0245100-01 | 0.218           |
| Os03t0135300-01  | 0.077           | -0.267          | Os10t0525400-03 | -2.250            | Os02t0814800-01 | 0.206           |
| Os10t0531400-01  | 0.047           | 0.799           |                 |                   | Os10t0527601-00 | 0.206           |
| Os05t0412800-01  | 0.007           | -0.457          |                 |                   | Os03t0595600-00 | 0.115           |
| Os01t0949750-00  | -0.059          | -0.011          |                 |                   | Os10t0530200-01 | -0.030          |
| Os12t0210200-01  | -0.061          | -0.234          |                 |                   | Os01t0949700-01 | -0.032          |
| Os10t0543800-00  | -0.116          | -0.065          |                 |                   | Os04t0435500-01 | -0.239          |
| Os03t0135200-01  | -0.133          | -0.152          |                 |                   | Os10t0528400-01 | -0.255          |
| Os10t0528100-01  | -0.151          | -0.286          |                 |                   | Os10t0481300-01 | -0.503          |
| Os12t0210300-01  | -0.272          | 0.318           |                 |                   | Os02t0319300-01 | -0.529          |
| Os10t0368100-01  | -0.273          | 0.807           |                 |                   | Os01t0558100-01 | -0.807          |
| Os10t0525400-01  | -0.351          | 0.000           |                 |                   | Os01t0950000-01 | -0.883          |
| Os01t0764000-03  | -0.369          | -0.189          |                 |                   | Os10t0528200-01 | -1.531          |
| Os07t0468100-02  | -0.469          | -0.415          |                 |                   |                 |                 |
| Os09t0467200-01  | -0.566          | -0.301          |                 |                   |                 |                 |
| Os01t0692000-01  | -0.952          | 0.737           |                 |                   |                 |                 |
| Os10t0530900-01  | -1.160          | -0.957          |                 |                   |                 |                 |
| Os12t0123200-01  | -1.770          | -1.000          |                 |                   |                 |                 |
| Os07t0168300-01  | -2.290          | -0.727          |                 |                   |                 |                 |
| <b>Hydrolase</b> | <b>3 ↑, 2 ↓</b> | <b>1 ↑, 3 ↓</b> |                 | <b>16 ↑, 11 ↓</b> |                 | <b>6 ↑, 9 ↓</b> |
| Os03t0805400-03  | Inf             | -7.098          | Os01t0215700-01 | -3.500            | Os01t0595600-01 | 0.988           |
| Os05t0429500-01  | -2.590          | -3.954          | Os01t0276500-02 | -1.900            | Os01t0636400-01 | -1.934          |
| Os06t0214800-01  | -1.670          | -0.994          | Os02t0655600-01 | 2.230             | Os01t0934700-01 | -2.585          |



|                        |             |            |                 |           |                 |           |
|------------------------|-------------|------------|-----------------|-----------|-----------------|-----------|
| Os08t0473900-01        | 6.620       | 3.807      | Os02t0816100-02 | -2.060    | Os03t0437600-02 | 7.017     |
| Os11t0700900-01        | Inf         | -2.524     | Os03t0258200-01 | 2.230     | Os03t0669300-03 | Inf       |
|                        |             |            | Os03t0722500-02 | -3.250    | Os03t0826600-02 | -4.816    |
|                        |             |            | Os04t0513900-01 | 1.680     | Os03t0829200-01 | 1.611     |
|                        |             |            | Os05t0406100-01 | -1.760    | Os04t0412300-02 | -4.129    |
|                        |             |            | Os05t0429500-02 | -2.480    | Os05t0571100-02 | -Inf      |
|                        |             |            | Os05t0517500-02 | -4.750    | Os06t0694200-01 | -4.129    |
|                        |             |            | Os05t0542200-01 | 2.540     | Os07t0162600-02 | 0.991     |
|                        |             |            | Os05t0542200-02 | 2.180     | Os08t0110000-01 | -2.423    |
|                        |             |            | Os06t0179000-01 | -1.630    | Os08t0475100-01 | -1.581    |
|                        |             |            | Os06t0184300-03 | 2.490     | Os10t0160100-01 | -2.313    |
|                        |             |            | Os06t0306600-01 | 1.780     | Os10t0160100-02 | 2.059     |
|                        |             |            | Os07t0539100-02 | 3.120     | Os10t0476700-03 | -3.544    |
|                        |             |            | Os07t0565700-02 | Inf       | Os10t0493600-01 | 1.361     |
|                        |             |            | Os07t0608300-02 | 3.930     | Os11t0384789-02 | 7.017     |
|                        |             |            | Os08t0445700-01 | 1.430     |                 |           |
|                        |             |            | Os08t0473800-01 | Inf       |                 |           |
|                        |             |            | Os09t0511600-03 | 2.160     |                 |           |
|                        |             |            | Os11t0132600-01 | -Inf      |                 |           |
|                        |             |            | Os11t0239500-01 | 2.350     |                 |           |
|                        |             |            | Os11t0439600-01 | -1.600    |                 |           |
|                        |             |            | Os11t0702200-01 | Inf       |                 |           |
|                        |             |            | Os11t0704600-03 | -4.090    |                 |           |
|                        |             |            | Os12t0566700-02 | 7.980     |                 |           |
| <b>Acyltransferase</b> | 0 ↑ , 1 ↓   | 0 ↑ , 1 ↓  |                 | 1 ↑ , 4 ↓ |                 |           |
| Os03t0232800-02        | -2.230      | -Inf       | Os02t0114400-00 | 1.550     |                 |           |
|                        |             |            | Os02t0590200-01 | -1.520    |                 |           |
|                        |             |            | Os02t0590400-03 | -4.480    |                 |           |
|                        |             |            | Os03t0832800-01 | -Inf      |                 |           |
|                        |             |            | Os03t0832800-03 | -Inf      |                 |           |
| <b>S/TPK</b>           | 21 ↑ , 24 ↓ | 22 ↑ , 7 ↓ |                 | 1 ↑ , 9 ↓ |                 | 0 ↑ , 3 ↓ |
| Os01t0138400-01        | 0.562       | 0.792      | Os10t0561500-01 | -0.537    | Os04t0634000-01 | 0.949     |
| Os01t0170300-01        | -0.837      | -0.243     | Os10t0548700-01 | -2.690    | Os11t0133500-00 | 0.881     |
| Os01t0223900-01        | -0.045      | -0.450     | Os10t0531700-00 | -0.910    | Os11t0664000-01 | 0.459     |
| Os01t0224000-00        | 2.100       | 0.830      | Os09t0482640-01 | -0.548    | Os12t0614600-01 | 0.279     |
| Os01t0259200-01        | 0.040       | 2.082      | Os07t0494800-01 | -0.800    | Os07t0686800-01 | 0.247     |
| Os01t0267800-00        | 0.107       | 1.032      | Os04t0649700-01 | 0.884     | Os10t0342300-01 | 0.000     |
| Os01t0292200-01        | -0.777      | 0.432      | Os03t0841100-01 | 0.054     | Os12t0125300-01 | 0.000     |
| Os01t0514700-01        | 1.140       | -0.495     | Os03t0828800-01 | -0.133    | Os11t0225000-01 | -0.126    |
| Os01t0587400-01        | -1.910      | 0.040      | Os03t0424200-01 | -0.268    | Os12t0608500-01 | -0.181    |
| Os01t0602800-01        | -0.513      | -0.209     | Os03t0268200-01 | -1.700    | Os08t0376600-01 | -0.309    |
| Os01t0607900-01        | -0.142      | -0.417     | Os02t0218400-01 | -1.370    | Os06t0575400-01 | -0.459    |
| Os01t0621600-01        | -0.534      | -0.155     | Os02t0111600-01 | -1.020    | Os11t0691650-00 | -0.778    |
| Os01t0670100-01        | -0.215      | -0.607     | Os01t0927500-01 | -3.630    | Os08t0117700-01 | -1.000    |
| Os01t0699100-01        | 0.488       | -0.826     | Os01t0824600-01 | 0.477     | Os01t0784200-00 | -1.087    |

|                 |        |        |                 |        |                 |        |
|-----------------|--------|--------|-----------------|--------|-----------------|--------|
| Os01t0699400-01 | 1.390  | -0.173 | Os01t0784700-00 | -1.540 | Os12t0102500-02 | -4.524 |
| Os01t0699500-01 | 0.355  | -0.453 | Os01t0783800-01 | -1.090 |                 |        |
| Os01t0699600-01 | 0.215  | -0.578 | Os01t0581400-01 | -1.130 |                 |        |
| Os01t0748600-02 | 0.626  | 1.092  | Os01t0206700-03 | 1.000  |                 |        |
| Os01t0889900-01 | -0.231 | 0.000  | Os01t0206700-01 | -1.400 |                 |        |
| Os01t0927500-02 | -0.215 | -0.893 |                 |        |                 |        |
| Os01t0929200-01 | -0.282 | -0.617 |                 |        |                 |        |
| Os02t0120100-01 | 2.880  | 1.881  |                 |        |                 |        |
| Os02t0153700-01 | 0.007  | -0.206 |                 |        |                 |        |
| Os02t0161000-01 | 0.169  | 0.138  |                 |        |                 |        |
| Os02t0174200-01 | 0.608  | 0.098  |                 |        |                 |        |
| Os02t0190500-01 | -0.853 | 0.000  |                 |        |                 |        |
| Os02t0193600-01 | 0.855  | -0.392 |                 |        |                 |        |
| Os02t0655800-01 | 0.307  | 0.303  |                 |        |                 |        |
| Os02t0655800-02 | -1.810 | -1.426 |                 |        |                 |        |
| Os02t0681700-01 | -0.618 | 0.154  |                 |        |                 |        |
| Os02t0767400-01 | 0.884  | -0.129 |                 |        |                 |        |
| Os02t0819600-01 | 0.760  | 0.154  |                 |        |                 |        |
| Os02t0819600-02 | -Inf   | -0.121 |                 |        |                 |        |
| Os03t0113000-01 | -0.159 | -0.583 |                 |        |                 |        |
| Os03t0113000-02 | -1.490 | -0.325 |                 |        |                 |        |
| Os03t0114300-01 | 0.464  | 1.372  |                 |        |                 |        |
| Os03t0122000-01 | 0.723  | -0.107 |                 |        |                 |        |
| Os03t0127700-02 | -0.367 | -0.346 |                 |        |                 |        |
| Os03t0130900-01 | -0.546 | 0.693  |                 |        |                 |        |
| Os03t0130900-02 | -0.258 | -0.541 |                 |        |                 |        |
| Os03t0221700-02 | -0.857 | -0.219 |                 |        |                 |        |
| Os03t0225100-02 | 0.197  | -0.194 |                 |        |                 |        |
| Os03t0227900-00 | 0.794  | -0.381 |                 |        |                 |        |
| Os03t0241600-01 | -0.838 | 0.429  |                 |        |                 |        |
| Os03t0241600-02 | -Inf   | -1.044 |                 |        |                 |        |
| Os03t0281466-01 | -0.167 | 0.246  |                 |        |                 |        |
| Os03t0289100-01 | 0.537  | 0.391  |                 |        |                 |        |
| Os03t0295600-01 | -2.370 | 1.585  |                 |        |                 |        |
| Os03t0295600-02 | 0.440  | -0.512 |                 |        |                 |        |
| Os03t0319400-01 | -0.200 | -1.379 |                 |        |                 |        |
| Os03t0339900-01 | -3.410 | 1.125  |                 |        |                 |        |
| Os03t0407900-01 | -0.532 | 0.537  |                 |        |                 |        |
| Os03t0556600-01 | -1.370 | -0.214 |                 |        |                 |        |
| Os03t0634400-01 | -2.600 | -0.320 |                 |        |                 |        |
| Os03t0711300-01 | 0.723  | -0.710 |                 |        |                 |        |
| Os03t0764300-01 | 0.020  | 0.220  |                 |        |                 |        |
| Os03t0825300-02 | 0.107  | 2.263  |                 |        |                 |        |
| Os03t0825300-03 | -0.215 | -0.801 |                 |        |                 |        |
| Os03t0838100-01 | 0.428  | -0.109 |                 |        |                 |        |

|                 |        |        |  |  |  |  |
|-----------------|--------|--------|--|--|--|--|
| Os03t0838100-02 | -0.370 | -0.504 |  |  |  |  |
| Os03t0838100-04 | -1.190 | 1.562  |  |  |  |  |
| Os03t0839900-01 | -0.060 | 0.744  |  |  |  |  |
| Os03t0839900-02 | -0.730 | -0.464 |  |  |  |  |
| Os04t0103500-01 | 0.626  | 1.000  |  |  |  |  |
| Os04t0103700-01 | 0.955  | 1.000  |  |  |  |  |
| Os04t0368000-01 | -1.950 | -0.285 |  |  |  |  |
| Os04t0463000-01 | 0.767  | -0.036 |  |  |  |  |
| Os04t0472500-00 | -0.505 | -0.497 |  |  |  |  |
| Os04t0487200-01 | 0.277  | 0.056  |  |  |  |  |
| Os04t0540900-01 | -0.664 | -0.658 |  |  |  |  |
| Os04t0584100-01 | 1.950  | -0.166 |  |  |  |  |
| Os04t0599000-02 | -0.013 | -0.126 |  |  |  |  |
| Os04t0616600-01 | -2.220 | -3.907 |  |  |  |  |
| Os04t0649700-02 | -1.740 | -0.415 |  |  |  |  |
| Os05t0127300-01 | 0.531  | -0.427 |  |  |  |  |
| Os05t0136200-01 | 1.030  | 1.322  |  |  |  |  |
| Os05t0136200-02 | 1.530  | 0.350  |  |  |  |  |
| Os05t0165900-01 | -0.396 | 3.459  |  |  |  |  |
| Os05t0166300-01 | 0.463  | 0.000  |  |  |  |  |
| Os05t0169600-01 | 0.955  | -0.492 |  |  |  |  |
| Os05t0440800-01 | -0.232 | 0.632  |  |  |  |  |
| Os05t0466900-01 | 0.048  | -0.497 |  |  |  |  |
| Os05t0480000-01 | 0.392  | 0.541  |  |  |  |  |
| Os05t0480400-01 | 0.037  | 0.428  |  |  |  |  |
| Os05t0498900-01 | 0.312  | 0.926  |  |  |  |  |
| Os05t0519200-02 | 0.401  | 0.446  |  |  |  |  |
| Os05t0530500-02 | 0.314  | 0.347  |  |  |  |  |
| Os05t0545300-01 | 2.620  | -0.322 |  |  |  |  |
| Os05t0545400-01 | 0.961  | 0.000  |  |  |  |  |
| Os05t0550800-01 | -0.215 | -0.250 |  |  |  |  |
| Os05t0588300-01 | -0.420 | -0.042 |  |  |  |  |
| Os06t0181200-01 | 0.460  | 0.233  |  |  |  |  |
| Os06t0202900-01 | -0.032 | -0.155 |  |  |  |  |
| Os06t0486400-01 | -0.266 | 0.399  |  |  |  |  |
| Os06t0494100-01 | 0.429  | 0.254  |  |  |  |  |
| Os06t0509100-01 | 0.547  | 0.848  |  |  |  |  |
| Os06t0557100-01 | 0.103  | 0.337  |  |  |  |  |
| Os06t0557100-02 | 0.842  | -1.784 |  |  |  |  |
| Os06t0574200-01 | 0.511  | 0.403  |  |  |  |  |
| Os06t0602500-01 | -0.515 | 1.459  |  |  |  |  |
| Os06t0667000-01 | -0.161 | -0.257 |  |  |  |  |
| Os06t0690200-01 | 0.200  | 0.251  |  |  |  |  |
| Os06t0714900-01 | -0.734 | -1.070 |  |  |  |  |
| Os06t0714900-02 | 2.510  | 1.057  |  |  |  |  |

|                 |        |        |  |  |  |  |
|-----------------|--------|--------|--|--|--|--|
| Os06t0717200-01 | -0.291 | 0.113  |  |  |  |  |
| Os07t0134600-01 | 0.141  | -0.016 |  |  |  |  |
| Os07t0150700-01 | -0.045 | -0.038 |  |  |  |  |
| Os07t0409900-01 | -0.215 | -0.585 |  |  |  |  |
| Os07t0471000-01 | 0.143  | 0.922  |  |  |  |  |
| Os07t0472400-01 | -0.952 | -0.678 |  |  |  |  |
| Os07t0534700-01 | -2.220 | 0.765  |  |  |  |  |
| Os07t0537500-01 | 1.470  | 0.381  |  |  |  |  |
| Os07t0538200-01 | 2.380  | 0.271  |  |  |  |  |
| Os07t0538200-02 | 1.500  | 0.249  |  |  |  |  |
| Os07t0540100-01 | 0.045  | 0.358  |  |  |  |  |
| Os07t0553633-01 | -1.130 | 1.222  |  |  |  |  |
| Os07t0678600-01 | 0.514  | -0.105 |  |  |  |  |
| Os08t0138700-01 | -2.130 | -0.181 |  |  |  |  |
| Os08t0200500-01 | -0.293 | -1.000 |  |  |  |  |
| Os08t0224100-03 | -1.070 | Inf    |  |  |  |  |
| Os08t0249100-01 | -1.630 | -0.070 |  |  |  |  |
| Os08t0276400-01 | -0.070 | -0.148 |  |  |  |  |
| Os08t0453800-00 | -Inf   | 0.107  |  |  |  |  |
| Os08t0484600-01 | 1.510  | 0.454  |  |  |  |  |
| Os08t0491200-01 | 0.337  | -0.303 |  |  |  |  |
| Os08t0506400-01 | -0.952 | -0.500 |  |  |  |  |
| Os08t0564700-01 | -0.816 | -0.015 |  |  |  |  |
| Os09t0237600-01 | -1.590 | 0.110  |  |  |  |  |
| Os09t0372800-01 | 1.170  | 0.878  |  |  |  |  |
| Os09t0372800-02 | -3.320 | 0.049  |  |  |  |  |
| Os09t0400500-01 | -0.157 | -0.413 |  |  |  |  |
| Os09t0454900-01 | 1.170  | 0.437  |  |  |  |  |
| Os09t0544300-01 | 0.362  | 0.524  |  |  |  |  |
| Os09t0562600-01 | -0.424 | -0.585 |  |  |  |  |
| Os09t0566550-01 | 0.023  | 1.720  |  |  |  |  |
| Os09t0570000-01 | -0.408 | 0.138  |  |  |  |  |
| Os10t0100500-01 | -0.083 | 0.096  |  |  |  |  |
| Os10t0101000-01 | -0.039 | 0.085  |  |  |  |  |
| Os10t0112700-01 | -0.408 | 0.308  |  |  |  |  |
| Os10t0153900-01 | 0.785  | 3.585  |  |  |  |  |
| Os10t0180800-01 | 2.050  | 1.170  |  |  |  |  |
| Os10t0431900-01 | -1.480 | 0.267  |  |  |  |  |
| Os10t0431900-02 | 4.180  | -0.282 |  |  |  |  |
| Os10t0468500-01 | 1.430  | -0.022 |  |  |  |  |
| Os10t0497600-01 | 0.218  | 0.401  |  |  |  |  |
| Os10t0497600-02 | 0.029  | -0.152 |  |  |  |  |
| Os10t0516200-00 | -1.670 | -0.198 |  |  |  |  |
| Os10t0518800-01 | 0.205  | 0.315  |  |  |  |  |
| Os10t0580300-01 | 0.215  | 0.383  |  |  |  |  |

|                                       |                           |          |                           |                           |                          |                           |
|---------------------------------------|---------------------------|----------|---------------------------|---------------------------|--------------------------|---------------------------|
| Os11t0113700-01                       | 3.330                     | 1.136    |                           |                           |                          |                           |
| Os11t0113700-02                       | Inf                       | 1.628    |                           |                           |                          |                           |
| Os11t0150700-00                       | 0.665                     | -1.459   |                           |                           |                          |                           |
| Os11t0233800-01                       | -0.367                    | 0.000    |                           |                           |                          |                           |
| Os12t0102500-01                       | 0.007                     | 1.300    |                           |                           |                          |                           |
| Os12t0113500-02                       | Inf                       | 0.856    |                           |                           |                          |                           |
| Os12t0235700-00                       | -3.240                    | -0.037   |                           |                           |                          |                           |
| Os12t0424700-00                       | -0.355                    | 0.280    |                           |                           |                          |                           |
| Os12t0527700-01                       | 0.296                     | 0.688    |                           |                           |                          |                           |
| Os12t0632900-01                       | -0.786                    | 0.205    |                           |                           |                          |                           |
| <b>Gene both in shoot and root</b>    |                           |          | <b>Gene only in shoot</b> |                           | <b>Gene only in root</b> |                           |
| Gene ID                               | Log <sub>2</sub> (IPU/CK) |          | Gene ID                   | Log <sub>2</sub> (IPU/CK) | Gene ID                  | Log <sub>2</sub> (IPU/CK) |
|                                       | Shoot                     | Root     |                           | Shoot                     |                          | Root                      |
| <b>Antioxidase</b>                    |                           |          |                           |                           |                          |                           |
| <b>Laccase</b>                        | 2 ↑, 2 ↓                  | 1 ↑, 3 ↓ |                           | 2 ↑, 1 ↓                  |                          | 0 ↑, 2 ↓                  |
| Os01t0850700-01                       | 1.290                     | 1.379    | Os03t0273200-02           | Inf                       | Os01t0850550-00          | 0.654                     |
| Os12t0257600-00                       | 1.240                     | -1.000   | Os05t0458500-00           | 1.590                     | Os12t0259800-00          | 0.203                     |
| Os01t0827300-01                       | 0.370                     | -0.403   | Os11t0641800-01           | -1.340                    | Os01t0850800-00          | -0.080                    |
| Os01t0842500-01                       | 0.200                     | -0.732   |                           |                           | Os01t0634500-00          | -0.181                    |
| Os05t0458600-01                       | -0.361                    | -0.363   |                           |                           | Os11t0108700-00          | -0.585                    |
| Os03t0273200-01                       | -0.478                    | -3.524   |                           |                           | Os03t0297900-00          | -0.646                    |
| Os01t0842400-01                       | -1.730                    | -0.485   |                           |                           | Os11t0696900-01          | -1.000                    |
| Os11t0708100-01                       | -2.220                    | -1.064   |                           |                           | Os12t0108000-01          | -1.830                    |
| <b>Monodehydroascorbate reductase</b> | 1 ↑, 0 ↓                  |          |                           |                           |                          |                           |
| Os02t0707100-02                       | 1.660                     | 0.547    |                           |                           |                          |                           |
| Os02t0707100-01                       | -0.178                    | 0.206    |                           |                           |                          |                           |
| Os08t0557600-01                       | 0.534                     | 0.004    |                           |                           |                          |                           |
| Os09t0567300-01                       | -0.253                    | -0.070   |                           |                           |                          |                           |
| Os02t0707000-00                       | 0.370                     | -0.913   |                           |                           |                          |                           |
| <b>SOD</b>                            | 1 ↑, 0 ↓                  |          |                           |                           |                          | 0 ↑, 0 ↓                  |
| Os01t0284500-01                       | 1.870                     | -0.341   |                           |                           | Os12t0613250-00          | 0.300                     |
| Os07t0665200-01                       | 0.381                     | 0.144    |                           |                           |                          |                           |
| Os04t0573200-01                       | 0.376                     | -0.965   |                           |                           |                          |                           |
| Os03t0219200-01                       | 0.360                     | 0.195    |                           |                           |                          |                           |
| Os03t0351500-01                       | 0.058                     | 0.046    |                           |                           |                          |                           |
| Os06t0143000-01                       | -0.021                    | 0.861    |                           |                           |                          |                           |
| Os08t0561700-01                       | -0.142                    | -0.152   |                           |                           |                          |                           |
| Os05t0323900-01                       | -0.191                    | -0.127   |                           |                           |                          |                           |
| Os06t0115400-01                       | -0.320                    | -0.181   |                           |                           |                          |                           |
| Os01t0249200-01                       | -0.760                    | -0.660   |                           |                           |                          |                           |
| Os04t0573200-03                       | -2.090                    | -0.075   |                           |                           |                          |                           |
| <b>Peroxidase</b>                     | 15 ↑, 18 ↓                | 2 ↑, 9 ↓ |                           | 3 ↑, 4 ↓                  |                          | 3 ↑, 8 ↓                  |
| Os04t0688300-01                       | 4.580                     | 2.039    | Os03t0121200-03           | Inf                       | Os06t0521900-00          | -Inf                      |
| Os09t0538600-01                       | 0.581                     | 1.322    | Os04t0688500-01           | 2.810                     | Os06t0547100-00          | 1.585                     |

|                 |       |        |                 |        |                 |        |
|-----------------|-------|--------|-----------------|--------|-----------------|--------|
| Os10t0109600-02 | -Inf  | -0.668 | Os11t0210100-01 | 1.260  | Os01t0901800-01 | 1.263  |
| Os01t0270300-01 | -Inf  | -1.142 | Os04t0498700-01 | 0.659  | Os06t0695200-00 | 1.059  |
| Os11t0112400-01 | 4.180 | -1.100 | Os07t0156200-00 | 0.543  | Os01t0787000-02 | 0.907  |
| Os01t0327100-02 | 3.810 | -0.293 | Os04t0498700-02 | 0.522  | Os06t0490400-00 | 0.755  |
| Os02t0240100-01 | 3.050 | -0.327 | Os11t0661600-01 | 0.370  | Os02t0161800-01 | 0.652  |
| Os06t0695400-01 | 2.540 | -0.778 | Os07t0677400-00 | 0.242  | Os03t0368300-01 | 0.621  |
| Os06t0695500-01 | 2.360 | 0.088  | Os01t0326100-01 | 0.177  | Os09t0323700-00 | 0.533  |
| Os04t0688600-01 | 1.820 | 0.191  | Os02t0240300-01 | -0.191 | Os04t0651000-01 | 0.450  |
| Os06t0547400-01 | 1.810 | -0.118 | Os04t0602100-01 | -0.315 | Os07t0104500-01 | 0.438  |
| Os05t0134400-01 | 1.780 | -0.280 | Os01t0378100-01 | -0.505 | Os05t0135400-01 | 0.235  |
| Os05t0162000-01 | 1.760 | 0.567  | Os12t0530100-01 | -0.609 | Os06t0546500-01 | 0.215  |
| Os10t0109300-01 | 1.480 | -0.744 | Os04t0683850-00 | -0.642 | Os05t0134700-02 | 0.115  |
| Os07t0677600-01 | 1.450 | 0.972  | Os08t0522400-01 | -1.400 | Os01t0205900-01 | 0.043  |
| Os10t0566800-01 | 1.220 | 0.248  | Os07t0157600-00 | -2.050 | Os04t0688200-01 | 0.000  |
| Os04t0688100-02 | 1.180 | 0.121  | Os02t0553200-02 | -2.520 | Os09t0323900-00 | 0.000  |
| Os07t0694300-01 | 1.000 | 0.225  | Os03t0339300-02 | -4.390 | Os04t0423800-01 | -0.194 |
| Os09t0507500-01 | 0.852 | -0.179 |                 |        | Os07t0499500-01 | -0.237 |
| Os04t0688100-01 | 0.797 | 0.297  |                 |        | Os01t0327000-01 | -0.256 |
| Os01t0963000-01 | 0.789 | -0.692 |                 |        | Os04t0656800-01 | -0.260 |
| Os10t0109600-01 | 0.779 | 0.074  |                 |        | Os05t0134800-00 | -0.272 |
| Os03t0805400-01 | 0.777 | 0.626  |                 |        | Os03t0121300-01 | -0.308 |
| Os03t0121200-01 | 0.740 | -0.124 |                 |        | Os03t0234500-01 | -0.322 |
| Os10t0109300-02 | 0.728 | 0.614  |                 |        | Os03t0369000-01 | -0.335 |
| Os08t0127500-01 | 0.541 | -0.189 |                 |        | Os07t0677300-01 | -0.349 |
| Os03t0285700-01 | 0.494 | -0.085 |                 |        | Os01t0294500-00 | -0.349 |
| Os01t0270300-02 | 0.419 | -0.060 |                 |        | Os11t0112200-01 | -0.354 |
| Os01t0172600-01 | 0.394 | 0.301  |                 |        | Os05t0135000-01 | -0.423 |
| Os04t0465100-01 | 0.386 | 0.050  |                 |        | Os03t0563600-01 | -0.508 |
| Os02t0664000-01 | 0.300 | 0.060  |                 |        | Os05t0135200-01 | -0.515 |
| Os02t0833900-03 | 0.298 | -0.054 |                 |        | Os07t0638600-00 | -0.519 |
| Os06t0185900-01 | 0.282 | -0.285 |                 |        | Os10t0536600-00 | -0.600 |
| Os04t0556300-01 | 0.261 | 0.151  |                 |        | Os04t0689000-01 | -0.642 |
| Os08t0532700-01 | 0.244 | -0.354 |                 |        | Os01t0263000-00 | -0.692 |
| Os02t0236800-02 | 0.237 | 0.239  |                 |        | Os06t0695300-01 | -0.737 |
| Os03t0288700-01 | 0.225 | 0.100  |                 |        | Os07t0639000-01 | -0.749 |
| Os01t0326300-01 | 0.220 | 0.229  |                 |        | Os07t0156467-00 | -0.773 |
| Os12t0178100-01 | 0.187 | -0.027 |                 |        | Os07t0157000-00 | -0.807 |
| Os01t0327400-01 | 0.145 | -0.716 |                 |        | Os05t0134700-01 | -0.856 |
| Os07t0104100-01 | 0.140 | -0.697 |                 |        | Os03t0368000-00 | -0.866 |
| Os06t0521500-02 | 0.129 | -0.216 |                 |        | Os07t0639400-01 | -0.880 |
| Os03t0358100-01 | 0.118 | 0.199  |                 |        | Os03t0369600-00 | -0.931 |
| Os02t0704500-01 | 0.112 | 0.194  |                 |        | Os03t0339400-01 | -1.280 |
| Os07t0677100-01 | 0.107 | 0.096  |                 |        | Os07t0531400-01 | -1.322 |
| Os01t0327100-01 | 0.105 | -0.677 |                 |        | Os08t0302000-01 | -1.449 |
| Os07t0626700-01 | 0.080 | -1.858 |                 |        | Os01t0205900-02 | -2.385 |

|                 |        |        |  |  |                 |        |
|-----------------|--------|--------|--|--|-----------------|--------|
| Os05t0499400-01 | 0.066  | -0.495 |  |  | Os06t0681600-02 | -2.459 |
| Os01t0263300-01 | 0.058  | -0.177 |  |  | Os01t0326000-02 | -5.615 |
| Os06t0521500-01 | 0.048  | 0.101  |  |  | Os04t0556300-02 | -6.340 |
| Os05t0134400-02 | 0.005  | -0.218 |  |  |                 |        |
| Os05t0548800-01 | -0.005 | 0.072  |  |  |                 |        |
| Os06t0625500-01 | -0.034 | -0.619 |  |  |                 |        |
| Os01t0901800-02 | -0.061 | 0.473  |  |  |                 |        |
| Os01t0543100-01 | -0.063 | -0.475 |  |  |                 |        |
| Os06t0306300-01 | -0.098 | -0.654 |  |  |                 |        |
| Os04t0223300-00 | -0.099 | -0.142 |  |  |                 |        |
| Os02t0236800-01 | -0.101 | -0.311 |  |  |                 |        |
| Os06t0625500-03 | -0.112 | -0.215 |  |  |                 |        |
| Os05t0499400-02 | -0.119 | -1.485 |  |  |                 |        |
| Os08t0549100-01 | -0.123 | 0.314  |  |  |                 |        |
| Os07t0677200-01 | -0.137 | -0.573 |  |  |                 |        |
| Os07t0115300-01 | -0.144 | 0.180  |  |  |                 |        |
| Os02t0553200-01 | -0.196 | -0.263 |  |  |                 |        |
| Os06t0681600-01 | -0.208 | -0.587 |  |  |                 |        |
| Os07t0694700-01 | -0.258 | -0.155 |  |  |                 |        |
| Os03t0762400-01 | -0.264 | -0.142 |  |  |                 |        |
| Os04t0486900-01 | -0.272 | 0.044  |  |  |                 |        |
| Os06t0274800-01 | -0.282 | -0.993 |  |  |                 |        |
| Os01t0962700-01 | -0.286 | -0.097 |  |  |                 |        |
| Os02t0236600-01 | -0.306 | 0.101  |  |  |                 |        |
| Os03t0121200-02 | -0.408 | -1.115 |  |  |                 |        |
| Os12t0112000-01 | -0.453 | -1.787 |  |  |                 |        |
| Os08t0532600-01 | -0.505 | 0.459  |  |  |                 |        |
| Os07t0677200-02 | -0.505 | -1.286 |  |  |                 |        |
| Os01t0294700-01 | -0.508 | -0.450 |  |  |                 |        |
| Os02t0192700-02 | -0.549 | -2.322 |  |  |                 |        |
| Os03t0368900-01 | -0.560 | -0.100 |  |  |                 |        |
| Os11t0284900-01 | -0.584 | -0.055 |  |  |                 |        |
| Os05t0135500-01 | -0.659 | -0.663 |  |  |                 |        |
| Os09t0471100-01 | -0.685 | 0.771  |  |  |                 |        |
| Os02t0661800-01 | -0.694 | 0.524  |  |  |                 |        |
| Os02t0833900-02 | -0.886 | -0.064 |  |  |                 |        |
| Os05t0499300-01 | -0.952 | -0.417 |  |  |                 |        |
| Os03t0235000-01 | -0.984 | -0.896 |  |  |                 |        |
| Os01t0787000-01 | -1.010 | -0.527 |  |  |                 |        |
| Os09t0308900-01 | -1.050 | 0.507  |  |  |                 |        |
| Os07t0676900-01 | -1.060 | -0.409 |  |  |                 |        |
| Os12t0178200-01 | -1.080 | 0.000  |  |  |                 |        |
| Os03t0234900-01 | -1.340 | -0.040 |  |  |                 |        |
| Os12t0191500-01 | -1.350 | -1.078 |  |  |                 |        |
| Os01t0326000-01 | -1.400 | -0.248 |  |  |                 |        |

|                                    |                           |          |                           |                           |                          |                           |
|------------------------------------|---------------------------|----------|---------------------------|---------------------------|--------------------------|---------------------------|
| Os08t0113000-01                    | -1.500                    | -0.642   |                           |                           |                          |                           |
| Os06t0522300-01                    | -1.540                    | -0.597   |                           |                           |                          |                           |
| Os03t0762300-01                    | -1.620                    | -0.206   |                           |                           |                          |                           |
| Os04t0434800-02                    | -1.630                    | -0.361   |                           |                           |                          |                           |
| Os03t0805400-02                    | -1.950                    | 0.000    |                           |                           |                          |                           |
| Os04t0434800-01                    | -2.030                    | 0.555    |                           |                           |                          |                           |
| Os10t0536700-01                    | -2.440                    | -0.467   |                           |                           |                          |                           |
| Os01t0963000-04                    | -5.490                    | -0.363   |                           |                           |                          |                           |
| Os03t0762300-02                    | -6.230                    | 0.140    |                           |                           |                          |                           |
| <b>Ascorbate peroxidase</b>        | 3 ↓                       | 1 ↑      |                           | 2 ↑, 0 ↓                  |                          |                           |
| Os09t0538600-01                    | 0.581                     | 1.322    | Os04t0602100-01           | -0.315                    |                          |                           |
| Os03t0285700-01                    | 0.494                     | -0.085   | Os08t0522400-01           | -1.400                    |                          |                           |
| Os04t0223300-00                    | -0.099                    | -0.142   | Os02t0553200-02           | -2.520                    |                          |                           |
| Os08t0549100-01                    | -0.123                    | 0.314    |                           |                           |                          |                           |
| Os02t0553200-01                    | -0.196                    | -0.263   |                           |                           |                          |                           |
| Os07t0694700-01                    | -0.258                    | -0.155   |                           |                           |                          |                           |
| Os12t0178200-01                    | -1.080                    | 0.000    |                           |                           |                          |                           |
| Os04t0434800-02                    | -1.630                    | -0.361   |                           |                           |                          |                           |
| Os04t0434800-01                    | -2.030                    | 0.555    |                           |                           |                          |                           |
| <b>Catalase</b>                    | 0 ↑, 3 ↓                  | 1 ↑, 2 ↓ |                           | 0 ↑, 0 ↓                  |                          |                           |
| Os06t0727200-02                    | 0.352                     | 0.558    | Os03t0131200-01           | -0.098                    |                          |                           |
| Os06t0727200-01                    | 0.316                     | 0.448    |                           |                           |                          |                           |
| Os03t0131200-02                    | -0.009                    | 1.807    |                           |                           |                          |                           |
| Os02t0115700-03                    | -1.460                    | -Inf     |                           |                           |                          |                           |
| Os02t0115700-01                    | -1.570                    | -0.650   |                           |                           |                          |                           |
| Os02t0115700-02                    | -7.300                    | -Inf     |                           |                           |                          |                           |
| <b>Gene both in shoot and root</b> |                           |          | <b>Gene only in shoot</b> |                           | <b>Gene only in root</b> |                           |
| Gene ID                            | Log <sub>2</sub> (IPU/CK) |          | Gene ID                   | Log <sub>2</sub> (IPU/CK) | Gene ID                  | Log <sub>2</sub> (IPU/CK) |
|                                    | Shoot                     | Root     |                           |                           |                          |                           |
| <b>Transporter</b>                 |                           |          |                           |                           |                          |                           |
| <b>MATE</b>                        | 0 ↑, 0 ↓                  | 3 ↑, 3 ↓ |                           | 0 ↑, 1 ↓                  |                          | 0 ↑, 1 ↓                  |
| Os03t0858800-01                    | 0.687                     | -0.116   | Os09t0524300-00           | 0.604                     | Os10t0344900-01          | 0.737                     |
| Os10t0345100-01                    | 0.641                     | 1.060    | Os11t0126100-01           | -0.913                    | Os09t0468000-01          | -0.303                    |
| Os07t0516600-01                    | 0.474                     | -0.789   | Os11t0129200-00           | -2.460                    | Os06t0495500-01          | -1.348                    |
| Os08t0480000-01                    | 0.399                     | -0.472   |                           |                           |                          |                           |
| Os03t0216700-01                    | 0.345                     | -1.080   |                           |                           |                          |                           |
| Os03t0839200-01                    | 0.333                     | -0.065   |                           |                           |                          |                           |
| Os07t0502200-01                    | 0.327                     | 0.215    |                           |                           |                          |                           |
| Os02t0273800-02                    | 0.263                     | 0.137    |                           |                           |                          |                           |
| Os02t0273800-01                    | 0.263                     | -0.316   |                           |                           |                          |                           |
| Os03t0572900-01                    | 0.209                     | 0.488    |                           |                           |                          |                           |
| Os01t0504500-02                    | 0.169                     | -0.682   |                           |                           |                          |                           |
| Os03t0626700-01                    | 0.145                     | -0.429   |                           |                           |                          |                           |
| Os06t0707100-01                    | 0.078                     | -0.325   |                           |                           |                          |                           |



|                                   |          |          |                 |          |                 |          |
|-----------------------------------|----------|----------|-----------------|----------|-----------------|----------|
| Os10t0206800-01                   | 0.037    | 0.593    |                 |          |                 |          |
| Os01t0684900-01                   | 0.033    | 0.194    |                 |          |                 |          |
| Os03t0570800-01                   | -0.058   | -1.860   |                 |          |                 |          |
| Os04t0571600-01                   | -0.360   | 0.537    |                 |          |                 |          |
| Os08t0550200-01                   | -0.369   | -1.820   |                 |          |                 |          |
| Os10t0190900-01                   | -0.374   | -0.527   |                 |          |                 |          |
| Os06t0494400-01                   | -0.401   | 0.329    |                 |          |                 |          |
| Os10t0195000-01                   | -0.657   | 2.110    |                 |          |                 |          |
| Os02t0676400-00                   | -0.800   | 3.540    |                 |          |                 |          |
| Os12t0126000-01                   | -0.807   | -0.913   |                 |          |                 |          |
| <b>Monosaccharide transporter</b> | 2 ↑, 0 ↓ | 1 ↑, 1 ↓ |                 |          |                 | 1 ↑, 1 ↓ |
| Os07t0559700-00                   | 2.460    | 0.806    |                 |          | Os06t0141100-00 | 3.700    |
| Os07t0106200-03                   | 1.270    | -0.208   |                 |          | Os02t0574000-01 | -0.986   |
| Os02t0573500-01                   | 0.536    | 0.464    |                 |          |                 |          |
| Os09t0268300-02                   | 0.266    | 1.222    |                 |          |                 |          |
| Os04t0452700-01                   | -0.052   | 0.902    |                 |          |                 |          |
| Os03t0594400-01                   | -0.065   | -0.056   |                 |          |                 |          |
| Os04t0453200-01                   | -0.087   | 0.427    |                 |          |                 |          |
| Os04t0454200-01                   | -0.117   | -1.182   |                 |          |                 |          |
| Os07t0131600-01                   | -0.320   | -0.075   |                 |          |                 |          |
| Os04t0453400-02                   | -1.400   | -0.809   |                 |          |                 |          |
| <b>ABC transporter</b>            | 4 ↑, 6 ↓ | 8 ↑, 7 ↓ |                 | 4 ↑, 5 ↓ |                 | 2 ↑, 0 ↓ |
| Os03t0441500-02                   | Inf      | -Inf     | Os01t0218700-02 | Inf      | Os05t0137200-03 | Inf      |
| Os11t0587600-01                   | -Inf     | 0.251    | Os01t0786000-01 | Inf      | Os06t0126100-01 | 1.807    |
| Os01t0770500-02                   | 4.370    | 3.322    | Os05t0222200-02 | 3.770    | Os04t0528400-01 | 0.585    |
| Os09t0472100-01                   | 1.600    | 0.259    | Os01t0902100-00 | 1.140    | Os06t0589300-01 | 0.171    |
| Os05t0384600-01                   | 1.180    | 0.000    | Os04t0209200-01 | 0.998    | Os04t0588700-01 | 0.095    |
| Os03t0281900-01                   | 0.955    | -1.049   | Os10t0494300-01 | 0.855    | Os01t0393400-00 | 0.000    |
| Os03t0142800-01                   | 0.807    | 0.556    | Os03t0157400-02 | 0.785    | Os08t0398300-01 | -0.219   |
| Os08t0564300-01                   | 0.757    | 2.678    | Os01t0977901-00 | 0.633    | Os12t0239900-01 | -0.263   |
| Os06t0128300-01                   | 0.738    | -0.597   | Os11t0416900-01 | 0.377    | Os01t0533900-02 | -0.344   |
| Os02t0528900-01                   | 0.732    | 0.619    | Os02t0318500-00 | 0.225    | Os01t0696600-01 | -0.848   |
| Os08t0564100-01                   | 0.636    | 0.016    | Os01t0695800-01 | 0.177    | Os01t0615500-00 | -0.954   |
| Os04t0194500-01                   | 0.554    | 0.848    | Os01t0724500-01 | 0.048    |                 |          |
| Os06t0554800-01                   | 0.494    | 0.474    | Os07t0464600-01 | -0.033   |                 |          |
| Os01t0356400-01                   | 0.478    | 0.318    | Os04t0528300-01 | -0.296   |                 |          |
| Os12t0267800-01                   | 0.474    | 0.458    | Os07t0191600-02 | -0.308   |                 |          |
| Os03t0859500-01                   | 0.469    | 0.630    | Os09t0125900-01 | -0.402   |                 |          |
| Os01t0173900-01                   | 0.337    | 0.363    | Os07t0288700-02 | -0.641   |                 |          |
| Os03t0280000-01                   | 0.310    | 0.724    | Os05t0222200-01 | -0.661   |                 |          |
| Os08t0384500-01                   | 0.259    | 0.567    | Os01t0534700-00 | -0.952   |                 |          |
| Os01t0121700-01                   | 0.238    | 0.436    | Os03t0157400-01 | -0.974   |                 |          |
| Os02t0575500-01                   | 0.174    | 0.441    | Os02t0318600-00 | -1.100   |                 |          |
| Os01t0609900-02                   | 0.129    | -0.246   | Os06t0731200-01 | -1.130   |                 |          |

|                                   |           |           |                 |           |                 |           |
|-----------------------------------|-----------|-----------|-----------------|-----------|-----------------|-----------|
| Os09t0392400-02                   | 0.080     | -3.585    | Os12t0411700-01 | -1.470    |                 |           |
| Os07t0522500-01                   | 0.035     | -0.386    | Os04t0528400-02 | -1.700    |                 |           |
| Os01t0218700-01                   | 0.029     | 4.087     | Os01t0695700-00 | -2.220    |                 |           |
| Os08t0167000-01                   | 0.011     | 0.010     |                 |           |                 |           |
| Os01t0966100-01                   | -0.017    | 0.379     |                 |           |                 |           |
| Os02t0826500-01                   | -0.026    | 0.356     |                 |           |                 |           |
| Os08t0398000-01                   | -0.067    | 0.173     |                 |           |                 |           |
| Os03t0332700-01                   | -0.080    | 0.035     |                 |           |                 |           |
| Os04t0620066-00                   | -0.100    | 1.214     |                 |           |                 |           |
| Os05t0107600-01                   | -0.259    | -5.209    |                 |           |                 |           |
| Os11t0490800-01                   | -0.355    | -0.280    |                 |           |                 |           |
| Os03t0441500-01                   | -0.375    | 0.585     |                 |           |                 |           |
| Os09t0332700-01                   | -0.377    | 1.433     |                 |           |                 |           |
| Os10t0442950-00                   | -0.405    | 1.027     |                 |           |                 |           |
| Os03t0181750-00                   | -0.438    | -0.807    |                 |           |                 |           |
| Os01t0770500-01                   | -0.514    | -2.807    |                 |           |                 |           |
| Os02t0318450-00                   | -0.566    | Inf       |                 |           |                 |           |
| Os03t0670100-01                   | -0.860    | 0.170     |                 |           |                 |           |
| Os05t0137100-01                   | -1.110    | -0.363    |                 |           |                 |           |
| Os01t0976100-01                   | -1.140    | 0.737     |                 |           |                 |           |
| Os08t0564300-05                   | -1.400    | -Inf      |                 |           |                 |           |
| Os01t0836600-01                   | -1.630    | -1.666    |                 |           |                 |           |
| Os06t0128300-03                   | -6.770    | 5.209     |                 |           |                 |           |
| <b>(Oligo)peptide transporter</b> | 5 ↑ , 5 ↓ | 6 ↑ , 4 ↓ |                 | 1 ↑ , 1 ↓ |                 | 1 ↑ , 2 ↓ |
| Os03t0719900-01                   | 4.690     | 4.459     | Os07t0603800-02 | 2.050     | Os08t0486933-00 | 1.138     |
| Os01t0142800-03                   | 3.340     | Inf       | Os02t0116400-01 | -0.075    | Os05t0411100-00 | -0.129    |
| Os04t0524500-01                   | 1.640     | 1.426     | Os12t0638200-01 | -0.128    | Os01t0902700-01 | -0.286    |
| Os02t0695900-01                   | 1.390     | 0.271     | Os07t0100600-01 | -1.530    | Os01t0960900-00 | -1.524    |
| Os02t0695800-01                   | 1.320     | 0.332     |                 |           | Os06t0706100-00 | -1.759    |
| Os06t0125500-02                   | 0.950     | 2.907     |                 |           |                 |           |
| Os04t0491200-00                   | 0.785     | 0.411     |                 |           |                 |           |
| Os04t0524600-01                   | 0.381     | 0.254     |                 |           |                 |           |
| Os10t0470700-01                   | 0.331     | 0.580     |                 |           |                 |           |
| Os01t0142800-01                   | 0.307     | 0.052     |                 |           |                 |           |
| Os11t0235200-01                   | 0.209     | 0.256     |                 |           |                 |           |
| Os03t0719900-02                   | 0.154     | 0.988     |                 |           |                 |           |
| Os06t0125500-01                   | 0.080     | -2.170    |                 |           |                 |           |
| Os03t0235300-01                   | 0.048     | 1.503     |                 |           |                 |           |
| Os08t0527733-00                   | -0.045    | 0.000     |                 |           |                 |           |
| Os10t0469900-02                   | -0.047    | Inf       |                 |           |                 |           |
| Os03t0719900-04                   | -0.065    | 0.142     |                 |           |                 |           |
| Os04t0390600-01                   | -0.150    | 0.346     |                 |           |                 |           |
| Os06t0706400-01                   | -0.253    | 0.637     |                 |           |                 |           |
| Os12t0638300-01                   | -0.340    | -1.293    |                 |           |                 |           |

|                               |           |        |                 |           |                 |           |
|-------------------------------|-----------|--------|-----------------|-----------|-----------------|-----------|
| Os05t0338900-00               | -0.474    | -0.496 |                 |           |                 |           |
| Os02t0580900-02               | -0.581    | 0.720  |                 |           |                 |           |
| Os05t0431700-01               | -0.600    | -0.731 |                 |           |                 |           |
| Os06t0125400-00               | -0.864    | -0.562 |                 |           |                 |           |
| Os03t0235700-01               | -0.889    | -0.312 |                 |           |                 |           |
| Os01t0872500-02               | -0.934    | 0.646  |                 |           |                 |           |
| Os01t0871600-01               | -1.060    | -0.421 |                 |           |                 |           |
| Os05t0410900-02               | -1.240    | -0.397 |                 |           |                 |           |
| Os06t0705600-00               | -2.050    | -4.858 |                 |           |                 |           |
| Os06t0127700-01               | -2.150    | -1.222 |                 |           |                 |           |
| Os01t0872500-01               | -3.330    | -0.633 |                 |           |                 |           |
| <b>Amino acid transporter</b> | 2 ↑ , 1 ↓ |        |                 | 0 ↑ , 2 ↓ |                 | 1 ↑ , 7 ↓ |
| Os01t0825800-02               | 2.830     | 0.612  | Os01t0945300-02 | -Inf      | Os01t0878700-03 | -Inf      |
| Os02t0655700-01               | 1.140     | 0.149  | Os04t0542800-01 | -0.210    | Os12t0485600-01 | 1.585     |
| Os04t0435100-01               | 0.291     | 0.225  | Os01t0945300-01 | -4.300    | Os01t0856500-02 | 0.907     |
| Os03t0576900-01               | -0.402    | -0.500 |                 |           | Os02t0788800-01 | 0.846     |
| Os06t0539400-01               | -0.623    | -0.987 |                 |           | Os12t0623500-01 | 0.718     |
| Os10t0437100-01               | -0.677    | -0.755 |                 |           | Os03t0817200-01 | 0.714     |
| Os02t0700500-01               | -1.050    | -0.541 |                 |           | Os02t0101000-01 | 0.645     |
|                               |           |        |                 |           | Os06t0275800-01 | 0.610     |
|                               |           |        |                 |           | Os04t0460300-01 | 0.599     |
|                               |           |        |                 |           | Os10t0415100-01 | 0.591     |
|                               |           |        |                 |           | Os01t0945200-00 | 0.531     |
|                               |           |        |                 |           | Os07t0231400-01 | 0.522     |
|                               |           |        |                 |           | Os08t0127100-02 | 0.508     |
|                               |           |        |                 |           | Os01t0856500-01 | 0.492     |
|                               |           |        |                 |           | Os06t0633800-01 | 0.483     |
|                               |           |        |                 |           | Os08t0127100-01 | 0.423     |
|                               |           |        |                 |           | Os03t0641200-00 | 0.382     |
|                               |           |        |                 |           | Os01t0945100-00 | 0.344     |
|                               |           |        |                 |           | Os01t0825800-01 | 0.276     |
|                               |           |        |                 |           | Os02t0191300-01 | 0.228     |
|                               |           |        |                 |           | Os04t0470700-01 | 0.219     |
|                               |           |        |                 |           | Os01t0878700-02 | 0.197     |
|                               |           |        |                 |           | Os12t0623500-02 | 0.118     |
|                               |           |        |                 |           | Os05t0586500-01 | 0.089     |
|                               |           |        |                 |           | Os06t0644700-01 | 0.079     |
|                               |           |        |                 |           | Os06t0633800-02 | 0.054     |
|                               |           |        |                 |           | Os10t0415100-02 | -0.062    |
|                               |           |        |                 |           | Os01t0209800-02 | -0.067    |
|                               |           |        |                 |           | Os12t0181600-01 | -0.132    |
|                               |           |        |                 |           | Os06t0275800-02 | -0.206    |
|                               |           |        |                 |           | Os01t0597600-01 | -0.300    |
|                               |           |        |                 |           | Os01t0209800-01 | -0.322    |

|                          |           |           |                 |           |                 |           |
|--------------------------|-----------|-----------|-----------------|-----------|-----------------|-----------|
|                          |           |           |                 |           | Os01t0857400-01 | -0.382    |
|                          |           |           |                 |           | Os11t0169200-00 | -0.437    |
|                          |           |           |                 |           | Os02t0788800-02 | -0.487    |
|                          |           |           |                 |           | Os06t0228500-01 | -0.600    |
|                          |           |           |                 |           | Os03t0654400-01 | -0.678    |
|                          |           |           |                 |           | Os04t0543600-01 | -0.766    |
|                          |           |           |                 |           | Os01t0908600-01 | -0.807    |
|                          |           |           |                 |           | Os03t0654400-02 | -1.000    |
|                          |           |           |                 |           | Os01t0878400-01 | -1.047    |
|                          |           |           |                 |           | Os06t0275800-03 | -1.170    |
|                          |           |           |                 |           | Os01t0617650-00 | -1.222    |
|                          |           |           |                 |           | Os04t0562100-01 | -1.467    |
|                          |           |           |                 |           | Os03t0375900-01 | -1.763    |
| <b>Sugar transporter</b> | 9 ↑ , 7 ↓ | 4 ↑ , 3 ↓ |                 | 2 ↑ , 0 ↓ |                 | 1 ↑ , 0 ↓ |
| Os10t0539900-04          | -Inf      | -0.491    | Os11t0620400-01 | Inf       | Os06t0141100-00 | 3.700     |
| Os10t0360100-01          | 6.410     | 1.212     | Os04t0511400-01 | 4.120     | Os07t0206600-01 | 0.349     |
| Os07t0561800-01          | 3.850     | 0.000     | Os07t0561800-02 | 0.633     | Os11t0643800-01 | -0.358    |
| Os07t0559700-00          | 2.460     | 0.806     | Os09t0268300-02 | 0.266     | Os11t0594000-01 | -0.907    |
| Os07t0106200-02          | 2.260     | 0.410     | Os03t0363600-01 | 0.107     | Os02t0574000-01 | -0.986    |
| Os12t0512100-01          | 1.640     | 0.902     | Os03t0101300-02 | -1.140    |                 |           |
| Os05t0169700-00          | 1.590     | 0.000     |                 |           |                 |           |
| Os02t0672400-02          | 1.400     | 0.415     |                 |           |                 |           |
| Os07t0106200-03          | 1.270     | -0.208    |                 |           |                 |           |
| Os03t0218400-01          | 1.010     | -0.707    |                 |           |                 |           |
| Os02t0832100-00          | 0.829     | -0.072    |                 |           |                 |           |
| Os04t0491700-01          | 0.817     | 0.906     |                 |           |                 |           |
| Os07t0151200-00          | 0.655     | 0.271     |                 |           |                 |           |
| Os02t0573500-01          | 0.536     | 0.464     |                 |           |                 |           |
| Os01t0133400-01          | 0.528     | 0.547     |                 |           |                 |           |
| Os08t0410500-01          | 0.467     | 0.777     |                 |           |                 |           |
| Os09t0268300-02          | 0.266     | 1.222     |                 |           |                 |           |
| Os07t0131250-00          | 0.094     | -1.000    |                 |           |                 |           |
| Os03t0363500-02          | -0.003    | 0.585     |                 |           |                 |           |
| Os04t0452700-01          | -0.052    | 0.902     |                 |           |                 |           |
| Os03t0594400-01          | -0.065    | -0.056    |                 |           |                 |           |
| Os04t0453200-01          | -0.087    | 0.427     |                 |           |                 |           |
| Os04t0454200-01          | -0.117    | -1.182    |                 |           |                 |           |
| Os10t0579200-01          | -0.121    | 0.245     |                 |           |                 |           |
| Os02t0604300-01          | -0.225    | 0.159     |                 |           |                 |           |
| Os04t0490600-01          | -0.225    | 0.000     |                 |           |                 |           |
| Os06t0523400-01          | -0.246    | -0.898    |                 |           |                 |           |
| Os11t0620400-02          | -0.265    | 0.405     |                 |           |                 |           |
| Os01t0898900-01          | -0.300    | -0.152    |                 |           |                 |           |
| Os07t0131600-01          | -0.320    | -0.075    |                 |           |                 |           |
| Os03t0101300-01          | -0.341    | -0.152    |                 |           |                 |           |

|                                    |                           |           |                           |                           |                          |                           |
|------------------------------------|---------------------------|-----------|---------------------------|---------------------------|--------------------------|---------------------------|
| Os04t0529800-01                    | -0.352                    | -0.206    |                           |                           |                          |                           |
| Os07t0573700-01                    | -0.367                    | -0.093    |                           |                           |                          |                           |
| Os02t0573300-01                    | -0.738                    | 0.030     |                           |                           |                          |                           |
| Os02t0672400-01                    | -0.893                    | 1.054     |                           |                           |                          |                           |
| Os03t0197100-01                    | -1.180                    | -0.585    |                           |                           |                          |                           |
| Os04t0453400-02                    | -1.400                    | -0.809    |                           |                           |                          |                           |
| Os02t0110400-01                    | -1.420                    | 0.027     |                           |                           |                          |                           |
| Os10t0539900-02                    | -1.440                    | 0.082     |                           |                           |                          |                           |
| Os02t0574100-01                    | -2.760                    | 1.132     |                           |                           |                          |                           |
| Os02t0229400-02                    | -3.900                    | -1.939    |                           |                           |                          |                           |
| <b>MRP</b>                         | 0 ↑ , 1 ↓                 | 1 ↑ , 0 ↓ |                           | 0 ↑ , 0 ↓                 |                          |                           |
| Os01t0533900-01                    | -Inf                      | 0.152     | Os05t0196100-01           | -0.751                    |                          |                           |
| Os05t0196100-02                    | 0.909                     | 0.405     |                           |                           |                          |                           |
| Os06t0158900-00                    | -0.453                    | 1.000     |                           |                           |                          |                           |
| <b>Gene both in shoot and root</b> |                           |           | <b>Gene only in shoot</b> |                           | <b>Gene only in root</b> |                           |
| Gene ID                            | Log <sub>2</sub> (IPU/CK) |           | Gene ID                   | Log <sub>2</sub> (IPU/CK) | Gene ID                  | Log <sub>2</sub> (IPU/CK) |
|                                    | Shoot                     | Root      |                           |                           |                          |                           |
| <b>Transcription factors</b>       |                           |           |                           |                           |                          |                           |
| <b>NAC family</b>                  | 5 ↑ , 3 ↓                 | 7 ↑ , 2 ↓ |                           | 0 ↑ , 0 ↓                 |                          | 7 ↑ , 3 ↓                 |
| Os11t0126900-01                    | 6.120                     | 0.452     | Os07t0566500-01           | -0.478                    | Os11t0127000-01          | -Inf                      |
| Os07t0683200-01                    | 1.790                     | 1.015     |                           |                           | Os05t0194500-01          | 2.322                     |
| Os03t0815100-01                    | 1.310                     | -0.144    |                           |                           | Os01t0191300-03          | 2.000                     |
| Os08t0200600-01                    | 1.150                     | -0.438    |                           |                           | Os06t0560300-00          | 1.807                     |
| Os01t0816100-01                    | 1.030                     | 0.097     |                           |                           | Os06t0101800-01          | 1.322                     |
| Os03t0327800-01                    | 0.993                     | 0.616     |                           |                           | Os01t0888300-01          | 1.195                     |
| Os05t0194500-01                    | 0.557                     | 2.322     |                           |                           | Os06t0104200-01          | 1.115                     |
| Os03t0133000-01                    | 0.480                     | 0.343     |                           |                           | Os07t0683200-01          | 1.015                     |
| Os06t0104200-01                    | 0.463                     | 1.115     |                           |                           | Os01t0261200-02          | 0.789                     |
| Os02t0822400-02                    | 0.119                     | 0.042     |                           |                           | Os11t0126900-01          | 0.452                     |
| Os01t0888300-01                    | 0.053                     | 1.195     |                           |                           | Os01t0191300-01          | 0.441                     |
| Os11t0184900-02                    | 0.046                     | 0.249     |                           |                           | Os03t0119966-01          | 0.263                     |
| Os07t0225300-01                    | -0.017                    | -1.136    |                           |                           | Os02t0810900-01          | 0.210                     |
| Os01t0261200-02                    | -0.033                    | 0.789     |                           |                           | Os01t0816100-01          | 0.097                     |
| Os06t0101800-01                    | -0.045                    | 1.322     |                           |                           | Os03t0815100-01          | -0.144                    |
| Os01t0191300-01                    | -0.325                    | 0.441     |                           |                           | Os12t0156100-01          | -0.144                    |
| Os02t0810900-01                    | -0.518                    | 0.210     |                           |                           | Os06t0530400-01          | -0.241                    |
| Os06t0560300-00                    | -0.718                    | 1.807     |                           |                           | Os08t0200600-01          | -0.438                    |
| Os01t0191300-03                    | -1.040                    | 2.000     |                           |                           | Os07t0225300-01          | -1.136                    |
| Os12t0156100-01                    | -1.220                    | -0.144    |                           |                           | Os02t0810900-02          | -2.598                    |
| Os03t0777000-01                    | -1.630                    | -1.000    |                           |                           |                          |                           |
| <b>WRKY family</b>                 | 6 ↑ , 6 ↓                 | 3 ↑ , 7 ↓ |                           | 2 ↑ , 3 ↓                 |                          | 2 ↑ , 0 ↓                 |
| Os06t0649000-02                    | -Inf                      | -1.399    | Os07t0416100-01           | 3.370                     | Os02t0265200-02          | Inf                       |
| Os09t0417800-01                    | 2.940                     | 0.049     | Os05t0322900-03           | 2.500                     | Os11t0117500-01          | 2.170                     |
| Os03t0321800-01                    | 2.830                     | -0.202    | Os11t0685700-00           | 0.080                     | Os02t0698800-01          | 0.829                     |
| Os01t0186000-01                    | 2.600                     | -0.100    | Os04t0545000-01           | -0.308                    | Os11t0686250-00          | 0.585                     |

|                 |        |        |                 |        |                 |        |
|-----------------|--------|--------|-----------------|--------|-----------------|--------|
| Os07t0680400-01 | 1.750  | 0.201  | Os01t0842801-00 | -0.367 | Os11t0686400-00 | 0.485  |
| Os12t0597700-01 | 1.380  | 0.506  | Os08t0499300-01 | -0.667 | Os05t0478800-00 | 0.222  |
| Os11t0490900-01 | 1.340  | 0.455  | Os03t0855100-01 | -0.815 | Os01t0289732-01 | 0.211  |
| Os09t0417600-02 | 0.939  | -1.177 | Os12t0102300-01 | -1.010 | Os01t0972800-01 | 0.000  |
| Os03t0321700-01 | 0.794  | -0.403 | Os02t0462800-01 | -1.050 | Os03t0758950-00 | 0.000  |
| Os01t0750100-02 | 0.751  | 0.889  | Os11t0117600-00 | -2.050 | Os02t0770500-00 | -0.033 |
| Os09t0481700-01 | 0.689  | 0.546  |                 |        | Os05t0567200-00 | -0.134 |
| Os05t0343400-01 | 0.686  | 0.243  |                 |        | Os05t0478400-00 | -0.302 |
| Os01t0584900-01 | 0.659  | -0.807 |                 |        | Os03t0798500-00 | -0.341 |
| Os12t0507300-00 | 0.657  | 0.234  |                 |        | Os12t0116700-01 | -0.363 |
| Os08t0235800-00 | 0.647  | -0.225 |                 |        | Os03t0335200-01 | -0.483 |
| Os01t0289600-00 | 0.616  | 0.696  |                 |        | Os06t0158100-00 | -0.531 |
| Os08t0276200-01 | 0.601  | 0.392  |                 |        | Os01t0714800-01 | -0.710 |
| Os12t0102350-01 | 0.582  | 1.032  |                 |        |                 |        |
| Os01t0246700-01 | 0.556  | -0.427 |                 |        |                 |        |
| Os03t0444900-00 | 0.519  | 0.472  |                 |        |                 |        |
| Os01t0734000-01 | 0.501  | -0.218 |                 |        |                 |        |
| Os05t0183100-01 | 0.491  | -0.426 |                 |        |                 |        |
| Os05t0565900-00 | 0.440  | 0.737  |                 |        |                 |        |
| Os01t0626400-01 | 0.437  | -0.559 |                 |        |                 |        |
| Os02t0181300-01 | 0.435  | -0.244 |                 |        |                 |        |
| Os01t0826400-01 | 0.417  | -0.589 |                 |        |                 |        |
| Os06t0649000-01 | 0.370  | -1.186 |                 |        |                 |        |
| Os12t0116400-00 | 0.370  | -1.355 |                 |        |                 |        |
| Os12t0597700-02 | 0.343  | 0.822  |                 |        |                 |        |
| Os03t0758000-01 | 0.338  | 0.508  |                 |        |                 |        |
| Os01t0750100-01 | 0.338  | 0.241  |                 |        |                 |        |
| Os06t0146250-00 | 0.337  | 0.474  |                 |        |                 |        |
| Os01t0665750-01 | 0.267  | 0.615  |                 |        |                 |        |
| Os01t0624700-01 | 0.244  | 0.360  |                 |        |                 |        |
| Os03t0321800-02 | 0.232  | -0.676 |                 |        |                 |        |
| Os07t0583700-01 | 0.203  | 0.292  |                 |        |                 |        |
| Os09t0481700-02 | 0.173  | -0.519 |                 |        |                 |        |
| Os01t0750100-03 | 0.122  | -0.025 |                 |        |                 |        |
| Os05t0537100-00 | 0.106  | -0.636 |                 |        |                 |        |
| Os01t0665500-00 | 0.092  | 0.559  |                 |        |                 |        |
| Os01t0730700-01 | 0.007  | 0.072  |                 |        |                 |        |
| Os01t0201250-00 | 0.004  | -0.336 |                 |        |                 |        |
| Os09t0334500-01 | -0.005 | 0.053  |                 |        |                 |        |
| Os07t0596900-00 | -0.080 | -0.383 |                 |        |                 |        |
| Os04t0287400-01 | -0.182 | 0.221  |                 |        |                 |        |
| Os08t0326900-01 | -0.215 | 0.158  |                 |        |                 |        |
| Os05t0474800-01 | -0.227 | -0.452 |                 |        |                 |        |
| Os11t0116900-01 | -0.276 | 0.184  |                 |        |                 |        |
| Os01t0185900-01 | -0.282 | 0.382  |                 |        |                 |        |

|                   |                  |                  |                 |                  |                 |                   |
|-------------------|------------------|------------------|-----------------|------------------|-----------------|-------------------|
| Os05t0137500-00   | -0.316           | 0.334            |                 |                  |                 |                   |
| Os05t0571200-01   | -0.367           | -0.241           |                 |                  |                 |                   |
| Os02t0265200-01   | -0.373           | 0.412            |                 |                  |                 |                   |
| Os09t0417600-01   | -0.478           | 0.120            |                 |                  |                 |                   |
| Os07t0111400-00   | -0.630           | -1.057           |                 |                  |                 |                   |
| Os05t0322900-01   | -0.636           | -0.315           |                 |                  |                 |                   |
| Os04t0605100-01   | -0.698           | -0.223           |                 |                  |                 |                   |
| Os01t0656400-00   | -0.718           | 1.322            |                 |                  |                 |                   |
| Os05t0322900-02   | -0.746           | -0.374           |                 |                  |                 |                   |
| Os05t0583000-01   | -0.832           | -1.926           |                 |                  |                 |                   |
| Os05t0129800-01   | -1.060           | 1.000            |                 |                  |                 |                   |
| Os01t0182700-01   | -1.120           | -0.263           |                 |                  |                 |                   |
| Os08t0386200-01   | -1.120           | -0.414           |                 |                  |                 |                   |
| Os01t0821600-01   | -1.220           | -0.177           |                 |                  |                 |                   |
| Os04t0471700-00   | -1.570           | -2.170           |                 |                  |                 |                   |
| <b>Myb family</b> | <b>0 ↑ , 5 ↓</b> | <b>0 ↑ , 1 ↓</b> |                 | <b>8 ↑ , 9 ↓</b> |                 | <b>10 ↑ , 4 ↓</b> |
| Os03t0241100-03   | 0.269            | 0.569            | Os01t0812000-01 | Inf              | Os02t0695200-02 | -Inf              |
| Os07t0438800-01   | 0.204            | 0.681            | Os10t0561400-03 | Inf              | Os06t0507300-01 | -Inf              |
| Os01t0589300-01   | 0.112            | 0.462            | Os09t0532900-01 | 3.540            | Os05t0140100-03 | Inf               |
| Os03t0241100-01   | 0.012            | 0.642            | Os01t0128000-01 | 2.860            | Os01t0975300-02 | 3.288             |
| Os05t0442400-01   | -0.078           | 0.485            | Os01t0722300-01 | 2.320            | Os07t0647600-01 | 2.000             |
| Os01t0812000-02   | -0.123           | 0.300            | Os02t0759800-01 | 1.360            | Os04t0593200-01 | 1.766             |
| Os04t0243400-01   | -0.129           | 0.305            | Os11t0700500-01 | 1.220            | Os04t0110300-02 | 1.585             |
| Os03t0329900-01   | -0.137           | 0.220            | Os07t0558100-00 | 1.210            | Os06t0171900-02 | 1.509             |
| Os11t0183700-01   | -0.141           | 0.213            | Os10t0561400-02 | 0.986            | Os08t0157600-01 | 1.356             |
| Os03t0654600-01   | -0.246           | 0.469            | Os04t0110300-02 | 0.984            | Os06t0605600-01 | 1.100             |
| Os03t0771100-01   | -0.268           | 0.194            | Os02t0260700-01 | 0.977            | Os01t0975300-01 | 1.058             |
| Os01t0176700-01   | -0.403           | -0.206           | Os08t0428200-01 | 0.955            | Os01t0841500-01 | 1.000             |
| Os03t0847600-01   | -0.434           | 0.429            | Os11t0684000-01 | 0.923            | Os12t0567300-00 | 0.982             |
| Os09t0532900-04   | -0.436           | 0.307            | Os08t0151000-00 | 0.872            | Os03t0371800-00 | 0.874             |
| Os05t0195700-02   | -0.460           | -0.010           | Os02t0241200-00 | 0.846            | Os02t0776700-02 | 0.856             |
| Os03t0847600-02   | -0.480           | 0.394            | Os02t0104500-01 | 0.745            | Os07t0484700-01 | 0.807             |
| Os02t0618400-02   | -0.488           | -0.415           | Os05t0429900-01 | 0.735            | Os02t0271900-01 | 0.807             |
| Os12t0586300-00   | -0.531           | -0.386           | Os05t0553400-01 | 0.692            | Os12t0207200-01 | 0.807             |
| Os05t0543600-01   | -0.901           | -0.415           | Os01t0975300-01 | 0.682            | Os11t0106100-00 | 0.778             |
| Os01t0274800-01   | -1.370           | 0.181            | Os12t0613300-02 | 0.677            | Os05t0114700-02 | 0.763             |
| Os01t0285300-01   | -1.620           | -0.890           | Os08t0144000-01 | 0.662            | Os12t0175400-01 | 0.742             |
| Os07t0432800-01   | -1.630           | -1.874           | Os07t0688200-01 | 0.659            | Os09t0248900-01 | 0.710             |
| Os04t0594100-01   | -1.780           | -0.170           | Os11t0128500-01 | 0.653            | Os07t0438800-01 | 0.681             |
| Os11t0632200-01   | -1.950           | -0.280           | Os09t0299200-01 | 0.625            | Os03t0142600-00 | 0.678             |
|                   |                  |                  | Os07t0497500-00 | 0.611            | Os03t0241100-03 | 0.569             |
|                   |                  |                  | Os05t0114700-02 | 0.592            | Os01t0589300-01 | 0.462             |
|                   |                  |                  | Os05t0140100-02 | 0.545            | Os05t0195700-01 | 0.368             |
|                   |                  |                  | Os03t0371800-00 | 0.522            | Os04t0243400-01 | 0.305             |
|                   |                  |                  | Os12t0564100-01 | 0.512            | Os01t0812000-02 | 0.300             |

|  |  |  |                 |        |                 |        |
|--|--|--|-----------------|--------|-----------------|--------|
|  |  |  | Os01t0187900-01 | 0.501  | Os06t0112700-00 | 0.276  |
|  |  |  | Os03t0315400-01 | 0.477  | Os03t0329900-01 | 0.220  |
|  |  |  | Os02t0187700-00 | 0.453  | Os11t0183700-01 | 0.213  |
|  |  |  | Os08t0435700-00 | 0.434  | Os04t0463600-01 | 0.196  |
|  |  |  | Os02t0260700-02 | 0.389  | Os03t0771100-01 | 0.194  |
|  |  |  | Os04t0480300-01 | 0.370  | Os01t0274800-01 | 0.181  |
|  |  |  | Os08t0151300-01 | 0.370  | Os06t0221000-00 | 0.181  |
|  |  |  | Os07t0484700-01 | 0.348  | Os02t0641900-01 | 0.152  |
|  |  |  | Os12t0125000-01 | 0.331  | Os03t0252900-00 | 0.120  |
|  |  |  | Os06t0637500-02 | 0.309  | Os05t0459000-01 | 0.000  |
|  |  |  | Os10t0408700-02 | 0.305  | Os05t0195700-02 | -0.010 |
|  |  |  | Os07t0647600-01 | 0.249  | Os02t0700600-01 | -0.064 |
|  |  |  | Os01t0708000-00 | 0.205  | Os09t0106700-01 | -0.138 |
|  |  |  | Os06t0507400-01 | 0.202  | Os09t0431300-00 | -0.149 |
|  |  |  | Os10t0408700-01 | 0.185  | Os04t0594100-01 | -0.170 |
|  |  |  | Os02t0776700-01 | 0.167  | Os01t0176700-01 | -0.206 |
|  |  |  | Os06t0303700-00 | 0.147  | Os11t0632200-01 | -0.280 |
|  |  |  | Os03t0773100-01 | 0.135  | Os08t0548000-01 | -0.290 |
|  |  |  | Os12t0613300-01 | 0.130  | Os12t0586300-00 | -0.386 |
|  |  |  | Os06t0171900-02 | 0.115  | Os02t0618400-02 | -0.415 |
|  |  |  | Os01t0702700-01 | 0.110  | Os05t0543600-01 | -0.415 |
|  |  |  | Os04t0463600-01 | 0.107  | Os09t0538400-01 | -0.473 |
|  |  |  | Os01t0841500-01 | 0.099  | Os01t0285300-01 | -0.890 |
|  |  |  | Os08t0157600-01 | 0.021  | Os07t0432800-01 | -1.874 |
|  |  |  | Os12t0175400-01 | 0.007  | Os08t0486300-00 | -2.269 |
|  |  |  | Os10t0561400-01 | 0.007  |                 |        |
|  |  |  | Os02t0700600-01 | 0.004  |                 |        |
|  |  |  | Os07t0629000-01 | 0.004  |                 |        |
|  |  |  | Os09t0106700-01 | -0.043 |                 |        |
|  |  |  | Os04t0532800-01 | -0.085 |                 |        |
|  |  |  | Os07t0627300-01 | -0.098 |                 |        |
|  |  |  | Os01t0874300-01 | -0.114 |                 |        |
|  |  |  | Os08t0437300-00 | -0.129 |                 |        |
|  |  |  | Os11t0207600-00 | -0.133 |                 |        |
|  |  |  | Os01t0850400-01 | -0.133 |                 |        |
|  |  |  | Os09t0401000-01 | -0.145 |                 |        |
|  |  |  | Os06t0258000-01 | -0.178 |                 |        |
|  |  |  | Os11t0558200-01 | -0.179 |                 |        |
|  |  |  | Os03t0720800-01 | -0.310 |                 |        |
|  |  |  | Os12t0567300-00 | -0.361 |                 |        |
|  |  |  | Os01t0127450-00 | -0.367 |                 |        |
|  |  |  | Os08t0151300-02 | -0.367 |                 |        |
|  |  |  | Os09t0538400-01 | -0.374 |                 |        |
|  |  |  | Os02t0271900-01 | -0.388 |                 |        |
|  |  |  | Os01t0305900-01 | -0.581 |                 |        |



|  |  |  |                 |        |  |  |
|--|--|--|-----------------|--------|--|--|
|  |  |  | Os02t0174000-00 | -0.630 |  |  |
|  |  |  | Os01t0298400-01 | -0.630 |  |  |
|  |  |  | Os11t0180900-00 | -0.712 |  |  |
|  |  |  | Os09t0248900-01 | -0.765 |  |  |
|  |  |  | Os06t0605600-01 | -0.768 |  |  |
|  |  |  | Os05t0206200-01 | -0.978 |  |  |
|  |  |  | Os01t0663051-00 | -1.160 |  |  |
|  |  |  | Os12t0207200-01 | -1.290 |  |  |
|  |  |  | Os02t0696900-00 | -1.410 |  |  |
|  |  |  | Os02t0776700-02 | -1.480 |  |  |
|  |  |  | Os02t0732600-01 | -1.540 |  |  |
|  |  |  | Os05t0195700-01 | -1.670 |  |  |
|  |  |  | Os05t0567600-00 | -2.920 |  |  |
|  |  |  | Os02t0695200-01 | -3.440 |  |  |
|  |  |  | Os05t0140100-03 | -5.740 |  |  |

**ESI Table S11.** The predicted promoters of up-regulated IPU-associated genes under IPU exposure

| Gene ID                            | Predicted Promoters <sup>a</sup> |    |     |    |    |    |     |      |    |    |    |     | Log <sub>2</sub> Ratio <sup>b</sup> |      | Annotation                                        |
|------------------------------------|----------------------------------|----|-----|----|----|----|-----|------|----|----|----|-----|-------------------------------------|------|---------------------------------------------------|
|                                    | I                                | II | III | IV | V  | VI | VII | VIII | IX | X  | XI | XII | Shoot                               | Root |                                                   |
| <b>P450 (26)</b>                   |                                  |    |     |    |    |    |     |      |    |    |    |     |                                     |      |                                                   |
| Os01t0388101-00                    | 0                                | 15 | 0   | 1  | 5  | 0  | 0   | 0    | 0  | 3  | 0  | 0   | 0.00                                | 1.10 | Similar to Phytochrome P450.                      |
| Os01t0602500-01                    | 0                                | 17 | 0   | 1  | 6  | 1  | 0   | 0    | 0  | 8  | 0  | 0   | 1.68                                | 0.00 | Cytochrome P450 domain containing protein.        |
| Os01t0627800-01                    | 2                                | 23 | 0   | 5  | 8  | 0  | 0   | 0    | 0  | 8  | 2  | 2   | 0.00                                | 1.38 | Similar to Cytochrome P450 monooxygenase.         |
| Os01t0628000-01                    | 0                                | 18 | 0   | 9  | 4  | 0  | 0   | 0    | 0  | 6  | 0  | 0   | 0.00                                | 2.19 | Similar to Phytochrome P450-like protein.         |
| Os01t0628700-01                    | 1                                | 36 | 0   | 1  | 7  | 3  | 0   | 1    | 2  | 4  | 0  | 1   | 1.09                                | 0.14 | Cytochrome P450 family protein.                   |
| Os01t0728300-01                    | 4                                | 21 | 0   | 0  | 5  | 0  | 0   | 1    | 0  | 5  | 0  | 1   | 0.06                                | 4.00 | Cytochrome P450 family protein.                   |
| Os01t0804900-01                    | 2                                | 12 | 0   | 10 | 4  | 0  | 0   | 0    | 0  | 1  | 0  | 0   | 1.55                                | 0.00 | Cytochrome P450 family protein.                   |
| Os02t0173100-02                    | 1                                | 20 | 0   | 6  | 3  | 2  | 0   | 0    | 0  | 8  | 0  | 0   | 0.01                                | 1.70 | Cytochrome P450 family protein.                   |
| Os02t0185400-01                    | 0                                | 23 | 0   | 1  | 6  | 3  | 0   | 0    | 2  | 9  | 0  | 0   | 2.60                                | 0.00 | Cytochrome P450 family protein.                   |
| Os02t0186200-00                    | 4                                | 6  | 0   | 2  | 11 | 1  | 0   | 0    | 0  | 1  | 0  | 0   | 2.78                                | 0.00 | Cytochrome P450 domain containing protein.        |
| Os03t0417700-01( <i>GL3.2</i> )    | 2                                | 7  | 1   | 0  | 5  | 2  | 1   | 0    | 0  | 4  | 0  | 0   | 0.00                                | 1.10 | Cytochrome P450 family protein.                   |
| Os03t0594900-01                    | 3                                | 12 | 0   | 10 | 18 | 2  | 0   | 2    | 0  | 1  | 0  | 2   | 0.06                                | 1.12 | Cytochrome P450 family protein.                   |
| Os03t0760200-01 ( <i>CYP81A6</i> ) | 1                                | 15 | 0   | 15 | 10 | 1  | 0   | 0    | 0  | 6  | 1  | 1   | 1.21                                | 0.89 | Cytochrome P450.                                  |
| Os04t0480700-01                    | 3                                | 28 | 0   | 0  | 11 | 0  | 0   | 0    | 0  | 7  | 0  | 0   | 1.41                                | 0.81 | Similar to Cytochrome P450.                       |
| Os05t0181200-01                    | 1                                | 23 | 0   | 1  | 5  | 0  | 0   | 0    | 0  | 10 | 0  | 0   | 0.00                                | 1.83 | Similar to Cytochrome P450.                       |
| Os05t0515200-01                    | 1                                | 16 | 0   | 2  | 11 | 0  | 0   | 0    | 0  | 5  | 0  | 1   | 1.11                                | 0.00 | Cytochrome P450 family protein.                   |
| Os06t0599200-01                    | 1                                | 25 | 0   | 7  | 2  | 0  | 0   | 0    | 2  | 6  | 0  | 0   | 2.28                                | 0.05 | Similar to Cytochrome P450.                       |
| Os07t0418500-01                    | 1                                | 21 | 0   | 10 | 8  | 0  | 0   | 2    | 2  | 9  | 0  | 2   | 0.00                                | 1.39 | Similar to Cytochrome P450 monooxygenase CYP72A5. |
| Os07t0635500-01                    | 2                                | 18 | 1   | 0  | 3  | 0  | 1   | 0    | 2  | 9  | 0  | 0   | 1.23                                | 0.13 | Cytochrome P450 family protein.                   |
| Os08t0152400-00                    | 3                                | 22 | 0   | 13 | 6  | 0  | 0   | 0    | 0  | 5  | 0  | 0   | 0.65                                | 2.02 | Similar to cytochrome P450.                       |
| Os08t0507100-00                    | 4                                | 16 | 0   | 5  | 7  | 2  | 0   | 0    | 0  | 4  | 0  | 0   | 4.23                                | 0.00 | Similar to Cytochrome P450 CYP71K14.              |
| Os08t0507702-01                    | 0                                | 12 | 0   | 2  | 9  | 0  | 0   | 1    | 0  | 6  | 1  | 3   | 1.35                                | 1.22 | Cytochrome P450 family protein.                   |
| Os08t0508000-01                    | 0                                | 10 | 0   | 2  | 7  | 0  | 0   | 0    | 0  | 2  | 0  | 0   | 2.32                                | 0.60 | Cytochrome P450 family protein.                   |
| Os10t0139700-01                    | 3                                | 22 | 0   | 3  | 5  | 0  | 0   | 0    | 0  | 6  | 1  | 1   | 1.02                                | 0.36 | Cytochrome P450 family protein.                   |

|                                     |   |    |   |   |    |   |   |   |   |    |   |   |      |      |                                                                                           |  |
|-------------------------------------|---|----|---|---|----|---|---|---|---|----|---|---|------|------|-------------------------------------------------------------------------------------------|--|
| Os10t0144700-00                     | 1 | 17 | 0 | 1 | 15 | 2 | 0 | 0 | 0 | 5  | 0 | 0 | 1.12 | 0.00 | Cytochrome P450 family protein.                                                           |  |
| Os10t0166600-01                     | 0 | 20 | 0 | 0 | 7  | 1 | 0 | 0 | 0 | 4  | 0 | 0 | 0.03 | 2.32 | Similar to P450.                                                                          |  |
| <b>Monoxygenases (5)</b>            |   |    |   |   |    |   |   |   |   |    |   |   |      |      |                                                                                           |  |
| Os01t0645400-01 ( <i>OsYUCCA1</i> ) | 1 | 11 | 1 | 0 | 4  | 1 | 1 | 0 | 0 | 5  | 0 | 0 | 3.69 | 0.00 | Flavin monooxygenase-like enzyme, Auxin biosynthesis.                                     |  |
| Os03t0182000-00                     | 2 | 21 | 0 | 0 | 7  | 0 | 0 | 0 | 2 | 12 | 0 | 0 | 0.00 | 1.00 | Similar to Flavin-dependent monooxygenase 1.                                              |  |
| Os04t0128900-01 ( <i>OsYUCCA7</i> ) | 4 | 13 | 0 | 0 | 10 | 0 | 0 | 0 | 2 | 4  | 0 | 0 | 1.28 | 0.02 | Flavin monooxygenase-like enzyme, Auxin biosynthesis                                      |  |
| Os06t0203200-01                     | 1 | 25 | 0 | 0 | 7  | 0 | 0 | 0 | 0 | 3  | 0 | 0 | 1.20 | 0.85 | Flavin-containing monooxygenase FMO family protein.                                       |  |
| Os06t0698785-01                     | 1 | 10 | 0 | 0 | 11 | 1 | 0 | 0 | 0 | 4  | 0 | 0 | 0.65 | 1.02 | Similar to Choline monooxygenase.                                                         |  |
| <b>Oxidoreductase (4)</b>           |   |    |   |   |    |   |   |   |   |    |   |   |      |      |                                                                                           |  |
| Os03t0713400-03                     | 2 | 18 | 0 | 2 | 14 | 0 | 0 | 0 | 4 | 6  | 0 | 0 | 2.00 | Inf  | Similar to NADH-ubiquinone oxidoreductase 75 kDa subunit.                                 |  |
| Os03t0774200-02                     | 2 | 18 | 0 | 0 | 8  | 4 | 0 | 0 | 2 | 8  | 0 | 0 | 2.40 | 0.16 | Similar to NADH-ubiquinone oxidoreductase subunit 8.                                      |  |
| Os07t0663800-01                     | 0 | 26 | 0 | 5 | 5  | 1 | 0 | 0 | 0 | 6  | 0 | 0 | 1.30 | 0.47 | Similar to Oxidoreductase.                                                                |  |
| Os07t0675000-03                     | 1 | 12 | 0 | 0 | 11 | 1 | 0 | 0 | 0 | 4  | 0 | 0 | Inf  | 3.86 | Acyl-CoA dehydrogenase/ oxidoreductase.                                                   |  |
| <b>GTs (5)</b>                      |   |    |   |   |    |   |   |   |   |    |   |   |      |      |                                                                                           |  |
| Os02t0203300-00                     | 2 | 18 | 0 | 1 | 6  | 2 | 0 | 0 | 0 | 2  | 0 | 0 | 1.82 | 0.64 | Similar to UDP-glycosyltransferase UGT75E3.                                               |  |
| Os02t0330200-01                     | 1 | 19 | 0 | 5 | 7  | 1 | 0 | 0 | 0 | 4  | 0 | 0 | 1.02 | 0.05 | Glycosyltransferase AER61.                                                                |  |
| Os04t0693000-02                     | 1 | 28 | 0 | 0 | 7  | 1 | 0 | 0 | 0 | 7  | 0 | 0 | 5.23 | Inf  | Similar to dolichyl-diphosphooligosaccharide--protein glycosyltransferase 67 kDa subunit. |  |
| Os07t0657400-01                     | 2 | 26 | 0 | 0 | 10 | 2 | 0 | 0 | 2 | 6  | 0 | 0 | 1.31 | 0.62 | Glycosyltransferase AER61.                                                                |  |
| Os08t0446550-00                     | 2 | 20 | 0 | 8 | 8  | 3 | 0 | 0 | 2 | 4  | 0 | 0 | 0.00 | 2.09 | Glycosyltransferase AER61.                                                                |  |
| <b>GST (1)</b>                      |   |    |   |   |    |   |   |   |   |    |   |   |      |      |                                                                                           |  |
| Os03t0135100-01                     | 2 | 13 | 0 | 0 | 8  | 0 | 0 | 0 | 0 | 1  | 0 | 0 | 1.09 | 0.15 | Glutathione S-transferase GSTF15.                                                         |  |
| <b>MTs (7)</b>                      |   |    |   |   |    |   |   |   |   |    |   |   |      |      |                                                                                           |  |
| Os04t0104900-01                     | 4 | 24 | 0 | 2 | 9  | 1 | 0 | 0 | 0 | 7  | 0 | 0 | 0.00 | 1.02 | Similar to 0-methyltransferase (EC 2.1.1.6).                                              |  |
| Os05t0102000-01                     | 3 | 11 | 0 | 1 | 6  | 2 | 0 | 0 | 0 | 4  | 0 | 0 | 2.03 | 0.00 | SAM dependent carboxyl methyltransferase family protein.                                  |  |
| Os06t0152400-01                     | 1 | 26 | 0 | 1 | 8  | 1 | 0 | 0 | 0 | 10 | 0 | 0 | 1.69 | 1.00 | Hexaprenyldihydroxybenzoate methyltransferase.                                            |  |
| Os06t0646000-02                     | 1 | 16 | 0 | 0 | 10 | 2 | 0 | 0 | 0 | 2  | 0 | 0 | 0.73 | 1.45 | Methyltransferase type 11 domain containing protein.                                      |  |
| Os07t0206700-02                     | 0 | 6  | 0 | 0 | 4  | 1 | 0 | 0 | 0 | 1  | 0 | 0 | 1.45 | 1.82 | Similar to Cycloartenol-C-24-methyltransferase 1.                                         |  |
| Os07t0206700-02                     | 0 | 6  | 0 | 0 | 4  | 1 | 0 | 0 | 0 | 1  | 0 | 0 | 1.45 | 1.82 | Similar to Cycloartenol-C-24-methyltransferase 1.                                         |  |

|                             |   |    |   |   |    |   |   |   |   |    |   |   |      |      |                                                                 |  |
|-----------------------------|---|----|---|---|----|---|---|---|---|----|---|---|------|------|-----------------------------------------------------------------|--|
| Os09t0344500-01             | 6 | 12 | 0 | 0 | 3  | 0 | 0 | 0 | 0 | 2  | 0 | 0 | 1.07 | 0.00 | Similar to <i>O</i> -methyltransferase ZRP4 (EC 2.1.1.-) (OMT). |  |
| <b>ABC transporters (9)</b> |   |    |   |   |    |   |   |   |   |    |   |   |      |      |                                                                 |  |
| Os01t0218700-01             | 2 | 28 | 0 | 0 | 12 | 0 | 0 | 0 | 0 | 7  | 0 | 0 | 0.03 | 4.09 | ABC transporter integral membrane type 1.                       |  |
| Os01t0770500-02             | 0 | 11 | 0 | 1 | 7  | 0 | 0 | 0 | 0 | 2  | 0 | 0 | 4.37 | 3.32 | Similar to ABC transporter ATP-binding protein.                 |  |
| Os01t0770500-02             | 0 | 11 | 0 | 1 | 7  | 0 | 0 | 0 | 0 | 2  | 0 | 0 | 4.37 | 3.32 | Similar to ABC transporter ATP-binding protein.                 |  |
| Os01t0902100-00             | 4 | 14 | 0 | 2 | 9  | 2 | 0 | 0 | 2 | 3  | 0 | 0 | 1.14 | 0.00 | Similar to MRP-like ABC transporter.                            |  |
| Os05t0222200-02             | 3 | 15 | 0 | 4 | 12 | 2 | 0 | 0 | 0 | 7  | 0 | 0 | 3.77 | 0.00 | ABC transporter-like domain containing protein.                 |  |
| Os05t0384600-01             | 0 | 28 | 0 | 0 | 11 | 2 | 0 | 0 | 0 | 8  | 0 | 0 | 1.18 | 0.00 | ABC transporter-like domain containing protein.                 |  |
| Os06t0126100-01             | 3 | 19 | 0 | 1 | 7  | 0 | 0 | 0 | 0 | 7  | 0 | 0 | 0.00 | 1.81 | ABC transporter, conserved site domain containing protein.      |  |
| Os08t0564300-01             | 2 | 23 | 0 | 1 | 7  | 2 | 0 | 1 | 0 | 11 | 0 | 1 | 0.76 | 2.68 | ABC transporter-like domain containing protein.                 |  |
| Os09t0472100-01             | 2 | 22 | 0 | 3 | 8  | 0 | 0 | 0 | 2 | 9  | 0 | 0 | 1.60 | 0.26 | Similar to ABC transporter.                                     |  |

<sup>a</sup> 12 promoters were predicted as follows:

- I. *TATCCAOSAMY*, TATCCA element found in alpha-amylase promoters of rice (*O.s.*) at positions ca.90 to 150bp upstream of the transcription start sites, and are binding sites of *OsMYBS1*, *OsMYBS2* and *OsMYBS3* which mediate sugar and hormone regulation of alpha-amylase gene expression;
- II. *WRKY71OS* has a core of TGAC-containing W-box of binding site of rice WRKY24/71/72, transcriptional repressors of the gibberellin signaling pathway;
- III. *ABREMOTIFAOSOSEM*, motif A ABRE-like sequence found in rice, is essential for activation by VP1 and important for regulation by abscisic acid (ABA);
- IV. *GCCCCORE*, Core of GCC-box found in many pathogen-responsive genes, has been shown to function as ethylene-responsive element and appears to play important roles in regulating jasmonate-responsive and defense-related gene expression;
- V. *MYBCORE* has a binding site for all animal MYB and some plant MYB proteins that are responsive to abiotic stress;
- VI. *MYBPLANT* has a plant MYB binding site, which consensus sequence related to box P in promoters of phenylpropanoid biosynthetic genes such as PAL;
- VII. *ACGTABREMOTIFAOSOSEM*, ABRE motif A found in the promoter of the rice, is required for ABA-responsiveness and VP1;
- VIII. *EMBPITAEM* has an ng site of trans-acting factor EMBP-1 and a binding site of ABFs whose expression is induced by ABA and various stress treatment;
- IX. *RYREPEATVFLEB4* is RY repeat motif which is found in rice;
- X. *WBOXATNPRI*, W-box found in promoter of *Arabidopsis thaliana* NPR1 gene recognized specifically by salicylic acid (SA)-induced WRKY DNA binding proteins;
- XI. *ABREA2HVAI* is an ABA responsive element which has stress response in barely;
- XII. ABREATCONSENSUS AB is A-responsive elements (ABREs) found in the promoter of ABA and/or stress-regulated genes;

Red boxes indicate the max values in each column;

<sup>b</sup> Ratio, fold-change values.

## EIC Data S1—Materials and methods

### Enzymatic activities assays

**Assay of laccase activity.** Activities of laccase were determined according to the methods of Carine et al. (2009) with some modification.<sup>1</sup> Laccase activity was assayed by adding 5 mL of modified universal buffer (MUB) solution pH 2.0 and 200  $\mu$ L of a 0.01 M ABTS solution to the mixture. The mixture was incubated at 30 °C for 5 min. It was then centrifuged at 11,300 $\times$ g at 4 °C for 2 min and the oxidation rate of ABTS to ABTS<sup>++</sup> released in the supernatant was measured at 420 nm ( $\epsilon = 18,460 \text{ M}^{-1} \text{ cm}^{-1}$ ). Laccase activity was expressed in units defined as  $\mu\text{mol}$  of ABTS<sup>++</sup> formed from ABTS  $\text{min}^{-1}$  (U) and  $\text{g}^{-1}$  of crude protein (U  $\text{g}^{-1}$  protein). Enzyme assays were carried out simultaneously as controls: (1) without ABTS, (2) without crude enzyme extract added to the reaction mixture.

**Assay of POD activity.** POD activity was analyzed based on guaiacol oxidation using hydrogenperoxide. The reaction mixture contained 2.5 mL of 100 mM HAc-NaAc buffer (pH 5.4), 0.1 mL of 1 percent  $\text{H}_2\text{O}_2$ , 0.5 mL of 0.5% ( $w/v$ ) guaiacol and 50 mL enzyme extract. The increase in absorbance at 470 nm was recorded.<sup>2</sup>

**Assay of SOD activity.** SOD activity was determined by measuring its inhibition of the photo chemical reduction of NBT. Three milliliters of reaction mixture contained 50 mM phosphate buffer (pH 7.8), 0.01 mM EDTA, 10 mM methionine, 0.6 mM riboflavin, 1.13 mM NBT and 10–60 mL enzyme extract. The increased absorbance was measured at 560 nm. One

unit of SOD was defined as the amount of enzyme causing half-maximal inhibition of the NBT reduction under the condition described previously.<sup>3</sup>

**Assay of APX activity.** APX activity was measured by the decrease in absorbance at 290 nm. The reaction mixture contained 50 mM Hepes-NaOH (pH 7.6), 0.25 mM ascorbate and 0.1 mM H<sub>2</sub>O<sub>2</sub>.<sup>4</sup> To test whether “unspecific peroxidases” act as APX, samples were incubated for 10 min with 50 μM *p*-chloromercuribenzoate,<sup>5,6</sup> which has been reported to inhibit APX preferentially.<sup>7</sup>

**CPR extraction and activity assay.** Shoot and root tissues (approximately 15 g) were ground to powder in liquid nitrogen and extracted with 1.5 volumes of 100 mM potassium phosphate buffer (pH 7.5) containing 250 mM sucrose, 40 mM ascorbate acid, 5 mM DTT and 1 mM EDTA. The crude homogenized tissues were filtered through several layers of chilled cheesecloth and centrifuged at 12,000×*g* for 15 min. The supernatant was transferred and centrifuged at 100,000×*g* for 90 min (Beckman ultracentrifuge Optima XE-100). Finally, the pellet was resuspended in 100 mM potassium phosphate buffer (pH 7.5), containing 20% (*v/v*) glycerol and 10 mM mercaptoethanol. The microsomal sample was stored at -70 °C prior to use. The protein content of microsomes was measured by the method of Bradford with bovine serum albumin (BSA) as a standard.<sup>8</sup>

NADPH-cytochrome P450 reductase (CPR) activity was conducted by the method of Tan et al. (2015).<sup>9</sup> The 200 μL reaction mixture contained 100 mM potassium phosphate buffer (pH 7.5), 5 mg mL<sup>-1</sup> cytochrome *c* and microsomal suspension (0.5~1 mg mL<sup>-1</sup> protein). 10 μL of

10 mM NADPH was last added to start the reaction. The increase of absorbance at 550 nm was recorded for 5 min at 25 °C using a microplate reader (Molecular Devices SpectraMax M5). The control reaction mixture contained the same components except for potassium phosphate buffer replace the microsomal suspension. The enzyme activity was expressed as  $\text{nmol min}^{-1} \text{mg}^{-1}$  protein using a millimolar extinction coefficient of  $21.1 \text{ cm}^{-1}$ .

**Assay of GTs activity.** The *O*-GTs, *N*-GTs and total GTs activity was assayed based on methods of Lu et al., (2015) with slightly modifications.<sup>10</sup> The rate of decrease in the *p*-nitrophenol, 2, 4-dichloroaniline and isoproturon (IPU) concentration was assayed for the measurement of the *O*-GTs, *N*-GTs and total GTs activity with HPLC analysis in the reaction mixture, respectively. The assay mix (250  $\mu\text{L}$ ) contained 100  $\mu\text{L}$  of the enzymatic extraction, 2 mM UDP-glucose and 0.04 mM *p*-nitrophenol or 0.02 mM 2, 4-dichloroaniline or 0.02 mM IPU. The reaction was carried out at 30 °C for 2 h, and were terminated by addition of 250  $\mu\text{L}$  methanol and chilling to -20 °C for 0.5 h. The centrifuged supernatant was filtered through a 0.2 mm PTEF membrane (Iwaki Co. Ltd., Japan) prior to analysis using HPLC. One unit of the *O*-GTs, *N*-GTs and total GTs activity corresponded to the amount of enzyme activity that consumes 1  $\mu\text{mol}$  of *p*-nitrophenol, 2, 4-dichloroaniline and IPU per minute under standard assay conditions, respectively.

Analysis of *p*-nitrophenol, 2, 4-dichloroaniline and IPU were performed using a Waters HPLC system (HPLC, Waters 515; Waters Technologies Co. Ltd., USA, <http://www.waters.com>) with ultraviolet (UV) detection at a wavelength of 317 nm, 245 nm and 241 nm, respectively. The operating conditions were: Hypersil reversed phase  $\text{C}_8$  column

(Thermo, 250 mm×4.6 mm i.d.); mobile phase, methanol: water (3:2; v/v) for the analysis of *p*-nitrophenol and methanol: water (3:1, v/v) for the analysis of 2, 4-dichloroaniline and IPU; flow rate, 0.6 mL min<sup>-1</sup>; injection volume, 20 μL; temperature, 25 °C. Under the conditions, the retention time of *p*-nitrophenol, 2, 4-dichloroaniline and IPU were 6.32 min, 13.89 min and 16.77 min.

**Assay of *O*-MT activity.** The *O*-MT activity was assayed according to the methods of was assayed based on methods of Proestos et al., (2006) with some modifications.<sup>11</sup> The rate of increase the product concentration (4-hydroxy-3-methoxy benzoic) was assayed for the measurement of the *O*-MT activity with HPLC analysis in the reaction mixture (500 μL) that contained 200 μL of the enzymatic extraction, 1 mM MgCl<sub>2</sub>, 1 mM S-adenosyl-L-methionine (SAM) and 2 mM 3, 4-dihydroxybenzoic acid. The reaction was homogenized, incubated for 90 min at 37 °C and stopped by 500 μL methanol. The centrifuged supernatant was filtered through a 0.2 mm PTEF membrane (Iwaki Co. Ltd., Japan) prior to analysis using HPLC. Analysis of 4-hydroxy-3-methoxy benzoic was performed with ultraviolet (UV) detection at a wavelength of 256 nm. The analytical column was reversed-phase C<sub>18</sub> (Thermo, 250 mm × 4.6 mm). The mobile phase consisted of acetonitrile and water (20:80, v/v). The flow-rate was 0.6 mL min<sup>-1</sup>. The injection volume was 20 μL. Under the conditions, the retention time of 4-hydroxy-3-methoxy benzoic was 32.11 min. One unit of the *O*-MT activity corresponded to the amount of enzyme activity that consumes 1 μmol of 4-hydroxy-3-methoxy benzoic per minute under standard assay conditions



**Assay of glutathione *S*-transferase (GST) activity.** GST activity was followed by the method of Yin et al., (2008) with some modification.<sup>12</sup> The reaction mixture consisted of 3mL 100mM sodium phosphate buffer (pH 6.5) containing 1mM GSH, 75  $\mu$ L of 40mM 1-chloro-2,4-dinitro-benzene (CDNB), and 150  $\mu$ L enzyme extract. The change in absorbance was recorded at 340 nm.

## **EIC Data S2—Results and discussion**

### **Analysis of IPU residues and derivatives in rice tissues**

The extract MS<sup>2</sup> spectra of the molecular ion of  $m/z$  207.1479 occurred at the retention time of 20.22 min (ESI Fig. S5A). Fragmentation of IPU led to two product ions at  $m/z$  164.8821 and 134.0373. The most abundant product ion at  $m/z$  164.8821 was generated by the loss of isopropyl group (42 Da). The product ions at  $m/z$  134.0373 was 31 Da less than  $m/z$  164.8821, indicating the loss of  $-N(CH_3)_2$  group (ESI Fig. S6A). These characteristic product ions above were important for identification of IPU-metabolites.

The MS/MS spectra recorded from the  $m/z$  237.1575 precursor ions at 15.71 min produced ions at  $m/z$  219.1227,  $m/z$  205.0577, and  $m/z$  160, respectively (ESI Figs. S5B and S6B). The main fragment ion of  $m/z$  205.0577 was confirmed by loss of methoxy group, and subsequently it lost an isopropyl to form  $m/z$  164.9981. Thus, metabolite 2# was identified as 2-methoxyl-IPU in shoot alone (ESI Fig. S6B). A functional group isomer of metabolite 2# ( $m/z$  237.1212) was identified as 2-methylehanoic-IPU at 14.49 min in shoot and root of rice (ESI Fig. 5B),

according to the fragment ion of  $m/z$  219.0644 which was generated by a loss of  $-OH$  group (ESI Fig. 6C).

Hydroxylation of IPU was detected at  $m/z$  223.1423 including three isomers. The peak of first isomer (1-OH-isopropyl-IPU) and second isomers (2-OH-isopropyl-IPU) was at 10.66 min, because they are structural isomers which eliminate  $-OH$  and  $-N(CH_3)_2$  groups to yield the product ions of  $m/z$  205.0757 and  $m/z$  159.9032 (ESI Fig. S5C). The mass spectrum of third isomer (metabolite 4#) peaked at 10.66 min was produced by loss of 15 Da (methyl group) from metabolite 2# (ESI Fig. S6E). Its main product ion was  $m/z$  164.9033, which were produced by the cleavage of amido bond. Thus, metabolite 2# was identified as 2-methylehanoic-demethyl-IPU (ESI Fig. S6E).

Likewise, three isomers of  $m/z$  209.1276 were detected at 9.40, 9.65 and 10.18 min, respectively (ESI Fig. S5D). The first isomer (metabolite 6#) was confirmed by the  $N-OH$  substitution for the  $N-CH_3$  of IPU. Two main fragment ions at  $m/z$  191.0083 and  $m/z$  166.9824 were created after loss of hydroxyl and isopropyl groups (ESI Fig. S6F). With the structural mode, the IPU-derivative is  $N-OH$ -demethyl-IPU. Due to the absence of  $m/z$  166.9824 in the second isomer (metabolite 7#), we deduced that the  $-OH$  group was linked to isopropyl group, and identified metabolite 7# as 1-OH-didemthyl-IPU or 2-OH-didemthyl-IPU. The third isomer which had a solemn fragment ion of  $m/z$  135.9044, was defined as 2-methoxyl-didemthyl-IPU (ESI Fig. S6H).

Isopropenyl-IPU (metabolite 9#) was eluted at 17.35 min with protonated molecular ion  $[M+H]^+$  of  $m/z$  205.1323 in the full-scan MS (ESI Fig. S5E). In the  $MS^2$  spectrum, it had the typical and most abundant fragment ion at  $m/z$  159.9131 (loss of  $-N(CH_3)_2$  group) (ESI Fig.

S6I).

Metabolite 10# peaked at 7.94 min had a protonated molecular ion  $[M+H]^+$  at  $m/z$  195.1128 (ESI Fig. S5F). The MS/MS spectra gave prominent ions at  $m/z$  176.9940 and 151.0396, which were produced by the loss of  $-OH$  and the cleavage of amido linkage, respectively (ESI Fig. S6E). Thus, we tentatively elucidated metabolite 10# (1-OH-didemethyl-IPU or 2-OH-didemethyl-IPU) to be formed by *N*-dealkylation of metabolite 7#.

Metabolite 11# eluted at 18.96 min with a protonated molecular ion  $[M+H]^+$  at  $m/z$  193.1335 was 14 Da less than its parent IPU and formed by a loss of methyl group (ESI Fig. S5G). The corresponding fragment ions at  $m/z$  150.9291 were generated by loss of the isopropyl group and  $m/z$  135.9277 through cleaving of amino C–N bond (ESI Fig. S6K). Thus, metabolite 11# could be characterized as *N*-dealkylation products of parent IPU.

From the accurate mass value of  $[M+H]^+$  ion ( $m/z$  191.1179), we found two isomers at 8.63 and 17.88 min (ESI Fig. S5H). The MS<sup>2</sup> spectra of one isomer (metabolite 12#) gave prominent ions at  $m/z$  160.0135 and  $m/z$  145.9161, which were produced by the loss of  $-N=CH_2$  and further loss of  $-CH_3$ , respectively (ESI Fig. S6L). Hence, metabolite 12# was identified as methyleneimido-IPU. The other isomer can be determined that the new compound metabolite 13# was the *N*-demethylated metabolite 13# (ESI Fig. S6M), according to its fragments at  $m/z$  134 which was yielded by loss of  $-N(CH_3)_2$  and  $=CH_2$  groups.

For  $m/z$  180.1383, which peaked at 17.59 min, the fragment ion of  $m/z$  149.0315 and  $m/z$  106.8587 from loss of  $-NH-CH_3$  and 2-methoxy-isopropyl groups, respectively, indicated that metabolite 14# was likely identified as 4-(1-methoxy-2-methyl-2-propanyl)-*N*-methylaniline (ESI Figs. S5I and S6N).

The molecular ion at  $m/z$  179.1167 (metabolite 15#) was eluted at 17.78 min (ESI Fig. S5J). The MS<sup>2</sup> spectra showed that elimination of C<sub>3</sub>H<sub>7</sub> group led to occurrence of fragment ions at  $m/z$  136.9184, from which metabolite 11# was defined as didesmethyl-IPU (ESI Fig. S6O). Subsequently, metabolite 11# loss –CONH<sub>2</sub> group to form 4-isopropylphenol (metabolite 18#) at 18.84 min whose fragment ions was  $m/z$  93.7707 (ESI Figs. S5M and S6R). Moreover, the amino group of metabolite 18# was substituted by hydroxyl group, which generated 4-isopropylaniline (metabolite 19#) at 16.66 min (ESI Figs. S5N and S6S).

For  $m/z$  175.0856, which peaked at 3.15 min, the fragment ion of  $m/z$  145.1216 from the loss of –N=CH<sub>2</sub> group indicated that the double bond occurred on the –N(CH)<sub>3</sub>. So the metabolite 16# was defined as isopropenyl-demethyl-methyleneimido-IPU (ESI Figs. S5K and S6P). After the cleavage of amido linkage, 4-vinylaniline (metabolite 20#) was formed with the fragment ions of  $m/z$  103.0033 and 93.0137 (ESI Figs. S5O and S6T).

Based on the fragment ions of  $m/z$  121.0020 and  $m/z$  105.8634 which was generated by loss of –CH<sub>3</sub>OH and further loss of –NH<sub>2</sub>, the metabolite 17# was identified as 1-(4-aminophenyl)-2-propanol or 2-(4-aminophenyl)-2-propanol from metabolite 10# via the cleavage of amido linkage (ESI Figs. S5L and S6Q).

Compared to the controls and IPU treatment, five new peaks linked to one IPU-conjugate and four glucosylated IPU derivatives were identified. The peak at 15.97min was detected by MS and revealed a glucosylated IPU-derivative (conjuagte1#,  $m/z$  251.1390) with [M+H]<sup>+</sup> ions at  $m/z$  233.1279 and  $m/z$  205.1077(ESI Figs. S5P and S7A), which could be attributed to the loss of a hydroxyl group and carboxyl group. With the mass spectrum, a structure like *N*-acetyloxy-monodemethyl-IPU.

According to the fragment ions of  $m/z$  179.1167 and  $m/z$  137.0702, the parent ion of  $m/z$  357.1643 at 17.67 min was assigned to 2-OH-didemethyl-IPU-*O*-glucoside (conjugate 2#), a sugar ring linked to metabolite 10# by the *O*-glycosidic bond (ESI Figs. S5Q and S7B). The other conjugates were formed by glycosylation and yielded a similar fragment ion. Two major IPU-derived conjugates ( $m/z$  371.1792 and  $m/z$  385.1943) eluted at 9.35 and 10.69 min were detected by MS/MS analysis (ESI Figs. S5R and S7C). There were fragment ions at  $m/z$  223.0465 and  $m/z$  209.0831, indicating that metabolites 4# ( $m/z$  223.1423) and 7# ( $m/z$  209.1276) were the reasonable sugar (162 Da) receptors (ESI Figs. S6W and S7D). Thus, the two compounds with 2-OH-monodemethyl-IPU-*O*-glucoside and 2-OH-IPU-*O*-glucoside were assigned conjugates 3# and 4#, respectively.

A small peak ( $t_R$  = 10.46 min) at  $m/z$  399.1730 was detected (ESI Fig. S5T) with fragment ions at  $m/z$  381.1250,  $m/z$  340.2589 and  $m/z$  179.1173. Ion of  $m/z$  381.1250 was attributed to the dehydroxylated form of its precursor. Elimination of  $-\text{CH}_3\text{COO}$  from  $m/z$  399.1730 resulted in the formation of  $m/z$  340.2589 ion. Further loss of sugar ring led to the formation of  $m/z$  179.1173 fragment ion, suggesting that the IPU-derived degradation product was conjugated to metabolite 10# (ESI Fig. S7E). Thus, the metabolite was identified as 2-OH-didemethyl-IPU-*O*-acetylglucoside. Overall, all the IPU-derivatives were summarized in Table 1.

## REFERENCES

- 1 F. Carine, A. G. Enrique and C. Steven, *Ecotox. Environ. Safe.*, 2009, **72**, 108–114.
- 2 Y. S. Wang and Z. M. Yang, *Plant Cell Physiol.*, 2005, **46**, 1915–1923.
- 3 C. Beauchamp and I. Fridovich, *Anal. Biochem.*, 1971, **44**, 276–287.
- 4 M. A. Hossain and K. Asada, *Plant Cell Physiol.*, 1984, **25**, 1285–1295.
- 5 A. Ranieri, G. D'Urso, C. Nali, N. G. Lorenzini and G. F. Soldatini, *Physiol. Plant*, 1996, **97**, 381–387.
- 6 M. C. De Tullio, C. Paciolla, F. D. Vecchia, N. Rascio, S. D'Emerico, L. De Gara, R. Liso and O. Arrigoni, 1999. *Planta*, 1999, **209**, 424–434.
- 7 K. Amako, G. X. Chen and K. Asada, *Plant Cell Physiol.*, 1994, **35**, 497–504.
- 8 M. M. Bradford, *Anal. Biochem.*, 1976, **72**, 248–254.
- 9 L. R. Tan, Y. C. Lu, J. J. Zhang, F. Luo and H. Yang, *Ecotox. Environ. Safe.*, 2015, **119**, 25–34.
- 10 Y. C. Lu, S. Zhang and H. Yang, *J. Hazard. Mater.*, 2015, **283**, 806–814.
- 11 C. Proestos, I. S. Boziaris, G. J. Nychas and M. Komaitis, *Food Chem.*, 2006, **95**, 664–671.
- 12 X. L. Yin, L. Jiang, N. H. Song and H. Yang, *J. Agr. Food Chem.*, 2008, **56**, 4825–4831.
